# Supplementary material for: Visible-light-induced synthesis of bibenzofuranones via a cerium-mediated energy transfer process
Source: Royal Society of Chemistry journal article supplement (doi:10.1039/d4cc06761d), 2025-01-01

## Visible-light-induced synthesis of bibenzofuranones *via* a cerium-mediated energy transfer process

Jiaoyue Lv,<sup>1</sup> Yatao Lang,<sup>1</sup> Chao-Jun Li<sup>2</sup> and Huiying Zeng\*<sup>1</sup>

<sup>1</sup>The State Key Laboratory of Applied Organic Chemistry, and College of Chemistry and Chemical Engineering, Lanzhou University, Lanzhou 730000, P. R. China

<sup>2</sup>Department of Chemistry, and FQRNT Centre for Green Chemistry and Catalysis, McGill University, 801 Sherbrooke West, Montreal, QC H3A 0B8, Canada

### Supporting Information

|                                                                        |    |
|------------------------------------------------------------------------|----|
| I. General Method .....                                                | 1  |
| II. Optimization of the Reaction Conditions .....                      | 1  |
| III. General Experimental Procedure .....                              | 3  |
| IV. Investigating the Role of DMSO under Oxidant-Free Conditions ..... | 3  |
| V. X-Ray Crystallographic Data for <b>2p-1</b> .....                   | 4  |
| VI. Preparation and Characterization of Starting Materials .....       | 9  |
| VII. Cross-coupling reaction of two different benzil derivatives ..... | 12 |
| VIII. Investigation of the Mechanism .....                             | 13 |
| IX. Characterization Data for Products .....                           | 19 |
| X. References .....                                                    | 32 |
| XI. NMR Spectra .....                                                  | 34 |

## I. General Method

All reagents and solvents were purchased from commercial sources and used without further purification unless otherwise stated. All reactions were monitored by thin-layer chromatography (TLC). All reactions were carried out under argon atmosphere unless otherwise stated. Column chromatography was performed on silica gel (200-300 mesh) and visualized with ultraviolet light. Ethyl acetate and petroleum ether were used as eluents.  $^1\text{H}$  and  $^{13}\text{C}$  NMR spectra were taken on Bruker AV400 and Agilent INOVA 600 with TMS as an internal standard and  $\text{CDCl}_3$  as solvent.  $^{19}\text{F}$  NMR was recorded on Bruker Avance Neo 600 and Jeol Jnm-Ecs 400M. HRMS analyses were made by Lanzhou University by means of ESI. Melting points were measured using a micro melting point apparatus and are uncorrected. FT-IR spectra were recorded on an IR Tracer-100 spectrometer. The UV-Vis absorption experiments were conducted using SHIMADZU UV-2600.

## II. Optimization of the Reaction Conditions

**Table S1.** Screening of oxidants<sup>a,b</sup>

| Entry           | Oxidant                                | Yield (%) <sup>b</sup> |
|-----------------|----------------------------------------|------------------------|
| 1               | —                                      | 14                     |
| 2 <sup>c</sup>  | —                                      | n.p.                   |
| 3 <sup>cd</sup> | DMSO                                   | 15                     |
| 4 <sup>e</sup>  | $\text{O}_2$                           | 14                     |
| 5               | TBHP                                   | 12                     |
| 6               | PIDA                                   | 28                     |
| 7               | m-CPBA                                 | 24                     |
| 8               | 4-picoline-N-oxide                     | 20                     |
| 9               | 4-cyanopyridine-N-oxide                | n.p.                   |
| 10              | $\text{NaIO}_4$                        | 34                     |
| 11              | $\text{K}_2\text{S}_2\text{O}_8$       | 26                     |
| 12              | $\text{Ce}(\text{SO}_4)_2$             | 76                     |
| 13              | CAN                                    | 42                     |
| 14              | $\text{CeO}_2$                         | 34                     |
| 15              | $\text{CeCl}_3$                        | 40                     |
| 16              | $\text{Ce}(\text{SO}_4)_2$ (0.05 mmol) | 64                     |
| 17              | $\text{Ce}(\text{SO}_4)_2$ (0.15 mmol) | 74                     |

<sup>a</sup> Reaction conditions: benzil (0.1 mmol), DMSO (1.0 mL), oxidant (0.1 mmol), and  $\text{H}_2\text{O}$  (60  $\mu\text{L}$ ) were irradiated with 380 nm light for 24 h under argon atmosphere at room temperature. <sup>b</sup> Yields were determined by  $^1\text{H}$  NMR with nitromethane as internal standard. <sup>c</sup>  $\text{CH}_3\text{CN}$  (1 mL), Ar. <sup>d</sup>

DMSO (0.5 mmol, 5.0 equiv.). <sup>e</sup> O<sub>2</sub> atmosphere. TBHP, *tert*-butyl hydroperoxide; PIDA, phenyliodine diacetate; *m*-CPBA, 3-chloroperoxybenzoic acid; CAN, ammonium ceric sulfate.

**Table S2.** Screening of the light sources<sup>a,b</sup>

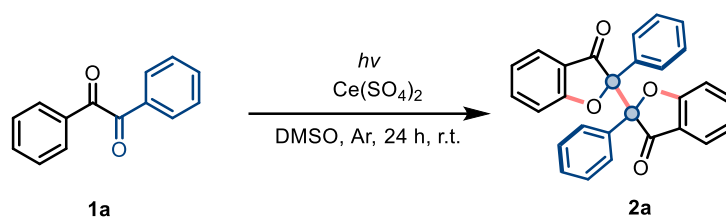

| Entry | Light source | Yield (%) <sup>b</sup> |
|-------|--------------|------------------------|
| 1     | 380 nm       | 76                     |
| 2     | 405 nm       | 90 (82)                |
| 3     | 425 nm       | 62                     |
| 4     | 465 nm       | 50                     |

<sup>a</sup> Reaction conditions: benzil (0.1 mmol), DMSO (1.0 mL), Ce(SO<sub>4</sub>)<sub>2</sub> (0.1 mmol), and H<sub>2</sub>O (60 μL) were irradiated with light for 24 h under argon atmosphere at room temperature. <sup>b</sup> Yields were determined by <sup>1</sup>H NMR with nitromethane as internal standard. Isolated yield in brackets.

**Table S3.** Screening of the solvents<sup>a,b</sup>

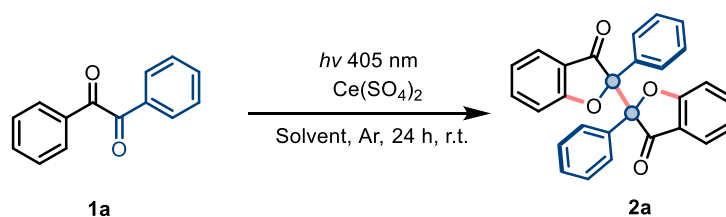

| Entry          | Solvent            | Yield (%) <sup>b</sup> |
|----------------|--------------------|------------------------|
| 1              | DMSO               | 90 (82)                |
| 2              | acetone            | 74                     |
| 3              | methanol           | 48                     |
| 4              | isopropyl alcohol  | 80                     |
| 5              | CH <sub>3</sub> CN | 70                     |
| 6              | EtOAc              | 48                     |
| 7 <sup>c</sup> | DMSO               | 80                     |

<sup>a</sup> Reaction conditions: benzil (0.1 mmol), solvent (1.0 mL), Ce(SO<sub>4</sub>)<sub>2</sub> (0.1 mmol), and H<sub>2</sub>O (60 μL) were irradiated with 405 nm light for 24 h under argon atmosphere at room temperature. <sup>b</sup> Yields were determined by <sup>1</sup>H NMR with nitromethane as internal standard. <sup>c</sup> Without H<sub>2</sub>O.

### III. General Experimental Procedure

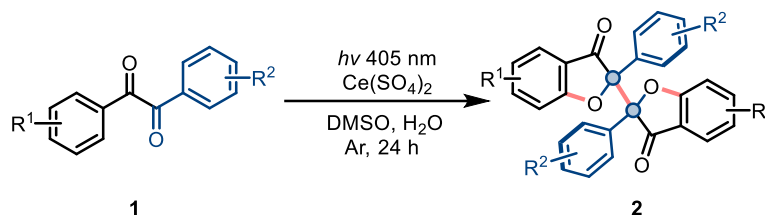

To a 20 mL dry glass tube with stirring bar were added **1** (0.1 mmol, 1.0 equiv.),  $\text{Ce}(\text{SO}_4)_2$  (33.2 mg, 0.1 mmol, 1.0 equiv.),  $\text{H}_2\text{O}$  (60  $\mu\text{L}$ ), and DMSO (1 mL). The resulting mixture was evacuated by three freeze-pump-thaw cycles and back-filled with ultra-purified argon. The mixture was then stirred at room temperature and irradiated with 405 nm light for 24 h. After reaction, it was filtered with celite, and extracted with ethyl acetate (3 $\times$ 5 mL). The combined organic phases were washed with brine (10 mL), and then dried over anhydrous  $\text{Na}_2\text{SO}_4$ . The organic layers were concentrated in vacuo, and the crude product was purified by preparative TLC on silica gel to afford the product. SemiLEDs blue LEDs (405 nm, 3W $\times$ 2).

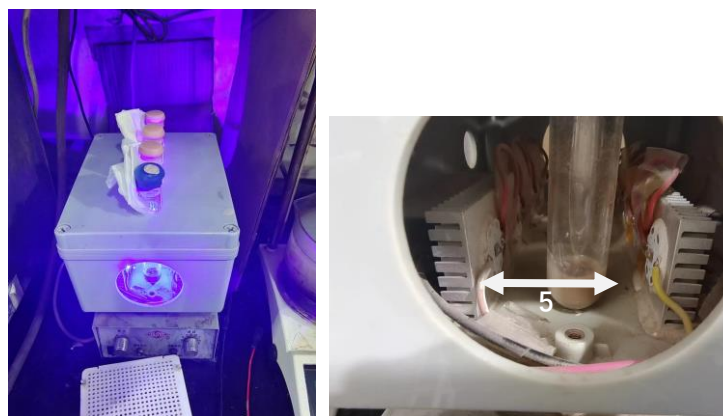

**Figure S1.** Photochemical reaction setup

### IV. Investigating the Role of DMSO under Oxidant-Free Conditions.

Under oxidant-free conditions, we attempted to use  $\text{CH}_3\text{CN}$  as the reaction solvent, and no product **2a** was found. However, when 5 equivalents of DMSO were added to the reaction system with  $\text{CH}_3\text{CN}$  as the solvent, product **2a** was obtained with 15% yield. Please see Supporting Information Table S1.

In addition, gas chromatography-mass spectrometry (GC-MS) analysis confirmed the formation of dimethyl sulfide in the reaction described in entry 1 of Table 1 (Equation 1). To further quantify the amount of dimethyl sulfide produced, gas chromatography (GC) was conducted. Furthermore, to exclude the possibility of DMSO undergoing self-reduction under light exposure, a blank control experiment (reaction 2) was designed and performed.

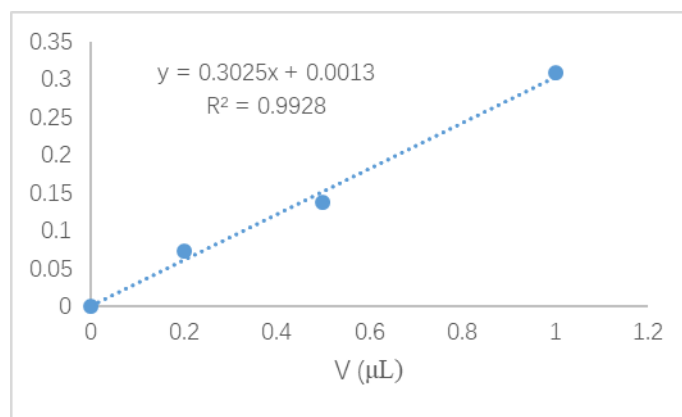

The standard curve is represented by the equation  $y = 0.3025x + 0.0013$ , with  $R^2 = 0.9928$ . The variable  $x$  denotes the volume of dimethyl sulfide ( $\mu\text{L}$ ), whereas  $y$  represents the ratio of the peak area of dimethyl sulfide to that of diphenylmethane, which is used as the internal standard.

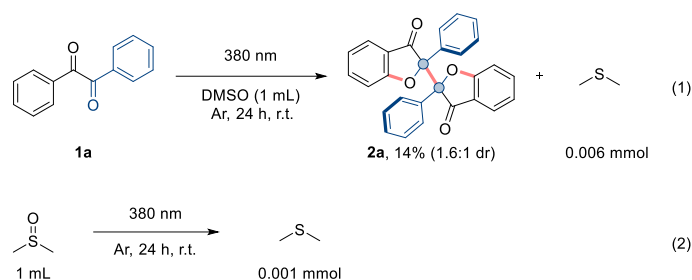

GC analysis confirmed the formation of 0.46  $\mu\text{L}$  (0.006 mmol) of dimethyl sulfide under the conditions specified in entry 1 of Table 1 (reaction 1), whereas only 0.07  $\mu\text{L}$  (0.001 mmol) was detected in the corresponding blank control experiment (reaction 2). These experimental results demonstrated that DMSO acts as an oxidant under the specified reaction conditions in entry 1 of Table 1.

## V. X-Ray Crystallographic Data for 2p-1

The chloroform solution of **2p-1** was slowly evaporated at room temperature to give crystals. X-ray crystal structures of **2p-1** were determined at 293 K. Crystal structure information has been deposited at the Cambridge Crystallographic Data Centre, CCDC: 2068626.

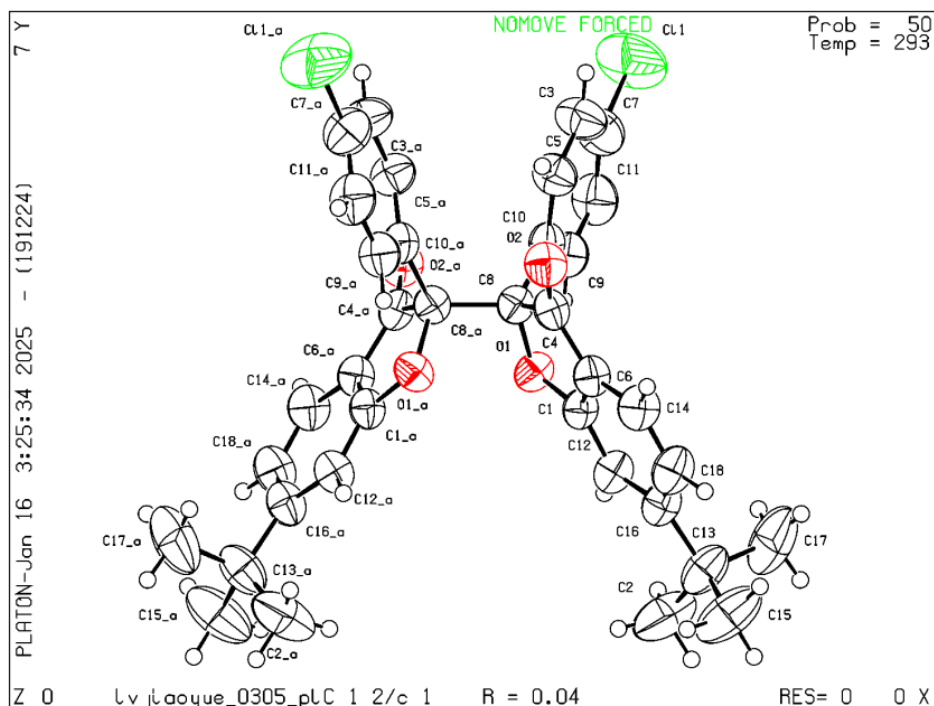

**Figure S2.** Crystal structure of compound **2p-1**

**Table S4.** X-ray crystallographic data of **2p-1**

|                                          |                                                                |                                                                |
|------------------------------------------|----------------------------------------------------------------|----------------------------------------------------------------|
| Bond precision:                          | C-C = 0.0025 Å                                                 | Wavelength=1.54184                                             |
| Cell:                                    | a = 20.4876(3)    b = 12.8985(4)    c = 12.1074(2)             |                                                                |
|                                          | alpha = 90    beta = 102.608(1)    gamma = 90                  |                                                                |
| Temperature:                             | 293 K                                                          |                                                                |
|                                          | Calculated                                                     | Reported                                                       |
| Volume                                   | 3122.34 (12)                                                   | 3122.34 (12)                                                   |
| Space group                              | C 2/c                                                          | C 1 2/c 1                                                      |
| Hall group                               | -C 2yc                                                         | -C 2yc                                                         |
| Moiety formula                           | C <sub>36</sub> H <sub>32</sub> Cl <sub>2</sub> O <sub>4</sub> | C <sub>36</sub> H <sub>32</sub> Cl <sub>2</sub> O <sub>4</sub> |
| Sum formula                              | C <sub>36</sub> H <sub>32</sub> Cl <sub>2</sub> O <sub>4</sub> | C <sub>36</sub> H <sub>32</sub> Cl <sub>2</sub> O <sub>4</sub> |
| Mr                                       | 599.52                                                         | 599.51                                                         |
| Dx, g cm <sup>-3</sup>                   | 1.275                                                          | 1.275                                                          |
| Z                                        | 4                                                              | 4                                                              |
| Mu (mm <sup>-1</sup> )                   | 2.172                                                          | 2.172                                                          |
| F000                                     | 1256.0                                                         | 1256.0                                                         |
| F000'                                    | 1262.20                                                        |                                                                |
| h, k, lmax                               | 25,16,15                                                       | 25,16,14                                                       |
| Nref                                     | 3253                                                           | 3093                                                           |
| Tmin, Tmax                               | 0.925,0.957                                                    | 0.588,1.000                                                    |
| Tmin'                                    | 0.897                                                          |                                                                |
| Correction method = # Reported T Limits: | Tmin = 0.588                                                   |                                                                |
| Tmax = 1.000 AbsCorr = MULTI-SCAN        |                                                                |                                                                |
| Data completeness = 0.951                | Theta(max) = 75.615                                            |                                                                |
| R(reflections) = 0.0421 (2597)           | wR2(reflections) = 0.1250 (3093)                               |                                                                |

Thermal ellipsoids are shown at 50% probability.

**Table S5.** Fractional Atomic Coordinates ( $\times 10^4$ ) and Equivalent Isotropic Displacement Parameters ( $\text{\AA}^2 \times 10^3$ ) for **2p-1**.  $U_{\text{eq}}$  is defined as 1/3 of the trace of the orthogonalised  $U_{\text{IJ}}$  tensor.

| Atom | x          | y          | z          | $U(\text{eq})$ |
|------|------------|------------|------------|----------------|
| C11  | 794.2(5)   | 9514.4(6)  | -681.9(7)  | 137.8(4)       |
| O1   | 402.0(5)   | 5039.8(8)  | 1775.0(8)  | 51.1(3)        |
| O2   | 1005.2(5)  | 6582.0(9)  | 4209.7(9)  | 61.1(3)        |
| C1   | 946.6(7)   | 4506.5(11) | 2363.5(11) | 48.3(3)        |
| C2   | 1533.2(15) | 1523.6(19) | 1471(2)    | 114.5(10)      |
| C3   | 744.4(12)  | 8681.9(16) | 1339.6(19) | 82.5(6)        |
| C4   | 905.6(7)   | 5934.7(12) | 3467.9(11) | 49.0(3)        |
| C5   | 647.4(9)   | 7877.4(13) | 2043.9(15) | 65.3(4)        |
| C6   | 1254.7(7)  | 4978.7(12) | 3367.1(11) | 50.2(3)        |
| C7   | 689.5(11)  | 8494.8(17) | 205.7(18)  | 82.2(6)        |
| C8   | 353.8(7)   | 6006.1(11) | 2362.1(11) | 47.4(3)        |
| C9   | 446.9(8)   | 6725.3(14) | 463.9(13)  | 61.9(4)        |
| C10  | 487.4(7)   | 6892.1(12) | 1612.7(12) | 51.7(3)        |
| C11  | 550.4(10)  | 7522.0(17) | -235.4(16) | 77.2(5)        |
| C12  | 1173.5(7)  | 3598.2(12) | 1988.8(12) | 54.4(4)        |
| C13  | 2054.6(10) | 2192.7(16) | 2211.3(15) | 74.4(5)        |
| C14  | 1821.9(8)  | 4523.8(14) | 4039.0(13) | 60.9(4)        |
| C15  | 2466.3(16) | 1546(2)    | 3171(2)    | 114.7(10)      |
| C16  | 1745.7(8)  | 3144.2(14) | 2646.4(13) | 58.6(4)        |
| C17  | 2524.3(14) | 2615(3)    | 1486(2)    | 122.2(10)      |
| C18  | 2058.6(8)  | 3625.0(15) | 3671.0(14) | 66.1(4)        |

**Table S6.** Anisotropic Displacement Parameters ( $\text{\AA}^2 \times 10^3$ ) for **2p-1**. The Anisotropic displacement factor exponent takes the form:  $-2\pi^2[h^2a^*U_{11}+2hka^*b^*U_{12}+\dots]$ .

| Atom | U11       | U22      | U33      | U23       | U13      | U12       |
|------|-----------|----------|----------|-----------|----------|-----------|
| C11  | 206.9(9)  | 110.9(5) | 109.0(5) | 40.6(4)   | 63.5(5)  | -19.6(5)  |
| O1   | 48.1(5)   | 56.6(6)  | 43.1(5)  | -5.4(4)   | -2.3(4)  | 7.2(4)    |
| O2   | 59.8(6)   | 71.4(7)  | 48.2(6)  | -11.4(5)  | 3.5(5)   | -6.8(5)   |
| C1   | 42.3(7)   | 59.4(8)  | 41.0(7)  | 4.8(6)    | 4.3(5)   | 3.7(6)    |
| C2   | 125(2)    | 87.9(16) | 116(2)   | -27.6(14) | -4.4(16) | 41.4(14)  |
| C3   | 104.4(15) | 64.6(11) | 81.9(13) | 5.2(9)    | 27.9(11) | -12.4(10) |
| C4   | 43.8(7)   | 61.2(8)  | 40.3(7)  | -0.5(6)   | 5.2(5)   | -7.0(6)   |
| C5   | 75.7(11)  | 65.0(10) | 56.5(9)  | 0.0(7)    | 17.5(8)  | -7.2(8)   |
| C6   | 45.2(7)   | 61.3(8)  | 41.4(7)  | 2.2(6)    | 3.6(6)   | -0.8(6)   |
| C7   | 95.2(14)  | 83.5(13) | 74.2(12) | 18.8(10)  | 32.1(11) | -3.6(11)  |
| C8   | 45.1(7)   | 52.8(8)  | 41.6(7)  | -3.5(6)   | 3.5(5)   | 0.5(6)    |
| C9   | 64.1(9)   | 73.5(10) | 49.8(8)  | 0.1(7)    | 15.9(7)  | 1.4(8)    |

|     |           |          |          |          |          |          |
|-----|-----------|----------|----------|----------|----------|----------|
| C10 | 46.5(7)   | 61.8(8)  | 46.5(7)  | 1.8(6)   | 9.6(6)   | 1.4(6)   |
| C11 | 85.1(12)  | 97.5(14) | 53.6(9)  | 10.0(9)  | 25.2(9)  | 0.5(11)  |
| C12 | 54.3(8)   | 65.9(9)  | 41.0(7)  | 0.9(6)   | 5.9(6)   | 8.7(7)   |
| C13 | 78.8(11)  | 88.6(12) | 53.7(9)  | 5.2(9)   | 9.6(8)   | 35.7(10) |
| C14 | 54.8(8)   | 75.6(10) | 45.5(7)  | 2.7(7)   | -4.1(6)  | 2.6(7)   |
| C15 | 150(2)    | 118(2)   | 68.8(13) | 12.0(12) | 9.8(14)  | 76.8(18) |
| C16 | 56.3(8)   | 72.3(10) | 46.7(8)  | 8.7(7)   | 10.5(6)  | 14.1(7)  |
| C17 | 113.7(19) | 169(3)   | 98.6(17) | 17.4(18) | 54.4(16) | 59.9(19) |
| C18 | 55.9(9)   | 85.1(11) | 51.6(8)  | 7.3(8)   | -1.1(7)  | 15.8(8)  |

**Table S7.** Bond Lengths for **2p-1**

| Atom | Atom | Length/Å   | Atom | Atom | Length/Å |
|------|------|------------|------|------|----------|
| C11  | C7   | 1.741(2)   | C6   | C14  | 1.394(2) |
| O1   | C1   | 1.3707(16) | C7   | C11  | 1.369(3) |
| O1   | C8   | 1.4489(16) | C8   | C81  | 1.557(3) |
| O2   | C4   | 1.2106(17) | C8   | C10  | 1.521(2) |
| C1   | C6   | 1.382(2)   | C9   | C10  | 1.392(2) |
| C1   | C12  | 1.374(2)   | C9   | C11  | 1.377(3) |
| C2   | C13  | 1.507(3)   | C12  | C16  | 1.394(2) |
| C3   | C5   | 1.385(2)   | C13  | C15  | 1.526(3) |
| C3   | C7   | 1.374(3)   | C13  | C16  | 1.526(2) |
| C4   | C6   | 1.444(2)   | C13  | C17  | 1.537(3) |
| C4   | C8   | 1.5550(19) | C14  | C18  | 1.368(2) |
| C5   | C10  | 1.386(2)   | C16  | C18  | 1.410(2) |

**Table S8.** Bond Angles for **2p-1**

| Atom | Atom | Atom | Angle/°    | Atom | Atom | Atom | Angle/°    |
|------|------|------|------------|------|------|------|------------|
| C1   | O1   | C8   | 108.16(10) | C10  | C8   | C4   | 111.50(11) |
| O1   | C1   | C6   | 113.54(13) | C10  | C8   | C81  | 115.16(10) |
| O1   | C1   | C12  | 123.52(12) | C11  | C9   | C10  | 121.03(17) |
| C12  | C1   | C6   | 122.93(13) | C5   | C10  | C8   | 121.53(13) |
| C7   | C3   | C5   | 119.49(19) | C5   | C10  | C9   | 118.40(15) |
| O2   | C4   | C6   | 130.20(13) | C9   | C10  | C8   | 120.06(14) |
| O2   | C4   | C8   | 124.81(13) | C7   | C11  | C9   | 119.41(17) |
| C6   | C4   | C8   | 104.97(11) | C1   | C12  | C16  | 118.21(14) |
| C3   | C5   | C10  | 120.61(17) | C2   | C13  | C15  | 110.0(2)   |
| C1   | C6   | C4   | 108.12(12) | C2   | C13  | C16  | 111.86(16) |
| C1   | C6   | C14  | 119.34(14) | C2   | C13  | C17  | 108.3(2)   |
| C14  | C6   | C4   | 132.47(14) | C15  | C13  | C16  | 112.27(15) |
| C3   | C7   | C11  | 119.33(17) | C15  | C13  | C17  | 108.5(2)   |
| C11  | C7   | C11  | 119.65(16) | C16  | C13  | C17  | 105.70(18) |
| C11  | C7   | C3   | 121.02(18) | C18  | C14  | C6   | 118.43(14) |



|    |    |     |            |     |     |     |            |
|----|----|-----|------------|-----|-----|-----|------------|
| O1 | C8 | C4  | 104.88(11) | C12 | C16 | C13 | 120.06(14) |
| O1 | C8 | C81 | 105.75(8)  | C12 | C16 | C18 | 118.81(15) |
| O1 | C8 | C10 | 108.26(11) | C18 | C16 | C13 | 120.95(14) |
| C4 | C8 | C81 | 110.57(14) | C14 | C18 | C16 | 122.27(14) |

**Table S9.** Torsion Angles for **2p-1**

| A   | B   | C   | D               | Angle/°     | A               | B   | C   | D               | Angle/°     |
|-----|-----|-----|-----------------|-------------|-----------------|-----|-----|-----------------|-------------|
| C11 | C7  | C11 | C9              | -177.94(15) | C5              | C3  | C7  | C11             | 178.63(17)  |
| O1  | C1  | C6  | C4              | -1.71(17)   | C5              | C3  | C7  | C11             | -1.0(3)     |
| O1  | C1  | C6  | C14             | -179.00(13) | C6              | C1  | C12 | C16             | -0.9(2)     |
| O1  | C1  | C12 | C16             | 178.03(14)  | C6              | C4  | C8  | O1              | 4.74(14)    |
| O1  | C8  | C10 | C5              | -163.00(13) | C6              | C4  | C8  | C8 <sup>1</sup> | 118.31(9)   |
| O1  | C8  | C10 | C9              | 17.34(17)   | C6              | C4  | C8  | C10             | -112.20(13) |
| O2  | C4  | C6  | C1              | 179.69(15)  | C6              | C14 | C18 | C16             | -0.5(3)     |
| O2  | C4  | C6  | C14             | -3.5(3)     | C7              | C3  | C5  | C10             | -0.9(3)     |
| O2  | C4  | C8  | O1              | -176.84(13) | C8              | O1  | C1  | C6              | 4.97(16)    |
| O2  | C4  | C8  | C8 <sup>1</sup> | -63.28(15)  | C8              | O1  | C1  | C12             | -174.07(13) |
| O2  | C4  | C8  | C10             | 66.21(18)   | C8              | C4  | C6  | C1              | -2.01(15)   |
| C1  | O1  | C8  | C4              | -5.80(14)   | C8              | C4  | C6  | C14             | 174.77(16)  |
| C1  | O1  | C8  | C8 <sup>1</sup> | -122.72(13) | C8 <sup>1</sup> | C8  | C10 | C5              | 78.92(19)   |
| C1  | O1  | C8  | C10             | 113.35(12)  | C8 <sup>1</sup> | C8  | C10 | C9              | -100.75(16) |
| C1  | C6  | C14 | C18             | 0.7(2)      | C10             | C9  | C11 | C7              | -0.6(3)     |
| C1  | C12 | C16 | C13             | -174.19(15) | C11             | C9  | C10 | C5              | -1.2(2)     |
| C1  | C12 | C16 | C18             | 1.0(2)      | C11             | C9  | C10 | C8              | 178.45(15)  |
| C2  | C13 | C16 | C12             | -31.6(3)    | C12             | C1  | C6  | C4              | 177.33(13)  |
| C2  | C13 | C16 | C18             | 153.3(2)    | C12             | C1  | C6  | C14             | 0.0(2)      |
| C3  | C5  | C10 | C8              | -177.74(16) | C12             | C16 | C18 | C14             | -0.3(3)     |
| C3  | C5  | C10 | C9              | 1.9(3)      | C13             | C16 | C18 | C14             | 174.86(17)  |
| C3  | C7  | C11 | C9              | 1.7(3)      | C15             | C13 | C16 | C12             | -155.8(2)   |
| C4  | C6  | C14 | C18             | -175.81(16) | C15             | C13 | C16 | C18             | 29.1(3)     |
| C4  | C8  | C10 | C5              | -48.12(19)  | C17             | C13 | C16 | C12             | 86.1(2)     |
| C4  | C8  | C10 | C9              | 132.21(14)  | C17             | C13 | C16 | C18             | -89.1(2)    |

**Table S10.** Hydrogen Atom Coordinates ( $\text{\AA} \times 10^4$ ) and Isotropic Displacement Parameters ( $\text{\AA}^2 \times 10^3$ ) for **2p-1**

| Atom | x       | y       | z        | U(eq) |
|------|---------|---------|----------|-------|
| H2A  | 1334.14 | 1897.35 | 795.4    | 172   |
| H2B  | 1194.11 | 1344.23 | 1873.21  | 172   |
| H2C  | 1739.37 | 903.02  | 1271.58  | 172   |
| H3   | 845.79  | 9343.7  | 1631.68  | 99    |
| H5   | 690.06  | 7999.45 | 2813.37  | 78    |
| H9   | 348.56  | 6065.47 | 163.91   | 74    |
| H11  | 525.86  | 7400.43 | -1000.48 | 93    |

| Atom | x       | y       | z       | U(eq) |
|------|---------|---------|---------|-------|
| H12  | 951.46  | 3294.24 | 1314.55 | 65    |
| H14  | 2034.3  | 4824.15 | 4721.29 | 73    |
| H15A | 2189.25 | 1337.06 | 3676.54 | 172   |
| H15B | 2834.1  | 1951.3  | 3576.59 | 172   |
| H15C | 2634.47 | 941.59  | 2861.97 | 172   |
| H17A | 2881.65 | 2996.6  | 1957.72 | 183   |
| H17B | 2278.38 | 3064.21 | 910.93  | 183   |
| H17C | 2706.42 | 2047.9  | 1137.15 | 183   |
| H18  | 2438.98 | 3320.73 | 4112.02 | 79    |

## VI. Preparation and Characterization of Starting Materials

### i. The preparation of the starting materials

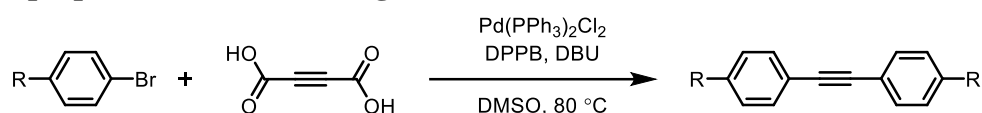

Symmetric substrate synthesis:<sup>1</sup> bromocumene (20.0 mmol, 2.0 equiv.), acetylenedicarboxylic acid (1.14 g, 10.0 mmol, 1.0 equiv.), Pd(PPh<sub>3</sub>)<sub>2</sub>Cl<sub>2</sub> (426.8 mg, 1 mmol, 0.1 equiv.), 1,4-bis(diphenylphosphanyl)butane (350.9 mg, 0.5 mmol, 0.05 equiv.), 2,3,4,6,7,8,9,10-octahydropyrimido[1,2-*a*]azepine (3.0 mL, 20 mmol, 1.0 equiv.) and DMSO (50 mL) were added into the flask under argon atmosphere, and then reacted in an oil bath at 80 °C for 3 h. The reaction was monitored by TLC. After the reaction was completed, water and ethyl acetate (3 × 35 mL) were added for extraction, the organic phases were mixed and then washed with brine, dried with anhydrous Na<sub>2</sub>SO<sub>4</sub>, and concentrated to remove the solvent. Purification was performed by silica gel chromatography using petroleum ether as the eluent.

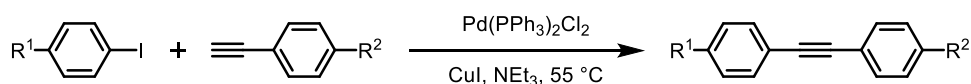

Asymmetric substrate synthesis: iodobenzene (10.0 mmol, 1.0 equiv.), phenylacetylene (11.0 mmol, 1.1 equiv.), Pd(PPh<sub>3</sub>)<sub>2</sub>Cl<sub>2</sub> (70.2 mg, 0.1 mmol, 0.01 equiv.), CuI (380 mg, 2.0 mmol, 0.2 equiv.) and triethylamine (50 mL) were added into the flask, and then stirred for 24 h in an oil bath at 55 °C under argon atmosphere. The reaction was monitored by TLC. After the reaction was completed, water and ethyl acetate (3 × 35 mL) were added for extraction, the organic phases were mixed, washed with brine, dried over anhydrous Na<sub>2</sub>SO<sub>4</sub>, and concentrated to remove the solvent. Purification was performed by silica gel chromatography using petroleum ether as the eluent.

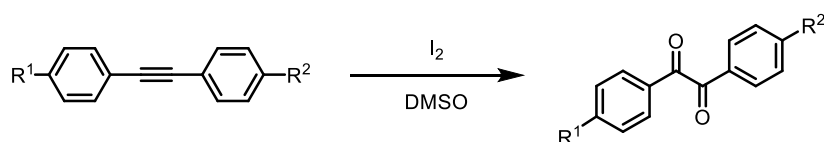

Synthesis of diketone compounds:<sup>2</sup> alkynes (3 mmol, 1.0 equiv.), I<sub>2</sub> (1.5 g, 6 mmol, 2.0 equiv.), and DMSO (50 mL) were added to the flask and then stirred and refluxed for 3 h. The reaction was monitored by TLC. After the reaction was completed, water and ethyl acetate (3 × 35 mL) were added for extraction. The organic phases were mixed, washed with brine, dried over

anhydrous Na<sub>2</sub>SO<sub>4</sub>, and concentrated to remove the solvent. Purification by silica gel chromatography (petroleum ether: ethyl acetate = 16:1).

## ii. Characterization data of starting materials

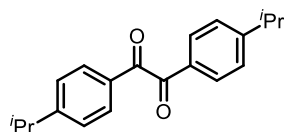

1,2-Bis(4-isopropylphenyl)ethane-1,2-dione (**1c**). Yellow solid.

**<sup>1</sup>H NMR** (600 MHz, CDCl<sub>3</sub>) δ 7.90 (d, *J* = 8.1 Hz, 4H), 7.35 (d, *J* = 8.0 Hz, 4H), 2.98 (m, 2H), 1.27 (d, *J* = 6.9 Hz, 12H). **<sup>13</sup>C NMR** (101 MHz, CDCl<sub>3</sub>) δ 194.7, 156.8, 131.1, 130.3, 127.3, 34.6, 23.7. <sup>1</sup>H and <sup>13</sup>C NMR data agreed with literature.<sup>3</sup>

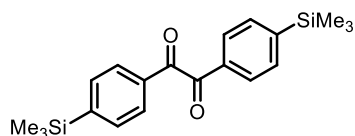

1,2-Bis(4-(trimethylsilyl)phenyl)ethane-1,2-dione (**1e**). Yellow solid. M.p. 74-76 °C.

**<sup>1</sup>H NMR** (600 MHz, CDCl<sub>3</sub>) δ 7.91 (d, *J* = 8.1 Hz, 4H), 7.66 (d, *J* = 7.8 Hz, 4H), 0.29 (s, 18H). **<sup>13</sup>C NMR** (101 MHz, CDCl<sub>3</sub>) δ 195.2, 150.0, 134.0, 133.1, 128.8, -1.3.

**IR** (KBr, ν / cm<sup>-1</sup>): 3449, 2956, 1674, 1593, 1388, 1250, 1214, 1179, 841, 749, 677.

**HRMS (ESI)** m/z: [M+H]<sup>+</sup> calcd for [C<sub>20</sub>H<sub>27</sub>O<sub>2</sub>Si<sub>2</sub>]<sup>+</sup>: 355.1176, found: 355.1178.

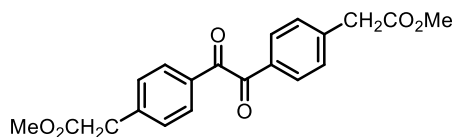

Dimethyl 2,2'-(oxalylbis(4,1-phenylene))diacetate (**1f**). Yellow solid. M.p. 57-59 °C.

**<sup>1</sup>H NMR** (400 MHz, CDCl<sub>3</sub>) δ 7.95 – 7.91 (m, 4H), 7.43 (d, *J* = 8.4 Hz, 4H), 3.71 (s, 4H), 3.70 (s, 6H). **<sup>13</sup>C NMR** (101 MHz, CDCl<sub>3</sub>) δ 194.1, 171.0, 141.5, 131.9, 130.4, 130.2, 52.5, 41.4.

**IR** (KBr, ν / cm<sup>-1</sup>): 2953, 1737, 1672, 1605, 1572, 1435, 1418, 1171, 1009, 886, 725, 578.

**HRMS (ESI)** m/z: [M+H]<sup>+</sup> calcd for [C<sub>20</sub>H<sub>19</sub>O<sub>6</sub>]<sup>+</sup>: 355.1544, found: 355.1545.

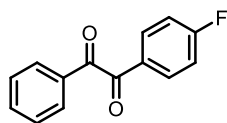

1-(4-Fluorophenyl)-2-phenylethane-1,2-dione (**1g**). Yellow solid.

**<sup>1</sup>H NMR** (600 MHz, CDCl<sub>3</sub>) δ 8.03 – 7.98 (m, 2H), 7.96 (d, *J* = 7.7 Hz, 2H), 7.65 (t, *J* = 7.1 Hz, 1H), 7.50 (t, *J* = 7.4 Hz, 2H), 7.17 (t, *J* = 7.6 Hz, 2H). **<sup>13</sup>C NMR** (101 MHz, CDCl<sub>3</sub>) δ 194.2, 192.8, 166.8 (d, *J* = 258.3 Hz), 135.1, 132.9, 132.8 (d, *J* = 9.9 Hz), 130.0, 129.6 (d, *J* = 2.9 Hz), 129.1, 116.5 (d, *J* = 22.2 Hz). **<sup>9</sup>F NMR** (565 MHz, CDCl<sub>3</sub>) δ -101.16 – -101.22 (m). <sup>1</sup>H and <sup>13</sup>C NMR data agreed with literature.<sup>4</sup>

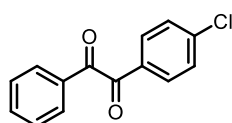

1-(4-Chlorophenyl)-2-phenylethane-1,2-dione (**1h**). Yellow solid.

**<sup>1</sup>H NMR** (600 MHz, CDCl<sub>3</sub>) δ 7.96 (d, *J* = 7.7 Hz, 2H), 7.92 (d, *J* = 8.2 Hz, 2H), 7.67 (t, *J* = 7.5 Hz, 1H), 7.54 – 7.46 (m, 4H). **<sup>13</sup>C NMR** (151 MHz, CDCl<sub>3</sub>) δ 194.0, 193.2, 141.7, 135.2, 133.0, 131.6, 131.4, 130.1, 129.6, 129.2. <sup>1</sup>H and <sup>13</sup>C NMR data agreed with literature.<sup>5</sup>

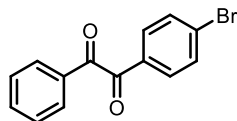

1-(4-Bromophenyl)-2-phenylethane-1,2-dione (**1i**). Yellow solid.

**<sup>1</sup>H NMR** (400 MHz, CDCl<sub>3</sub>) δ 7.98 – 7.94 (m, 2H), 7.87 – 7.81 (m, 2H), 7.66 (d, *J* = 7.3 Hz, 3H), 7.52 (t, *J* = 7.7 Hz, 2H). **<sup>13</sup>C NMR** (101 MHz, CDCl<sub>3</sub>) δ 194.0, 193.4, 135.2, 132.9, 132.6, 131.8, 131.4, 130.6, 130.1, 129.2. <sup>1</sup>H and <sup>13</sup>C NMR data agreed with literature.<sup>5</sup>

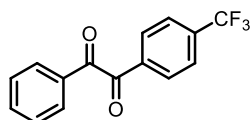

1-Phenyl-2-(4-(trifluoromethyl)phenyl)ethane-1,2-dione (**1j**). Yellow solid.

**<sup>1</sup>H NMR** (400 MHz, CDCl<sub>3</sub>) δ 8.11 (d, *J* = 8.2 Hz, 2H), 8.01 – 7.95 (m, 2H), 7.78 (d, *J* = 8.2 Hz, 2H), 7.72 – 7.66 (m, 1H), 7.54 (t, *J* = 7.8 Hz, 2H). **<sup>13</sup>C NMR** (101 MHz, CDCl<sub>3</sub>) δ 193.5, 193.0, 135.8 (d, *J* = 32.9 Hz), 135.6, 135.2, 132.6, 130.2, 130.0, 129.2, 126.0 (d, *J* = 3.7 Hz), 123.3 (q, *J* = 273.1 Hz). **<sup>19</sup>F NMR** (565 MHz, CDCl<sub>3</sub>) δ -63.4. <sup>1</sup>H and <sup>13</sup>C NMR data agreed with literature.<sup>6</sup>

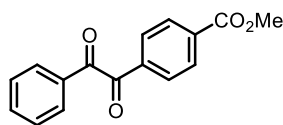

Methyl 4-(2-oxo-2-phenylacetyl)benzoate (**1k**). Yellow solid.

**<sup>1</sup>H NMR** (400 MHz, CDCl<sub>3</sub>) δ 8.19 – 8.14 (m, 2H), 8.07 – 8.02 (m, 2H), 8.01 – 7.95 (m, 2H), 7.68 (tt, *J* = 7.0, 1.3 Hz, 1H), 7.58 – 7.50 (m, 2H), 3.96 (s, 3H). **<sup>13</sup>C NMR** (101 MHz, CDCl<sub>3</sub>) δ 194.0, 193.8, 166.1, 136.2, 135.5, 135.3, 132.8, 130.3, 130.1, 129.9, 129.3, 52.8. <sup>1</sup>H and <sup>13</sup>C NMR data agreed with literature.<sup>7</sup>

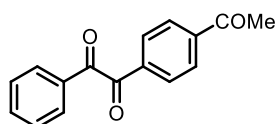

1-(4-Acetylphenyl)-2-phenylethane-1,2-dione (**1l**). Pale yellow solid.

**<sup>1</sup>H NMR** (400 MHz, CDCl<sub>3</sub>) δ 8.07 (s, 4H), 8.00 – 7.94 (m, 2H), 7.72 – 7.64 (m, 1H), 7.53 (t, *J* = 7.8 Hz, 2H), 2.66 (s, 3H). **<sup>13</sup>C NMR** (101 MHz, CDCl<sub>3</sub>) δ 197.4, 193.9, 193.8, 141.4, 136.1, 135.4, 132.7, 130.3, 130.1, 129.3, 128.9, 27.2. <sup>1</sup>H and <sup>13</sup>C NMR data agreed with literature.<sup>5</sup>

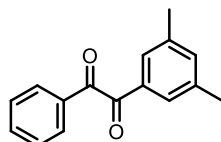

1-(3,5-Dimethylphenyl)-2-phenylethane-1,2-dione (**1m**). Pale yellow oil.

**<sup>1</sup>H NMR** (600 MHz, CDCl<sub>3</sub>) δ 7.97 – 7.92 (m, 2H), 7.62 (t, *J* = 7.4 Hz, 1H), 7.56 (s, 2H), 7.48 (t, *J* = 7.7 Hz, 2H), 2.33 (s, 6H). **<sup>13</sup>C NMR** (151 MHz, CDCl<sub>3</sub>) δ 195.2, 194.9, 138.9, 136.8, 134.9, 133.1, 130.0, 129.1, 127.6, 21.2. <sup>1</sup>H and <sup>13</sup>C NMR data agreed with literature.<sup>8</sup>

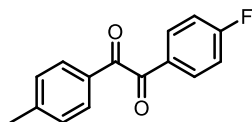

1-(4-Fluorophenyl)-2-(*p*-tolyl)ethane-1,2-dione (**1n**). Yellow solid.

$^1\text{H NMR}$  (400 MHz,  $\text{CDCl}_3$ )  $\delta$  8.04 – 7.98 (m, 2H), 7.86 (d,  $J = 8.1$  Hz, 2H), 7.31 (d,  $J = 8.0$  Hz, 2H), 7.18 (t,  $J = 8.6$  Hz, 2H), 2.44 (s, 3H).  $^{13}\text{C NMR}$  (101 MHz,  $\text{CDCl}_3$ )  $\delta$  194.0, 193.1, 166.8 (d,  $J = 258.1$  Hz), 146.6, 132.9 (d,  $J = 9.8$  Hz), 130.5, 130.2, 129.9, 129.7 (d,  $J = 2.9$  Hz), 116.5 (d,  $J = 22.1$  Hz), 22.1.  $^{19}\text{F NMR}$  (565 MHz,  $\text{CDCl}_3$ )  $\delta$  -97.4 – -106.8 (m).  $^1\text{H}$  and  $^{13}\text{C}$  NMR data agreed with literature.<sup>7</sup>

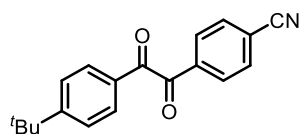

4-(2-(4-(*Tert*-butyl)phenyl)-2-oxoacetyl)benzonitrile (**1o**). Yellow solid.

$^1\text{H NMR}$  (400 MHz,  $\text{CDCl}_3$ )  $\delta$  8.08 (d,  $J = 8.5$  Hz, 2H), 7.90 (d,  $J = 8.6$  Hz, 2H), 7.80 (d,  $J = 8.5$  Hz, 2H), 7.55 (d,  $J = 8.6$  Hz, 2H), 1.34 (s, 9H).  $^{13}\text{C NMR}$  (151 MHz,  $\text{CDCl}_3$ )  $\delta$  192.8, 192.7, 159.8, 136.2, 132.8, 130.3, 130.2, 130.1, 126.4, 117.9, 117.7, 35.6, 31.1, 31.0.  $^1\text{H}$  and  $^{13}\text{C}$  NMR data agreed with literature.<sup>9</sup>

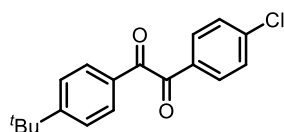

1-(4-(*Tert*-butyl)phenyl)-2-(4-chlorophenyl)ethane-1,2-dione (**1p**). Yellow solid.

$^1\text{H NMR}$  (600 MHz,  $\text{CDCl}_3$ )  $\delta$  7.91 (dd,  $J = 12.0, 8.1$  Hz, 4H), 7.53 (d,  $J = 8.0$  Hz, 2H), 7.48 (d,  $J = 8.1$  Hz, 2H), 1.34 (s, 9H).  $^{13}\text{C NMR}$  (151 MHz,  $\text{CDCl}_3$ )  $\delta$  193.7, 193.4, 159.4, 141.6, 131.7, 131.3, 130.5, 130.1, 129.5, 126.2, 35.6, 31.1.  $^1\text{H}$  and  $^{13}\text{C}$  NMR data agreed with literature.<sup>8</sup>

## VII. Cross-coupling reaction of two different benzil derivatives

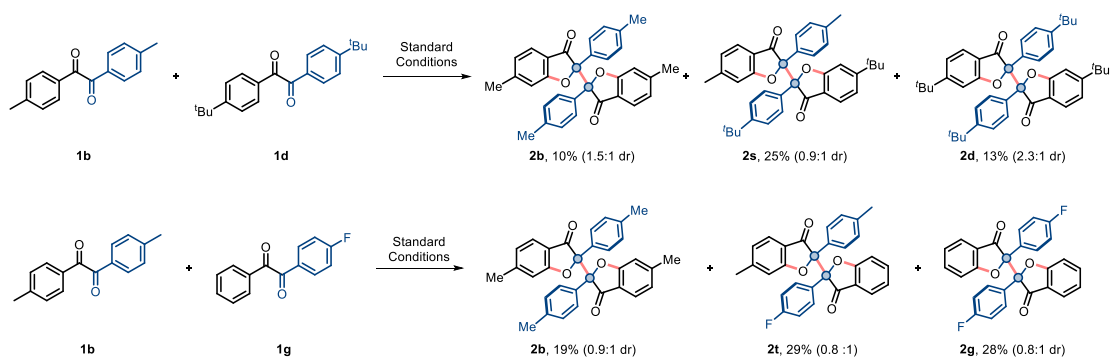

To a 20 mL dry glass tube with a stir bar were added **1b** (23.8 mg, 0.1 mmol, 1.0 equiv.), **1d** (32.2 mg, 0.1 mmol, 1.0 equiv.) or **1g** (22.8 mg, 0.1 mmol, 1.0 equiv.),  $\text{Ce}(\text{SO}_4)_2$  (66.4 mg, 0.2 mmol, 2.0 equiv.),  $\text{H}_2\text{O}$  (60  $\mu\text{L}$ ), and DMSO (1 mL). The reaction mixture was evacuated by three freeze-pump-thaw cycles and back-filled with ultra-purified argon. Then mixture was then stirred

at room temperature and irradiated with 405 nm light for 24 h. After the reaction, the mixture was then filtered with celite, and extracted with ethyl acetate (3×5 mL). The combined organic phases were washed with brine (10 mL) and then dried over anhydrous Na<sub>2</sub>SO<sub>4</sub>. The organic layers were concentrated in vacuo, and the crude product was purified by preparative TLC on silica gel to afford the product (Petroleum ether/ethyl acetate = 8:1, then use CHCl<sub>3</sub> as eluent for separation). The dr value was determined based on the isolated yields. When **1b** and **1d** were used as substrates, products **2b**, **2s**, and **2d** were obtained with a total yield of 48%, in a ratio of 1:2.5:1.3. **2b-1** 1.5 mg, 6%; **2b-2** 1.0 mg, 4%; **2s-1** 3.3 mg, 12%; **2s-2** 3.5 mg, 13%; **2d-1** 3.2 mg, 9%; **2d-2** 1.4 mg, 4%. Similarly, using **1b** and **1g** as substrates resulted in the formation of **2b**, **2t**, and **2g** with a total yield of 76%, in a ratio of 1:1.5:1.5. **2b-1** 2.1 mg, 9%; **2b-2** 2.4 mg, 10%; **2t-1** 3.0 mg, 13%; **2t-2** 3.7 mg, 16%; **2g-1** 2.8 mg, 12%; **2g-2** 3.6 mg, 16%.

## VIII. Investigation of the Mechanism

### i. TEMPO was used as radical scavenger

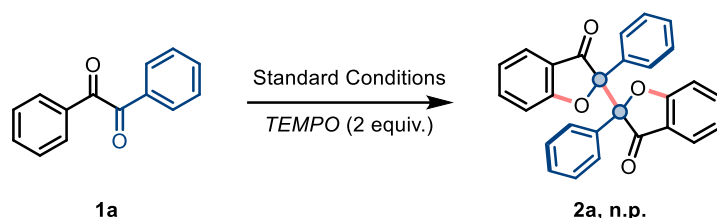

To a 20 mL dry glass tube with a stir bar were added benzil (21.0 mg, 0.1 mmol, 1.0 equiv.), Ce(SO<sub>4</sub>)<sub>2</sub> (33.2 mg, 0.1 mmol, 1.0 equiv.), 2,2,6,6-tetramethyl-1-piperidinyloxy (31.2 mg, 0.2 mmol, 2.0 equiv.), H<sub>2</sub>O (60 μL), and DMSO (1 mL). The reaction mixture was evacuated by three freeze-pump-thaw cycles and back-filled with ultra-purified argon. Then mixture was then stirred at room temperature and irradiated with 405 nm light for 24 h. After the reaction, the mixture was then filtered with celite, and extracted with ethyl acetate (3×5 mL). The combined organic phases were washed with brine (10 mL) and then dried over anhydrous Na<sub>2</sub>SO<sub>4</sub>. The desired product **2a** was not observed, as determined by <sup>1</sup>H NMR analysis.

### ii. BHT was used as radical scavenger

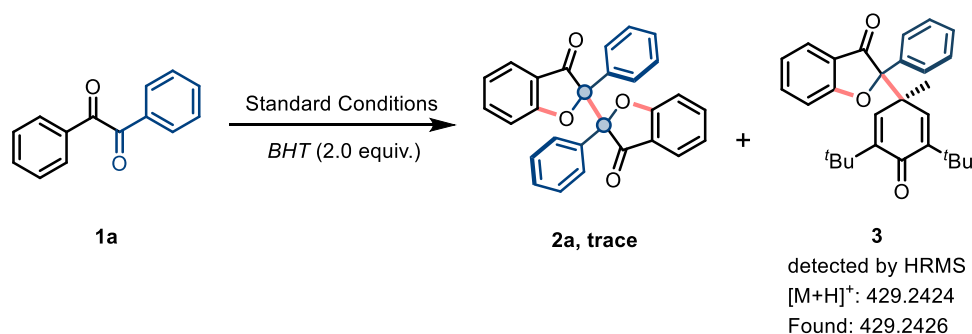

To a 20 mL dry glass tube with a stir bar were added benzil (21.0 mg, 0.1 mmol, 1.0 equiv.), Ce(SO<sub>4</sub>)<sub>2</sub> (33.2 mg, 0.1 mmol, 1.0 equiv.), 2,6-di-*tert*-butyl-4-methylphenol (44.0 mg, 0.2 mmol, 2.0 equiv.), H<sub>2</sub>O (60 μL), and DMSO (1 mL). The reaction mixture was evacuated by three freeze-pump-thaw cycles and back-filled with ultra-purified argon. The mixture was then stirred at room temperature and irradiated with 405 nm light for 24 h. After the reaction, it was filtered with celite and extracted with ethyl acetate (3×5 mL). The combined organic phases were washed with

brine (10 mL), and then dried over anhydrous  $\text{Na}_2\text{SO}_4$ . Only trace amounts **2a** were observed on the  $^1\text{H}$  NMR spectrum.

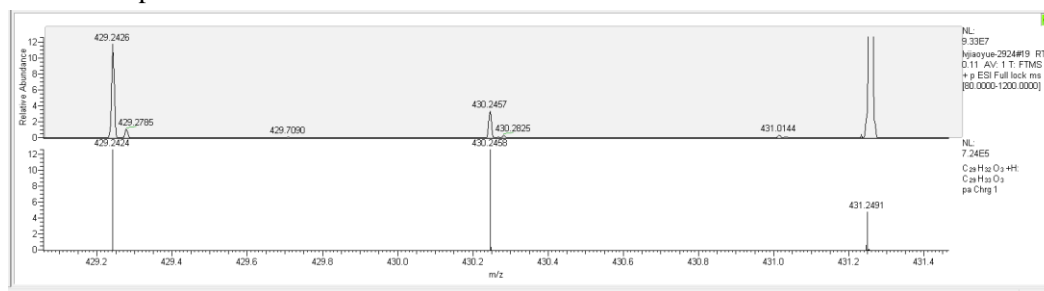

**Figure S3.** HRMS of reaction intermediates captured by TEMPO

### iii. Investigate the role of $\text{Ce}(\text{SO}_4)_2$ in the reaction

Preparation of the mixture of cerium sulfate and benzil: benzil (210 mg, 1 mmol, 1.0 equiv.) and  $\text{Ce}(\text{SO}_4)_2$  (332 mg, 1 mmol, 1.0 equiv.), and acetonitrile (10 mL) were stirred at room temperature for 2 h in the dark. Then the solvent was removed under vacuum.

The Raman spectrum was measured using HORIBA LaRAM HR Evolution with a 532 nm laser.<sup>10</sup>

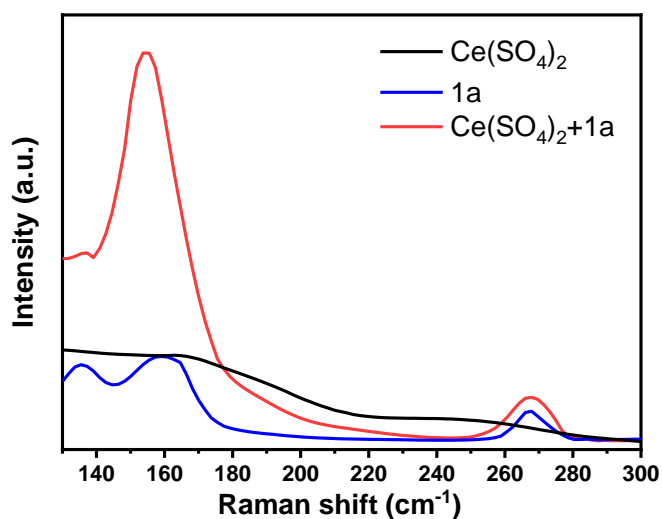

**Figure S4.** Raman spectrum of **1a**,  $\text{Ce}(\text{SO}_4)_2$  and the mixture

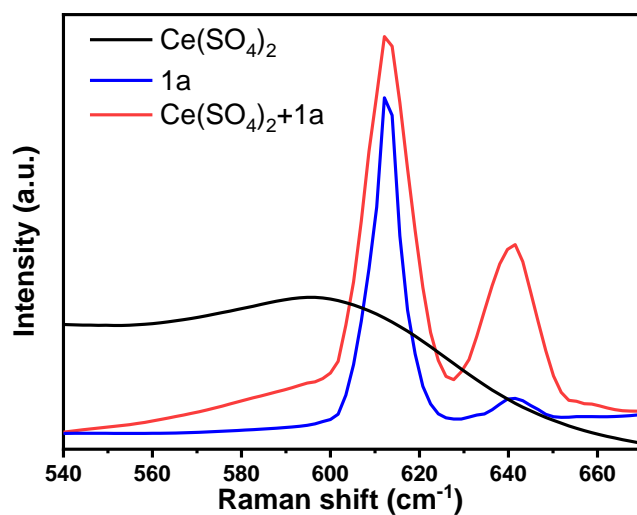

**Figure S5.** Raman spectrum of **1a**, Ce(SO<sub>4</sub>)<sub>2</sub> and the mixture

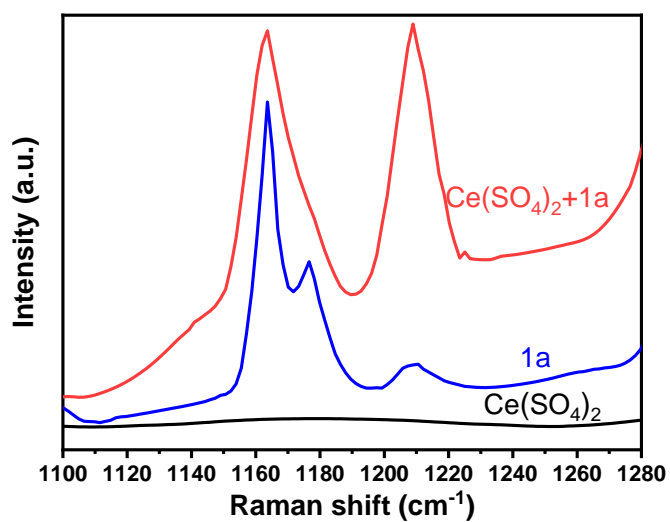

**Figure S6.** Raman spectrum of **1a**, Ce(SO<sub>4</sub>)<sub>2</sub> and the mixture

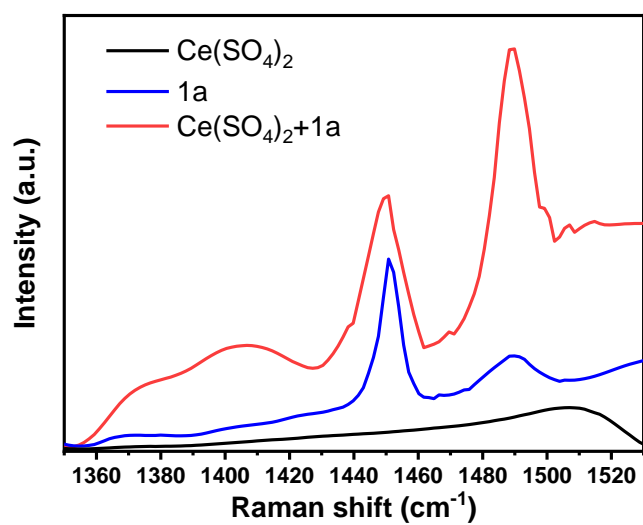



**Figure S7.** Raman spectrum of **1a**,  $\text{Ce}(\text{SO}_4)_2$  and the mixture

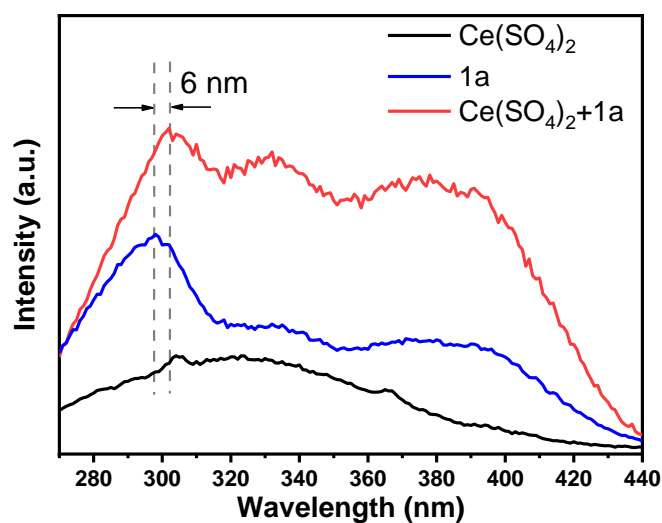

**Figure S8.** Excitation spectrum of **1a**,  $\text{Ce}(\text{SO}_4)_2$  and the mixture

The excitation spectrum was measured using HORIBA Fluorolog TCSPC at a fixed emission wavelength of 488 nm with a 1nm slit. The excitation wavelength of **1a** red-shifted with the addition of  $\text{Ce}(\text{SO}_4)_2$ , and the energy decreased.

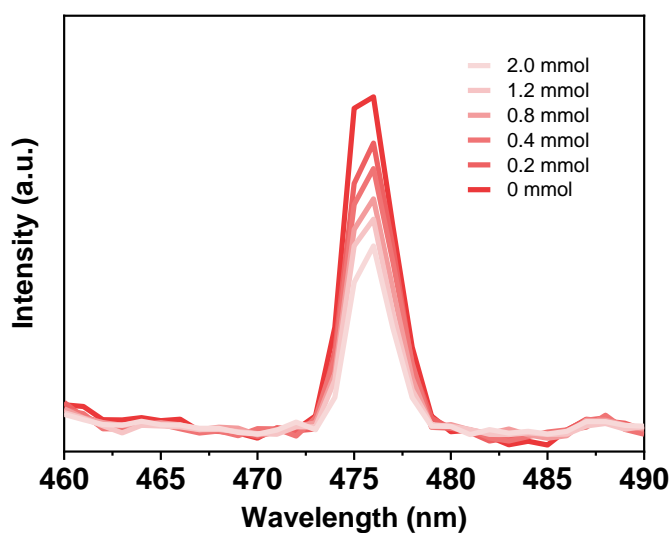

**Figure S9.** Quenching of the  $\text{Ce}(\text{SO}_4)_2$  in the presence of **1a**

Fluorescence quenching experiments were performed using a HORIBA Instruments Incorporated spectrofluorometer. The excitation wavelength was fixed at 350 nm and the emission intensity was collected at 488 nm. Sample preparation:  $\text{Ce}(\text{SO}_4)_2$  (1 mmol) and different amounts of **1a** (0.2, 0.4, 0.8, 1.2, and 2 mmol) were added to 10 mL of acetonitrile and stirred at room temperature for 2 h in the dark. The solvent was removed under vacuum, and the resulting solid mixture was tested for fluorescence.

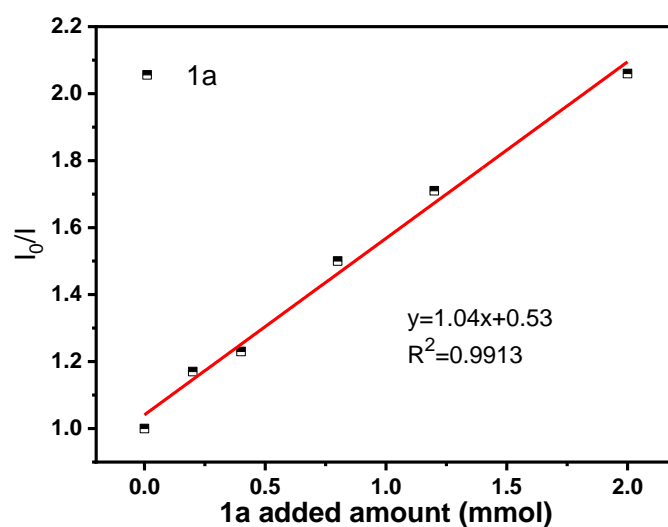

**Figure S10.** Stern-Volmer quenching plot

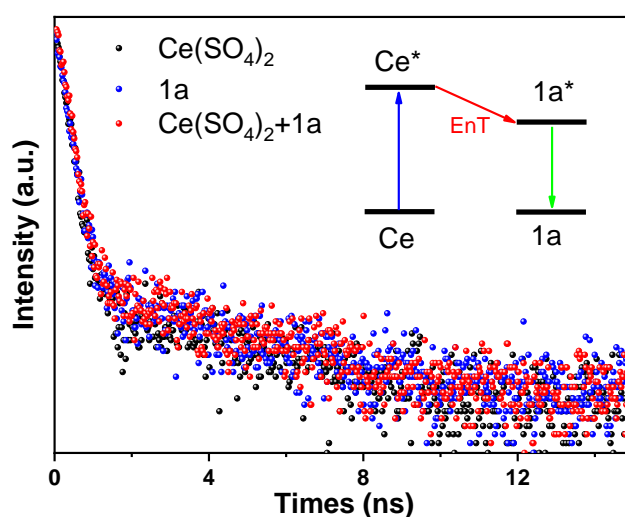

**Figure S11.** Fluorescence lifetime experiments of benzil,  $\text{Ce}(\text{SO}_4)_2$  and the mixture

The data were fitted according to the following equation, where  $\tau$  is the fluorescence lifetime. The results are shown in the table below:

$$Y = A \cdot \exp(-t/\tau) + Y_0$$

**Table S11.** Fluorescence lifetime fitting

|                            | A          | $\tau$  | $Y_0$    |
|----------------------------|------------|---------|----------|
| $\text{Ce}(\text{SO}_4)_2$ | 2071.44019 | 0.68747 | 16.04004 |
| Benzil                     | 2003.93199 | 0.69443 | 19.21576 |
| the mixture                | 2187.39667 | 0.70916 | 18.3161  |

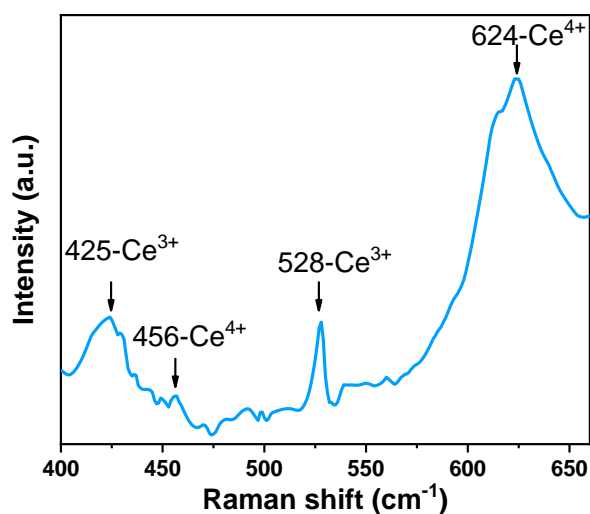

**Figure S12.** Raman spectrum of solid sample after reaction

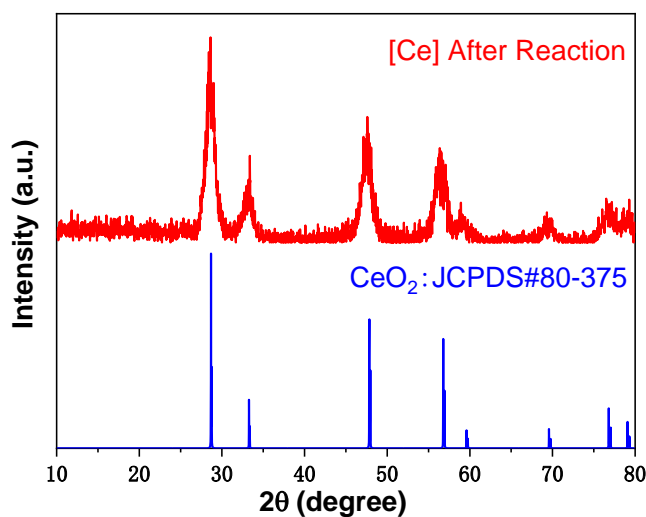

**Figure S13.** XRD of the solid sample after the reaction

XRD was tested on a Rigaku MiNiFlex600 using Cu K $\alpha$  rays ( $\lambda = 0.1542$ ) from 10-80° at 40 kV. Sample preparation: After the reaction, the solid was isolated by centrifugation, then washed with water and oven dried.

XPS was tested on SHIMADZU Axis Supra. The XPS spectra demonstrate that the peak at 907.55 eV belongs to Ce<sup>3+</sup>,<sup>11</sup> confirming the presence of Ce<sup>3+</sup> after the reaction.

Sample preparation for XPS: After the reaction, the solid was separated by centrifugation, washed with water and dried in a vacuum drying oven for 2 h, and then sent for testing under argon.

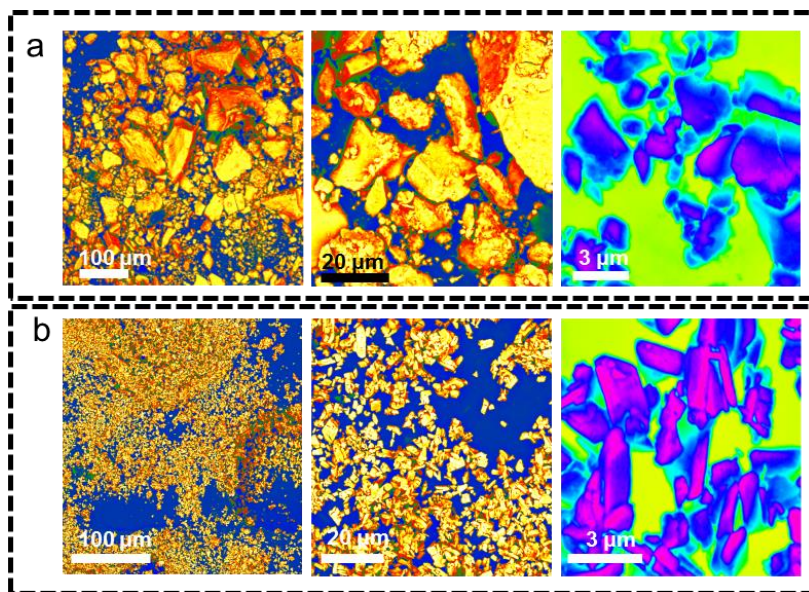

**Figure S14.** SEM of cerium sulfate before reaction (a) and solid samples after reaction (b)

SEM was tested on Phenom desktop scanning electron microscope. It is obvious that the particle size of cerium becomes smaller and more uniform in the SEM images before and after the reaction.

## IX. Characterization Data for Products

### 2, 2'-Diphenyl-[2,2'-bibenzofuran]-3,3'(2*H*, 2'*H*)-dione (2a).

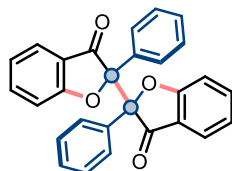

White solid, 17.1 mg, 82%. Eluent (Petroleum ether/ethyl acetate = 8:1). M.p. = 184 – 185 °C.

**<sup>1</sup>H NMR** (600 MHz, CDCl<sub>3</sub>) δ 7.62 (dd, *J* = 7.7, 1.4 Hz, 1H), 7.58 – 7.52 (m, 5H), 7.50 – 7.48 (m, 2H), 7.34 – 7.27 (m, 2H), 7.25 – 7.22 (m, 4H), 7.13 (dd, *J* = 8.3, 0.9 Hz, 1H), 7.06 – 6.99 (m, 3H).

**<sup>13</sup>C NMR** (101 MHz, CDCl<sub>3</sub>) δ 196.7, 196.4, 171.2, 170.9, 138.1, 138.0, 131.3, 131.0, 129.0, 128.1, 128.0, 127.4, 127.3, 124.9, 124.7, 122.4, 122.3, 121.7, 121.3, 113.3, 112.9, 90.6, 90.0.

**IR** (KBr, *v* / cm<sup>-1</sup>): 3070, 2562, 1720, 1611, 1463, 1198, 999, 760, 706.

**HRMS (ESI)** *m/z*: [M+H]<sup>+</sup>calcd for [C<sub>28</sub>H<sub>19</sub>O<sub>4</sub>]<sup>+</sup>: 419.1278, found: 419.1278.

### 6,6'-Dimethyl-2,2'-di-*p*-tolyl-[2,2'-bibenzofuran]-3,3'(2*H*,2'*H*)-dione (2b).

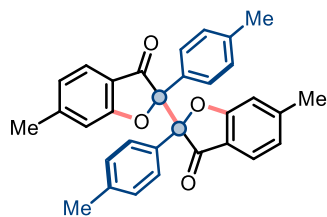

White solid, 14.1 mg, 60%. Eluent (Petroleum ether/ethyl acetate = 8:1).

***Cis*-6,6'-dimethyl-2,2'-di-*p*-tolyl-[2,2'-bibenzofuran]-3,3'(2*H*,2'*H*)-dione (2b-1).**

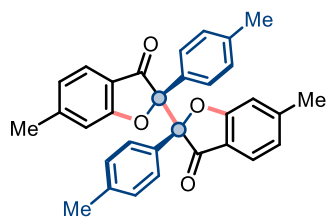

White solid. M.p. = 262 – 263 °C.

**<sup>1</sup>H NMR** (400 MHz, CDCl<sub>3</sub>) δ 7.48 (d, *J* = 8.2 Hz, 2H), 7.38 (d, *J* = 8.4 Hz, 4H), 7.05 (d, *J* = 8.1 Hz, 4H), 6.83 (d, *J* = 7.5 Hz, 4H), 2.37 (s, 6H), 2.32 (s, 6H). **<sup>13</sup>C NMR** (101 MHz, CDCl<sub>3</sub>) δ 196.3, 171.8, 149.9, 138.6, 128.6, 128.0, 127.9, 124.5, 123.7, 119.0, 113.1, 90.3, 22.7, 21.3. <sup>1</sup>H and <sup>13</sup>C NMR data have been reported in literature.<sup>12</sup>

**IR** (KBr, ν / cm<sup>-1</sup>): 2918, 1717, 1617, 1327, 1142, 1026, 812, 514.

**HRMS (ESI)** m/z: [M+H]<sup>+</sup> calcd for [C<sub>32</sub>H<sub>27</sub>O<sub>4</sub>]<sup>+</sup>: 475.1904, found: 475.1904.

***Trans*-6,6'-dimethyl-2,2'-di-*p*-tolyl-[2,2'-bibenzofuran]-3,3'(2*H*,2'*H*)-dione (2b-2).**

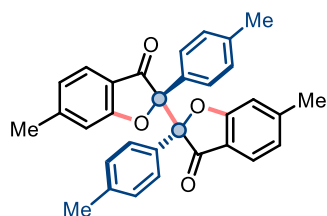

White solid. M.p. = 246 – 247 °C.

**<sup>1</sup>H NMR** (600 MHz, CDCl<sub>3</sub>) δ 7.45 (d, *J* = 8.0 Hz, 2H), 7.38 (d, *J* = 8.1 Hz, 4H), 7.05 (d, *J* = 7.9 Hz, 4H), 6.90 (s, 2H), 6.82 (d, *J* = 7.8 Hz, 2H), 2.38 (s, 6H), 2.30 (s, 6H). **<sup>13</sup>C NMR** (151 MHz, CDCl<sub>3</sub>) δ 195.8, 171.4, 149.8, 138.7, 128.8, 128.1, 128.0, 124.4, 123.8, 119.5, 113.3, 91.3, 22.7, 21.3. <sup>1</sup>H and <sup>13</sup>C NMR data have been reported in literature.<sup>12</sup>

**IR** (KBr, ν / cm<sup>-1</sup>): 2917, 1721, 1617, 1452, 1327, 1023, 812, 793, 755.

**HRMS (ESI)** m/z: [M+H]<sup>+</sup> calcd for [C<sub>32</sub>H<sub>27</sub>O<sub>4</sub>]<sup>+</sup>: 475.1904, found: 475.1904.

**6,6'-Diisopropyl-2,2'-bis(4-isopropylphenyl)-[2,2'-bibenzofuran]-3,3'(2*H*,2'*H*)-dione (2c).**

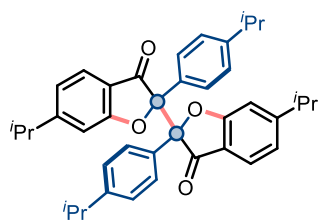

White solid, 19.5 mg, 67%. Eluent (Petroleum ether/ethyl acetate = 8:1).

***Cis*-6,6'-diisopropyl-2,2'-bis(4-isopropylphenyl)-[2,2'-bibenzofuran]-3,3'(2*H*,2'*H*)-dione (2c-1).**

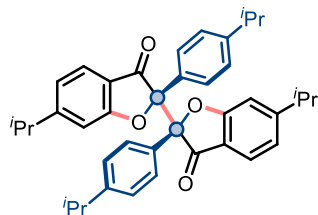

White solid, M.p. = 100 – 102 °C.

**<sup>1</sup>H NMR** (400 MHz, CDCl<sub>3</sub>) δ 7.50 (d, *J* = 7.9 Hz, 2H), 7.40 (d, *J* = 8.4 Hz, 4H), 7.08 (d, *J* = 8.5 Hz, 4H), 6.90 – 6.82 (m, 4H), 2.88 (dp, *J* = 10.4, 6.9 Hz, 4H), 1.23 – 1.19 (m, 24H). **<sup>13</sup>C NMR** (101 MHz, CDCl<sub>3</sub>) δ 196.4, 172.0, 160.7, 149.5, 129.0, 128.1, 125.2, 124.6, 121.4, 119.5, 110.3, 90.5, 35.1, 33.9, 24.1, 24.0, 23.6, 23.6.

**IR** (KBr, *v* / cm<sup>-1</sup>): 2961, 1720, 1618, 1437, 1119, 939, 825, 736.

**HRMS (ESI)** *m/z*: [M+H]<sup>+</sup> calcd for [C<sub>40</sub>H<sub>43</sub>O<sub>4</sub>]<sup>+</sup>: 587.3156, found: 587.3154.

***Trans*-6,6'-diisopropyl-2,2'-bis(4-isopropylphenyl)-[2,2'-bibenzofuran]-3,3'(2*H*,2'*H*)-dione (2c-2).**

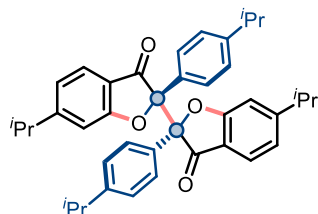

White solid, M.p. = 222 – 224 °C.

**<sup>1</sup>H NMR** (400 MHz, CDCl<sub>3</sub>) δ 7.45 (dd, *J* = 8.3, 2.4 Hz, 6H), 7.07 (d, *J* = 8.4 Hz, 4H), 6.97 (s, 2H), 6.85 (dd, *J* = 8.0, 1.3 Hz, 2H), 2.87 (dp, *J* = 24.6, 6.9 Hz, 4H), 1.23 (dd, *J* = 6.9, 3.5 Hz, 12H), 1.18 (dd, *J* = 6.9, 1.4 Hz, 12H). **<sup>13</sup>C NMR** (101 MHz, CDCl<sub>3</sub>) δ 196.0, 171.6, 160.6, 149.5, 129.1, 128.1, 125.4, 124.4, 121.5, 119.8, 110.7, 91.2, 35.1, 33.9, 24.0, 23.6.

**IR** (KBr, *v* / cm<sup>-1</sup>): 2960, 2925, 1721, 1617, 1509, 1436, 1326, 1117, 1005, 803, 768, 457.

**HRMS (ESI)** *m/z*: [M+H]<sup>+</sup> calcd for [C<sub>40</sub>H<sub>43</sub>O<sub>4</sub>]<sup>+</sup>: 587.3156, found: 587.3154.

**6,6'-Di-*tert*-butyl-2,2'-bis(4-(*tert*-butyl)phenyl)-[2,2'-bibenzofuran]-3,3'(2*H*,2'*H*)-dione (2d).**

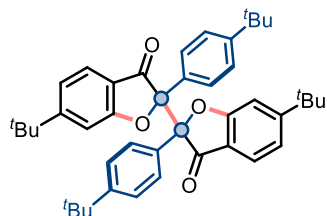

White solid, 17.6 mg, 55%. Eluent (Petroleum ether/ethyl acetate = 8:1).

***Cis*-6,6'-di-*tert*-butyl-2,2'-bis(4-(*tert*-butyl)phenyl)-[2,2'-bibenzofuran]-3,3'(2*H*,2'*H*)-dione (2d-1).**

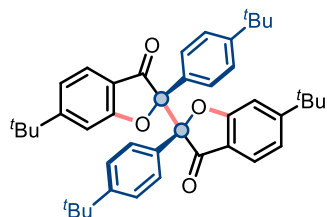

White solid, M.p. = 310 – 311 °C.

**<sup>1</sup>H NMR** (400 MHz, CDCl<sub>3</sub>) δ 7.51 (d, *J* = 8.2 Hz, 2H), 7.43 – 7.39 (m, 4H), 7.25 – 7.22 (m, 4H), 7.07 (dd, *J* = 8.2, 1.5 Hz, 2H), 7.00 (d, *J* = 1.4 Hz, 2H), 1.27 (d, *J* = 4.1 Hz, 36H). **<sup>13</sup>C NMR** (101 MHz, CDCl<sub>3</sub>) δ 196.5, 172.0, 163.0, 151.7, 128.7, 127.7, 124.1, 124.1, 120.2, 119.0, 109.5, 90.4, 36.0, 34.6, 31.4, 31.1.

**IR** (KBr, *v* / cm<sup>-1</sup>): 2963, 2869, 1723, 1619, 1597, 1428, 1273, 1197, 934, 825, 713, 558.

**HRMS (ESI)** *m/z*: [M+H]<sup>+</sup> calcd for [C<sub>44</sub>H<sub>51</sub>O<sub>4</sub>]<sup>+</sup>: 643.3782, found: 643.3779.

***Trans*-6,6'-di-*tert*-butyl-2,2'-bis(4-(*tert*-butyl)phenyl)-[2,2'-bibenzofuran]-3,3'(2*H*,2'*H*)-dione (2d-2).**

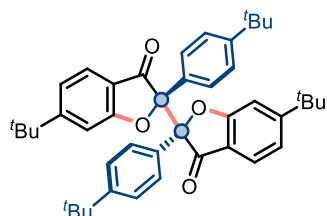

White solid, M.p. = 280 – 282 °C.

**<sup>1</sup>H NMR** (400 MHz, CDCl<sub>3</sub>) δ 7.48 (d, *J* = 8.6 Hz, 4H), 7.44 (d, *J* = 8.2 Hz, 2H), 7.22 (d, *J* = 8.6 Hz, 4H), 7.13 (d, *J* = 1.5 Hz, 2H), 7.02 (dd, *J* = 8.2, 1.5 Hz, 2H), 1.29 (s, 18H), 1.25 (s, 18H). **<sup>13</sup>C NMR** (101 MHz, CDCl<sub>3</sub>) δ 196.2, 171.6, 162.9, 151.7, 128.8, 127.8, 124.2, 124.0, 120.3, 119.3, 109.9, 91.2, 36.0, 34.6, 31.4, 31.1.

**IR** (KBr, *v* / cm<sup>-1</sup>): 2960, 2924, 2869, 1726, 1618, 1597, 1427, 1266, 1027, 934, 826, 713, 557.

**HRMS (ESI)** *m/z*: [M+H]<sup>+</sup> calcd for [C<sub>44</sub>H<sub>51</sub>O<sub>4</sub>]<sup>+</sup>: 643.3782, found: 643.3781.

**6,6'-Bis(trimethylsilyl)-2,2'-bis(4-(trimethylsilyl)phenyl)-[2,2'-bibenzofuran]-3,3'(2*H*,2'*H*)-dione (2e).**

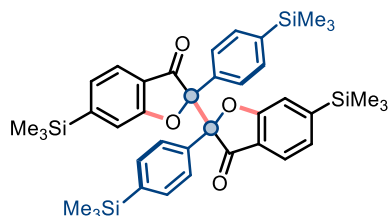

White solid, 30.2 mg, 86%. Eluent (Petroleum ether/ethyl acetate = 64:1).

M.p. = 129 – 130 °C.

**<sup>1</sup>H NMR** (600 MHz, CDCl<sub>3</sub>) δ 7.51 (dd, *J* = 15.3, 7.6 Hz, 2H), 7.46 (t, *J* = 8.6 Hz, 4H), 7.37 (t, *J* = 7.4 Hz, 4H), 7.24 – 7.10 (m, 4H), 0.25 – 0.18 (m, 36H). **<sup>13</sup>C NMR** (101 MHz, CDCl<sub>3</sub>) δ 197.0,

196.5, 170.8, 170.3, 154.2, 154.0, 141.3, 141.2, 132.4, 132.2, 131.9, 127.3, 127.3, 126.9, 126.8, 123.7, 123.6, 121.8, 121.5, 117.8, 117.5, 91.0, 89.9, -1.0, -1.3.

**IR** (KBr,  $\nu / \text{cm}^{-1}$ ): 2955, 2360, 1727, 1609, 1584, 1402, 1316, 1249, 1113, 840, 727.

**HRMS (ESI)**  $m/z$ :  $[M+H]^+$  calcd for  $[\text{C}_{40}\text{H}_{51}\text{O}_4\text{Si}_4]^+$ : 707.2859, found: 707.2859.

### Dimethyl

**2,2'-((6,6'-bis(2-methoxy-2-oxoethyl)-3,3'-dioxo-[2,2'-bibenzofuran]-2,2'(3*H*,3'*H*)-diyl)bis(4,1-phenylene))diacetate (2f).**

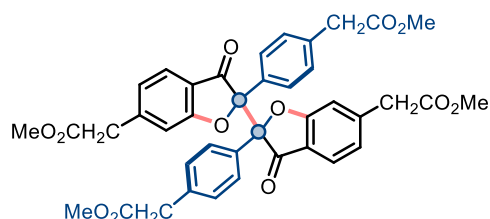

White solid, 27.2 mg, 77%. Eluent (Petroleum ether/ethyl acetate = 1:1).

M.p. = 79 – 80 °C.

**<sup>1</sup>H NMR** (400 MHz,  $\text{CDCl}_3$ )  $\delta$  7.53 (t,  $J = 8.0$  Hz, 2H), 7.41 (dd,  $J = 8.4, 1.8$  Hz, 4H), 7.15 (dd,  $J = 8.3, 5.9$  Hz, 4H), 7.05 (s, 1H), 6.98 – 6.94 (m, 3H), 3.69 (d,  $J = 7.5$  Hz, 6H), 3.65 (d,  $J = 2.7$  Hz, 10H), 3.60 (d,  $J = 2.9$  Hz, 4H). **<sup>13</sup>C NMR** (101 MHz,  $\text{CDCl}_3$ )  $\delta$  196.0, 195.5, 171.9, 171.4, 171.0, 170.8, 170.7, 145.0, 144.9, 134.9, 134.9, 130.0, 129.9, 128.4, 128.3, 128.2, 124.9, 124.8, 124.0, 123.9, 120.6, 120.2, 114.0, 113.8, 91.2, 90.1, 52.5, 52.5, 52.2, 41.8, 41.7, 41.0, 41.0.

**IR** (KBr,  $\nu / \text{cm}^{-1}$ ): 2953, 2848, 1735, 1618, 1599, 1439, 1328, 1262, 1143, 1011, 735.

**HRMS (ESI)**  $m/z$ :  $[M+H]^+$  calcd for  $[\text{C}_{40}\text{H}_{35}\text{O}_{12}]^+$ : 707.2123, found: 707.2123.

**2,2'-Bis(4-fluorophenyl)-[2,2'-bibenzofuran]-3,3'(2*H*,2'*H*)-dione (2g).**

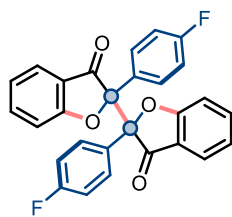

White solid, 13.8 mg, 61%. Eluent (Petroleum ether/ethyl acetate = 8:1).

**Cis-2,2'-bis(4-fluorophenyl)-[2,2'-bibenzofuran]-3,3'(2*H*,2'*H*)-dione (2g-1).**

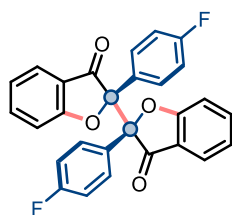

White solid. The melting point of this compound is above 300 °C, which cannot be measured by a micro melting point meter.



**<sup>1</sup>H NMR** (400 MHz, CDCl<sub>3</sub>) δ 7.63 (dd, *J* = 7.8, 1.4 Hz, 2H), 7.55 (ddd, *J* = 8.5, 7.2, 1.5 Hz, 2H), 7.48 – 7.43 (m, 4H), 7.09 – 7.04 (m, 2H), 7.01 – 6.92 (m, 6H). **<sup>13</sup>C NMR** (101 MHz, CDCl<sub>3</sub>) δ 196.5, 171.1, 163.4 (d, *J* = 248.7 Hz), 138.3, 130.0 (d, *J* = 8.4 Hz), 126.7 (d, *J* = 3.0 Hz), 125.0, 122.6, 121.2, 114.4 (d, *J* = 21.5 Hz), 112.9, 89.5.

**<sup>19</sup>F NMR** (376 MHz, CDCl<sub>3</sub>) δ -112.4.

**IR** (KBr, *v* / cm<sup>-1</sup>): 2919, 2850, 1722, 1611, 1506, 1463, 1299, 1230, 1163, 1018, 755, 515.

**HRMS (ESI)** *m/z*: [M+H]<sup>+</sup> calcd for [C<sub>28</sub>H<sub>17</sub>F<sub>2</sub>O<sub>4</sub>]<sup>+</sup>: 455.1089, found: 455.1089.

***Trans*-2,2'-bis(4-fluorophenyl)-[2,2'-bibenzofuran]-3,3'(2*H*,2'*H*)-dione (2g-2).**

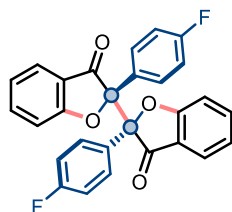

White solid, M.p. = 210 – 211 °C.

**<sup>1</sup>H NMR** (400 MHz, CDCl<sub>3</sub>) δ 7.60 – 7.51 (m, 8H), 7.12 (d, *J* = 8.7 Hz, 2H), 7.04 (t, *J* = 7.4 Hz, 2H), 6.94 (t, *J* = 8.8 Hz, 4H). **<sup>13</sup>C NMR** (101 MHz, CDCl<sub>3</sub>) δ 196.2, 170.8, 163.3 (d, *J* = 249.0 Hz), 138.3, 130.0 (d, *J* = 8.4 Hz), 126.9 (d, *J* = 2.8 Hz), 124.8, 122.7, 121.5, 114.5 (d, *J* = 21.6 Hz), 113.3, 90.1.

**<sup>19</sup>F NMR** (376 MHz, CDCl<sub>3</sub>) δ -112.4.

**IR** (KBr, *v* / cm<sup>-1</sup>): 2922, 2851, 1722, 1611, 1507, 1476, 1300, 1232, 1015, 756, 516.

**HRMS (ESI)** *m/z*: [M+H]<sup>+</sup> calcd for [C<sub>28</sub>H<sub>17</sub>F<sub>2</sub>O<sub>4</sub>]<sup>+</sup>: 455.1089, found: 455.1089.

**2,2'-Bis(4-chlorophenyl)-[2,2'-bibenzofuran]-3,3'(2*H*,2'*H*)-dione (2h).**

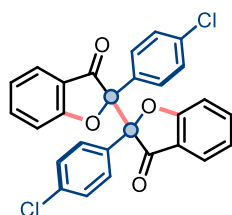

White solid, 12.5 mg, 52%. Eluent (Petroleum ether/ethyl acetate = 8:1).

***Cis*-2,2'-bis(4-chlorophenyl)-[2,2'-bibenzofuran]-3,3'(2*H*,2'*H*)-dione (2h-1).**

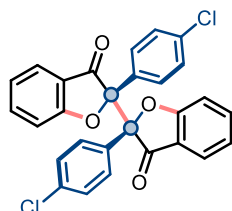

White solid, M.p. = 186 – 187 °C.

**<sup>1</sup>H NMR** (400 MHz, CDCl<sub>3</sub>) δ 7.63 (d, *J* = 7.7 Hz, 2H), 7.59 – 7.53 (m, 2H), 7.42 (d, *J* = 8.7 Hz, 4H), 7.24 (d, *J* = 8.8 Hz, 4H), 7.07 (t, *J* = 7.3 Hz, 2H), 7.00 (d, *J* = 8.4 Hz, 2H). **<sup>13</sup>C NMR** (101 MHz, CDCl<sub>3</sub>) δ 196.2, 171.1, 138.4, 135.5, 129.5, 129.4, 127.6, 125.0, 122.7, 121.1, 112.9, 89.3.

**IR** (KBr,  $\nu / \text{cm}^{-1}$ ): 2921, 2851, 1722, 1612, 1464, 1298, 1093, 1017, 901, 796, 753, 604, 469.

**HRMS (ESI)**  $m/z$ :  $[\text{M}+\text{H}]^+$  calcd for  $[\text{C}_{28}\text{H}_{17}\text{Cl}_2\text{O}_4]^+$ : 487.0498, found: 487.0500.

***Trans*-2,2'-bis(4-chlorophenyl)-[2,2'-bibenzofuran]-3,3'(2*H*,2'*H*)-dione (2h-2).**

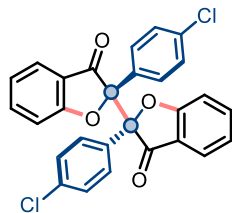

White solid, M.p. = 221– 222 °C.

**<sup>1</sup>H NMR** (400 MHz,  $\text{CDCl}_3$ )  $\delta$  7.61 – 7.56 (m, 4H), 7.47 (d,  $J = 8.7$  Hz, 4H), 7.24 (d,  $J = 8.7$  Hz, 4H), 7.11 (d,  $J = 8.7$  Hz, 2H), 7.05 (t,  $J = 7.4$  Hz, 2H). **<sup>13</sup>C NMR** (101 MHz,  $\text{CDCl}_3$ )  $\delta$  195.9, 170.8, 138.4, 135.5, 129.6, 129.4, 127.8, 124.9, 122.8, 121.4, 113.3, 90.0.

**IR** (KBr,  $\nu / \text{cm}^{-1}$ ): 2922, 2851, 1722, 1611, 1401, 1299, 1095, 1014, 753, 461.

**HRMS (ESI)**  $m/z$ :  $[\text{M}+\text{H}]^+$  calcd for  $[\text{C}_{28}\text{H}_{17}\text{Cl}_2\text{O}_4]^+$ : 487.0498, found: 487.0498.

**2,2'-Bis(4-bromophenyl)-[2,2'-bibenzofuran]-3,3'(2*H*,2'*H*)-dione (2i).**

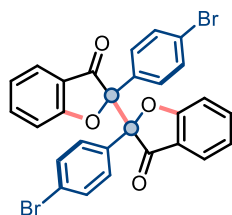

White solid, 17.5 mg, 61%. Eluent (Petroleum ether/ethyl acetate = 8:1).

***Cis*-2,2'-bis(4-bromophenyl)-[2,2'-bibenzofuran]-3,3'(2*H*,2'*H*)-dione (2i-1).**

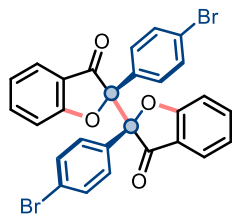

White solid, M.p. = 197– 198 °C.

**<sup>1</sup>H NMR** (600 MHz,  $\text{CDCl}_3$ )  $\delta$  7.62 (d,  $J = 7.6$  Hz, 2H), 7.56 (t,  $J = 7.7$  Hz, 2H), 7.40 (d,  $J = 8.5$  Hz, 4H), 7.35 (d,  $J = 8.6$  Hz, 4H), 7.07 (t,  $J = 7.4$  Hz, 2H), 7.00 (d,  $J = 8.4$  Hz, 2H). **<sup>13</sup>C NMR** (151 MHz,  $\text{CDCl}_3$ )  $\delta$  196.2, 171.1, 138.4, 130.6, 130.0, 129.8, 125.0, 124.0, 122.7, 121.1, 113.0, 89.3.

**IR** (KBr,  $\nu / \text{cm}^{-1}$ ): 2920, 2851, 1722, 1611, 1463, 1298, 1013, 901, 754, 514.

**HRMS (ESI)**  $m/z$ :  $[\text{M}+\text{H}]^+$  calcd for  $[\text{C}_{28}\text{H}_{17}\text{Br}_2\text{O}_4]^+$ : 576.9468, found: 576.9468.

***Trans*-2,2'-bis(4-bromophenyl)-[2,2'-bibenzofuran]-3,3'(2*H*,2'*H*)-dione (2i-2).**

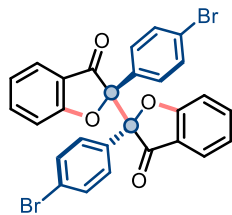

White solid, M.p. = 221– 222 °C.

**<sup>1</sup>H NMR** (600 MHz, CDCl<sub>3</sub>) δ 7.58 (d, *J* = 6.8 Hz, 4H), 7.39 (s, 8H), 7.11 (d, *J* = 8.6 Hz, 2H), 7.06 (t, *J* = 7.3 Hz, 2H). **<sup>13</sup>C NMR** (101 MHz, CDCl<sub>3</sub>) δ 195.7, 170.7, 138.3, 130.6, 130.0, 129.6, 124.8, 123.8, 122.7, 121.3, 113.2, 89.9.

**IR** (KBr,  $\nu$  / cm<sup>-1</sup>): 2921, 2851, 1722, 1610, 1463, 1325, 1010, 752, 515.

**HRMS (ESI)** *m/z*: [M+H]<sup>+</sup> calcd for [C<sub>28</sub>H<sub>17</sub>Br<sub>2</sub>O<sub>4</sub>]<sup>+</sup>: 576.9468, found: 576.9468.

**2,2'-Bis(4-(trifluoromethyl)phenyl)-[2,2'-bibenzofuran]-3,3'-(2H,2'H)-dione (2j).**

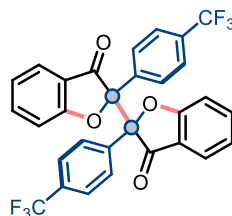

White solid, 14.9 mg, 55%. Eluent (Petroleum ether/ethyl acetate = 8:1).

***Cis*-2,2'-bis(4-(trifluoromethyl)phenyl)-[2,2'-bibenzofuran]-3,3'-(2H,2'H)-dione (2j-1).**

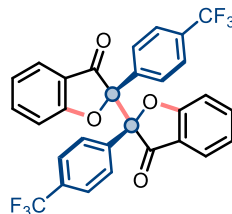

White solid. The melting point of this compound is above 300 °C, which cannot be measured by a micro melting point meter.

**<sup>1</sup>H NMR** (600 MHz, CDCl<sub>3</sub>) δ 7.68 – 7.57 (m, 8H), 7.53 (d, *J* = 8.0 Hz, 4H), 7.10 (t, *J* = 7.4 Hz, 2H), 7.05 (d, *J* = 8.5 Hz, 2H). **<sup>13</sup>C NMR** (151 MHz, CDCl<sub>3</sub>) δ 195.8, 171.2, 138.7, 134.8, 131.4 (q, *J* = 32.6 Hz), 128.5, 125.1, 124.4 (q, *J* = 3.8 Hz), 124.0 (q, *J* = 272.3 Hz), 122.9, 120.9, 113.0, 89.1.

**<sup>19</sup>F NMR** (565 MHz, CDCl<sub>3</sub>) δ -62.7.

**IR** (KBr,  $\nu$  / cm<sup>-1</sup>): 2923, 2851, 1724, 1612, 1463, 1326, 1117, 759, 420.

**HRMS (ESI)** *m/z*: [M+H]<sup>+</sup> calcd for [C<sub>30</sub>H<sub>17</sub>F<sub>6</sub>O<sub>4</sub>]<sup>+</sup>: 555.1026, found: 555.1026.

***Trans*-2,2'-bis(4-(trifluoromethyl)phenyl)-[2,2'-bibenzofuran]-3,3'-(2H,2'H)-dione (2j-2).**

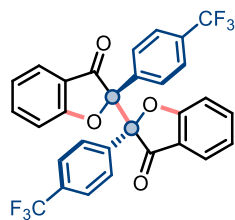

White solid, M.p. = 220– 222 °C.

$^1\text{H NMR}$  (600 MHz,  $\text{CDCl}_3$ )  $\delta$  7.67 (d,  $J$  = 8.2 Hz, 4H), 7.60 (ddd,  $J$  = 10.4, 7.2, 1.6 Hz, 4H), 7.53 (d,  $J$  = 8.3 Hz, 4H), 7.14 (d,  $J$  = 8.3 Hz, 2H), 7.08 (t,  $J$  = 7.4 Hz, 2H).

$^{13}\text{C NMR}$  (151 MHz,  $\text{CDCl}_3$ )  $\delta$  195.4, 170.8, 138.6, 134.9, 131.4 (q,  $J$  = 32.6 Hz), 128.5, 125.0, 124.5 (q,  $J$  = 3.7 Hz), 124.0 (q,  $J$  = 273.0, 272.2 Hz), 123.0, 121.3, 113.2, 89.9.

$^{19}\text{F NMR}$  (565 MHz,  $\text{CDCl}_3$ )  $\delta$  -62.8.

**IR** (KBr,  $\nu$  /  $\text{cm}^{-1}$ ): 2919, 2850, 1724, 1613, 1325, 1118, 1017, 758.

**HRMS (ESI)**  $m/z$ :  $[\text{M}+\text{H}]^+$  calcd for  $[\text{C}_{30}\text{H}_{17}\text{F}_6\text{O}_4]^+$ : 555.1026, found: 555.1026.

#### Dimethyl 4,4'-(3,3'-dioxo-[2,2'-bibenzofuran]-2,2'(3*H*,3'*H*)-diyl)dibenzoate (2k).

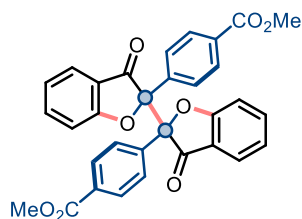

White solid, 9.9 mg, 37%. Eluent (Petroleum ether/ethyl acetate = 4:1).

M.p. = 269 – 270 °C.

$^1\text{H NMR}$  (400 MHz,  $\text{CDCl}_3$ )  $\delta$  7.90 (d,  $J$  = 8.7 Hz, 4H), 7.64 – 7.60 (m, 3H), 7.57 (dd,  $J$  = 7.9, 3.5 Hz, 5H), 7.15 (d,  $J$  = 8.2 Hz, 1H), 7.10 – 7.03 (m, 3H), 3.91 (s, 3H), 3.90 (s, 3H).  $^{13}\text{C NMR}$  (101 MHz,  $\text{CDCl}_3$ )  $\delta$  195.8, 195.5, 171.2, 170.9, 166.8, 166.8, 138.5, 138.5, 135.9, 135.8, 130.8, 130.8, 128.7, 128.6, 128.0, 125.0, 124.9, 122.8, 122.8, 121.4, 121.0, 113.3, 113.0, 90.2, 89.5, 52.4.

**IR** (KBr,  $\nu$  /  $\text{cm}^{-1}$ ): 2918, 2849, 1724, 1612, 1435, 1280, 1111, 1020, 765, 703.

**HRMS (ESI)**  $m/z$ :  $[\text{M}+\text{H}]^+$  calcd for  $[\text{C}_{32}\text{H}_{23}\text{O}_8]^+$ : 535.1387, found: 535.1387.

#### 2,2'-Bis(4-acetylphenyl)-[2,2'-bibenzofuran]-3,3'(2*H*,2'*H*)-dione (2l).

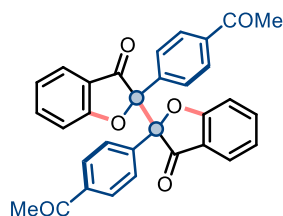

White solid, 15.3 mg, 61%. Eluent (Petroleum ether/ethyl acetate = 4:1).

The melting point of this compound is above 300 °C, which cannot be measured by a micro melting point meter.

**<sup>1</sup>H NMR** (400 MHz, CDCl<sub>3</sub>) δ 7.86 – 7.80 (m, 4H), 7.67 – 7.55 (m, 8H), 7.16 – 7.03 (m, 4H), 2.58 (d, *J* = 6.6 Hz, 6H). **<sup>13</sup>C NMR** (101 MHz, CDCl<sub>3</sub>) δ 197.9, 197.9, 195.8, 195.4, 171.2, 170.8, 138.5, 138.5, 137.5, 136.0, 135.8, 128.3, 127.5, 127.3, 125.1, 124.9, 122.9, 122.8, 121.3, 121.0, 113.3, 113.0, 90.3, 89.6, 29.8, 26.9.

**IR** (KBr, *v* / cm<sup>-1</sup>): 2918, 2850, 1722, 1686, 1608, 1425, 1198, 958, 736, 544, 468.

**HRMS (ESI)** *m/z*: [M+H]<sup>+</sup> calcd for [C<sub>32</sub>H<sub>23</sub>O<sub>6</sub>]<sup>+</sup>: 503.1489, found: 503.1488.

**5,5',7,7'-Tetramethyl-2,2'-diphenyl-[2,2'-bibenzofuran]-3,3'(2*H*,2'*H*)-dione (2m).**

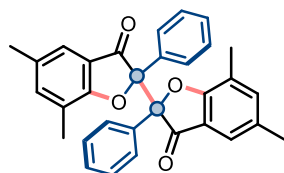

White solid, 12.6 mg, 53%. Eluent (Petroleum ether/ethyl acetate = 8:1).

***Cis*-5,5',7,7'-tetramethyl-2,2'-diphenyl-[2,2'-bibenzofuran]-3,3'(2*H*,2'*H*)-dione (2m-1).**

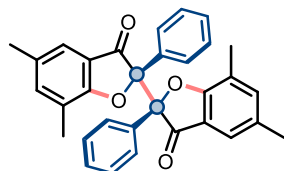

White solid, M.p. = 245 – 248 °C.

**<sup>1</sup>H NMR** (600 MHz, CDCl<sub>3</sub>) δ 7.51 (d, *J* = 7.9 Hz, 4H), 7.30 (t, *J* = 7.1 Hz, 2H), 7.23 (dd, *J* = 15.6, 8.3 Hz, 6H), 7.16 (s, 2H), 2.27 (s, 6H), 2.04 (s, 6H). **<sup>13</sup>C NMR** (101 MHz, CDCl<sub>3</sub>) δ 197.2, 168.6, 139.6, 131.6, 131.5, 128.8, 128.0, 127.2, 122.6, 121.3, 121.0, 90.3, 20.8, 13.9.

**IR** (KBr, *v* / cm<sup>-1</sup>): 2920, 2850, 1718, 1613, 1491, 1264, 1018, 747.

**HRMS (ESI)** *m/z*: [M+H]<sup>+</sup> calcd for [C<sub>32</sub>H<sub>27</sub>O<sub>4</sub>]<sup>+</sup>: 475.1904, found: 475.1903.

***Trans*-5,5',7,7'-tetramethyl-2,2'-diphenyl-[2,2'-bibenzofuran]-3,3'(2*H*,2'*H*)-dione (2m-2).**

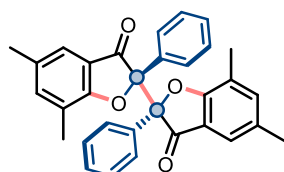

White solid, M.p. = 248 – 250 °C.

**<sup>1</sup>H NMR** (600 MHz, CDCl<sub>3</sub>) δ 7.6 (d, *J* = 7.5 Hz, 4H), 7.3 – 7.2 (m, 2H), 7.2 (t, *J* = 7.3 Hz, 4H), 7.1 (d, *J* = 12.9 Hz, 4H), 2.2 (s, 6H), 2.2 (s, 6H). **<sup>13</sup>C NMR** (151 MHz, CDCl<sub>3</sub>) δ 196.9, 168.2, 139.7, 131.9, 131.7, 128.8, 127.9, 127.3, 127.2, 122.7, 121.1, 90.7, 20.7, 14.2.

**IR** (KBr, *v* / cm<sup>-1</sup>): 2921, 2851, 1717, 1613, 1491, 1448, 1264, 1015, 746.

**HRMS (ESI)** *m/z*: [M+H]<sup>+</sup> calcd for [C<sub>32</sub>H<sub>27</sub>O<sub>4</sub>]<sup>+</sup>: 475.1904, found: 475.1904.

**2,2'-Bis(4-fluorophenyl)-6,6'-dimethyl-[2,2'-bibenzofuran]-3,3'(2*H*,2'*H*)-dione (2n).**

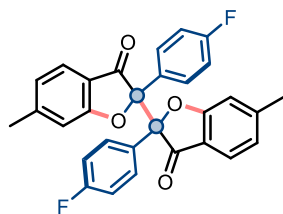

White solid, 9.4 mg, 39%. Eluent (Petroleum ether/ethyl acetate = 8:1).

**Cis-2,2'-bis(4-fluorophenyl)-6,6'-dimethyl-[2,2'-bibenzofuran]-3,3'(2H,2'H)-dione(2n-1).**

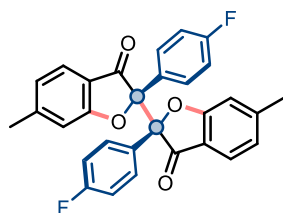

White solid. The melting point of this compound is above 300 °C, which cannot be measured by a micro melting point meter.

**<sup>1</sup>H NMR** (400 MHz, CDCl<sub>3</sub>) δ 7.50 – 7.44 (m, 6H), 6.93 (t, *J* = 8.8 Hz, 4H), 6.87 (d, *J* = 7.0 Hz, 4H), 2.39 (s, 6H). **<sup>13</sup>C NMR** (101 MHz, CDCl<sub>3</sub>) δ 196.0, 171.7, 163.3 (d, *J* = 248.5 Hz), 150.5, 129.9 (d, *J* = 8.5 Hz), 127.3 (d, *J* = 2.8 Hz), 124.5, 124.2, 118.8, 114.3 (d, *J* = 21.6 Hz), 113.1, 89.5, 22.7.

**<sup>19</sup>F NMR** (376 MHz, CDCl<sub>3</sub>) δ -112.8.

**IR** (KBr, *v* / cm<sup>-1</sup>): 2921, 2850, 1719, 1618, 1507, 1204, 1121, 1020, 809, 756, 525.

**HRMS (ESI)** *m/z*: [M+H]<sup>+</sup> calcd for [C<sub>30</sub>H<sub>21</sub>F<sub>2</sub>O<sub>4</sub>]<sup>+</sup>: 483.1402, found: 483.1402.

**Trans-2,2'-bis(4-fluorophenyl)-6,6'-dimethyl-[2,2'-bibenzofuran]-3,3'(2H,2'H)-dione(2n-2).**

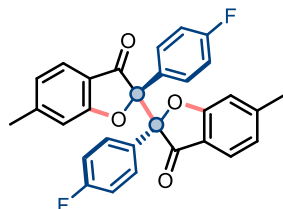

White solid, M.p. = 228 – 229 °C.

**<sup>1</sup>H NMR** (400 MHz, CDCl<sub>3</sub>) δ 7.52 – 7.47 (m, 4H), 7.45 (d, *J* = 7.9 Hz, 2H), 6.95 – 6.90 (m, 6H), 6.85 (d, *J* = 7.9 Hz, 2H), 2.39 (s, 6H). **<sup>13</sup>C NMR** (101 MHz, CDCl<sub>3</sub>) δ 195.5, 171.3, 163.3 (d, *J* = 248.6 Hz), 150.4, 130.0 (d, *J* = 8.3 Hz), 127.3 (d, *J* = 3.2 Hz), 124.4, 124.2, 119.2, 114.4 (d, *J* = 21.4 Hz), 113.3, 90.4, 22.7.

**<sup>19</sup>F NMR** (376 MHz, CDCl<sub>3</sub>) δ -112.7.

**IR** (KBr, *v* / cm<sup>-1</sup>): 2921, 2851, 1720, 1618, 1507, 1230, 1024, 812, 536.

**HRMS (ESI)** *m/z*: [M+H]<sup>+</sup> calcd for [C<sub>30</sub>H<sub>21</sub>F<sub>2</sub>O<sub>4</sub>]<sup>+</sup>: 483.1402, found: 483.1402.

**4,4'-(6,6'-Di-tert-butyl-3,3'-dioxo-[2,2'-bibenzofuran]-2,2'(3H,3'H)-diyl)dibenzonitrile (2o).**

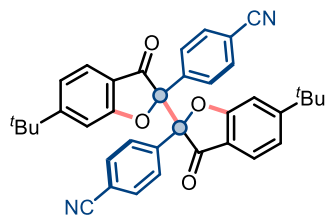

White solid, 13.7 mg, 47%. Eluent (Petroleum ether/ethyl acetate = 32:1).

The melting point of this compound is above 300 °C, which cannot be measured by a micro melting point meter.

**<sup>1</sup>H NMR** (400 MHz, CDCl<sub>3</sub>) δ 7.69 – 7.62 (m, 4H), 7.57 – 7.52 (m, 5H), 7.49 (d, *J* = 8.6 Hz, 1H), 7.18 – 7.12 (m, 3H), 7.05 (s, 1H), 1.32 (s, 9H), 1.30 (s, 9H). **<sup>13</sup>C NMR** (101 MHz, CDCl<sub>3</sub>) δ 194.8, 194.4, 171.9, 171.4, 164.5, 164.4, 136.4, 131.3, 131.2, 128.7, 128.6, 124.5, 124.3, 121.4, 121.3, 118.6, 118.5, 118.5, 118.2, 113.1, 113.1, 109.9, 109.5, 89.6, 88.8, 36.2, 36.2, 31.1.

**IR** (KBr, *v* / cm<sup>-1</sup>): 2963, 2923, 2858, 2230, 1722, 1617, 1426, 1022, 828, 553.

**HRMS (ESI)** *m/z*: [M+H]<sup>+</sup> calcd for [C<sub>38</sub>H<sub>33</sub>N<sub>2</sub>O<sub>4</sub>]<sup>+</sup>: 581.2435, found: 581.2435.

**6,6'-Di-*tert*-butyl-2,2'-bis(4-chlorophenyl)-[2,2'-bibenzofuran]-3,3'(2*H*,2'*H*)-dione (2p).**

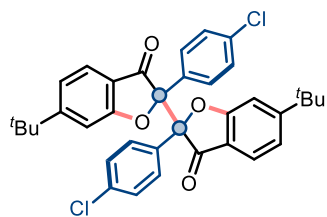

White solid, 25.8 mg, 86%. Eluent (Petroleum ether/ethyl acetate = 64:1).

***Cis*-6,6'-di-*tert*-butyl-2,2'-bis(4-chlorophenyl)-[2,2'-bibenzofuran]-3,3'(2*H*,2'*H*)-dione (2p-1).**

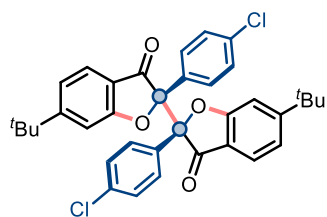

White solid, M.p. = 279 – 280 °C.

**<sup>1</sup>H NMR** (400 MHz, CDCl<sub>3</sub>) δ 7.53 (d, *J* = 8.2 Hz, 2H), 7.44 (d, *J* = 8.7 Hz, 4H), 7.23 (d, *J* = 8.7 Hz, 4H), 7.12 (dd, *J* = 8.2, 1.2 Hz, 2H), 7.00 (s, 2H), 1.29 (s, 18H). **<sup>13</sup>C NMR** (101 MHz, CDCl<sub>3</sub>) δ 195.7, 171.8, 163.6, 135.2, 129.9, 129.3, 127.4, 124.2, 120.6, 118.4, 109.4, 89.3, 36.0, 31.0.

**IR** (KBr, *v* / cm<sup>-1</sup>): 2957, 2921, 2851, 1722, 1619, 1427, 1017, 823, 730.

**HRMS (ESI)** *m/z*: [M+H]<sup>+</sup> calcd for [C<sub>36</sub>H<sub>33</sub>Cl<sub>2</sub>O<sub>4</sub>]<sup>+</sup>: 599.1750, found: 599.1749.

***Trans*-6,6'-di-*tert*-butyl-2,2'-bis(4-chlorophenyl)-[2,2'-bibenzofuran]-3,3'(2*H*,2'*H*)-dione (2p-2).**

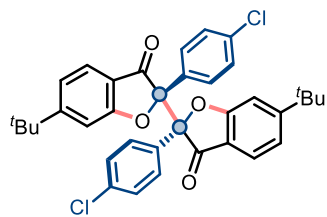

White solid, M.p. = 200 – 202 °C.

**<sup>1</sup>H NMR** (400 MHz, CDCl<sub>3</sub>) δ 7.48 (dd, *J* = 13.8, 8.7 Hz, 6H), 7.23 (d, *J* = 8.8 Hz, 4H), 7.12 – 7.09 (m, 4H), 1.30 (s, 18H). **<sup>13</sup>C NMR** (101 MHz, CDCl<sub>3</sub>) δ 195.8, 171.9, 163.7, 135.3, 130.0, 129.4, 127.6, 124.3, 120.8, 118.5, 109.5, 89.4, 36.1, 31.1.

**IR** (KBr, ν / cm<sup>-1</sup>): 2959, 2920, 2850, 1728, 1596, 1260, 1094, 1021, 800.

**HRMS (ESI)** m/z: [M+H]<sup>+</sup> calcd for [C<sub>36</sub>H<sub>33</sub>Cl<sub>2</sub>O<sub>4</sub>]<sup>+</sup>: 599.1750, found: 599.1749.

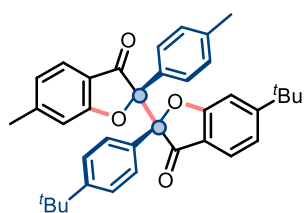

***Cis*-6-(*tert*-butyl)-2-(4-(*tert*-butyl)phenyl)-6'-methyl-2'-(*p*-tolyl)-[2,2'-bibenzofuran]-3,3'(2*H*,2'*H*)-dione (2s-1).**

White solid, 3.3 mg, 12%, Eluent (Petroleum ether/ethyl acetate = 8:1), M.p. = 91 – 92 °C.

**<sup>1</sup>H NMR** (400 MHz, CDCl<sub>3</sub>) δ 7.48 (t, *J* = 7.8 Hz, 2H), 7.44 – 7.39 (m, 2H), 7.35 (d, *J* = 8.3 Hz, 2H), 7.26 – 7.23 (m, 2H), 7.09 – 6.99 (m, 4H), 6.83 (d, *J* = 7.4 Hz, 2H), 2.37 (s, 3H), 2.32 (s, 3H), 1.28 (s, 18H). **<sup>13</sup>C NMR** (101 MHz, CDCl<sub>3</sub>) δ 196.3, 196.3, 171.8, 171.7, 162.9, 151.6, 149.7, 138.4, 128.6, 128.6, 127.8, 127.8, 127.7, 124.3, 124.0, 124.0, 123.5, 120.1, 119.0, 118.8, 112.9, 109.4, 90.2, 90.2, 35.9, 34.5, 31.3, 31.0, 22.5, 21.2.

**IR** (KBr, ν / cm<sup>-1</sup>): 2962, 1721, 1618, 1597, 1428, 1327, 1267, 1199, 1121, 934, 812, 795, 489.

**HRMS (ESI)** m/z: [M+H]<sup>+</sup> calcd for [C<sub>38</sub>H<sub>39</sub>O<sub>4</sub>]<sup>+</sup>: 559.2843, found: 559.2843.

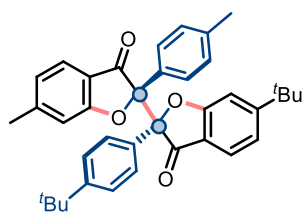

***Trans*-6-(*tert*-butyl)-2-(4-(*tert*-butyl)phenyl)-6'-methyl-2'-(*p*-tolyl)-[2,2'-bibenzofuran]-3,3'(2*H*,2'*H*)-dione (2s-2).**

White solid, 3.5 mg, 13%, Eluent (Petroleum ether/ethyl acetate = 8:1), M.p. = 67 – 68 °C.

**<sup>1</sup>H NMR** (400 MHz, CDCl<sub>3</sub>) δ 7.48 – 7.41 (m, 4H), 7.38 (d, *J* = 8.0 Hz, 2H), 7.25 (d, *J* = 8.0 Hz, 1H), 7.10 (s, 1H), 7.04 (d, *J* = 8.0 Hz, 3H), 6.92 (s, 1H), 6.82 (d, *J* = 7.9 Hz, 1H), 2.37 (s, 3H), 2.30 (s, 3H), 1.29 (s, 9H), 1.27 (s, 9H). **<sup>13</sup>C NMR** (101 MHz, CDCl<sub>3</sub>) δ 195.8, 195.7, 171.4, 171.2, 162.8, 151.6, 149.6, 138.5, 128.7, 128.5, 127.9, 127.8, 127.7, 124.2, 124.1, 123.9, 123.6, 120.2, 119.4, 119.0, 113.2, 109.7, 91.3, 91.1, 35.9, 34.5, 31.2, 31.0, 22.5, 21.2.

**IR** (KBr, ν / cm<sup>-1</sup>): 2961, 2925, 1724, 1618, 1428, 1327, 1276, 1199, 934, 751, 489.

**HRMS (ESI)** m/z: [M+H]<sup>+</sup> calcd for [C<sub>38</sub>H<sub>39</sub>O<sub>4</sub>]<sup>+</sup>: 559.2843, found: 559.2844.



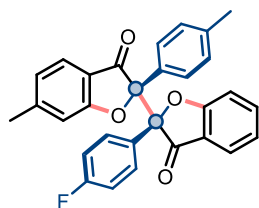

**Cis-2'-(4-fluorophenyl)-6-methyl-2-(p-tolyl)-[2,2'-bibenzofuran]-3,3'(2H,2'H)-dione (2t-1).**

White solid, 3.0 mg, 13%, Eluent (Petroleum ether/ethyl acetate = 8:1), M.p. = 74 – 75 °C.

<sup>1</sup>H NMR (400 MHz, CDCl<sub>3</sub>) δ 7.65 – 7.60 (m, 1H), 7.58 – 7.53 (m, 1H), 7.50 – 7.45 (m, 3H), 7.34 (d, *J* = 8.4 Hz, 2H), 7.08 – 7.02 (m, 4H), 6.95 – 6.90 (m, 2H), 6.86 – 6.79 (m, 2H), 2.36 (s, 3H), 2.32 (s, 3H). <sup>13</sup>C NMR (101 MHz, CDCl<sub>3</sub>) δ 196.6, 196.0, 171.5, 171.1, 163.2 (d, *J* = 247.9 Hz), 150.0, 138.8, 138.0, 129.9 (d, *J* = 8.2 Hz), 128.1, 127.9, 127.8, 127.0 (d, *J* = 3.0 Hz), 124.8, 124.3, 123.8, 122.2, 121.1, 118.8, 114.0 (d, *J* = 21.4 Hz), 112.8, 90.0, 89.6, 22.5, 21.2. <sup>19</sup>F NMR (376 MHz, CDCl<sub>3</sub>) δ -113.0 – -113.2 (m).

IR (KBr, ν / cm<sup>-1</sup>): 2924, 1721, 1616, 1508, 1463, 1326, 1299, 1231, 1163, 756, 512.

HRMS (ESI) m/z: [M+H]<sup>+</sup> calcd for [C<sub>30</sub>H<sub>22</sub>FO<sub>4</sub>]<sup>+</sup>: 465.1497, found: 465.1500.

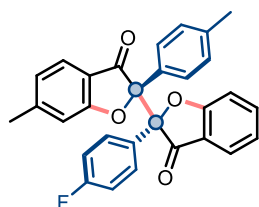

**Trans-2'-(4-fluorophenyl)-6-methyl-2-(p-tolyl)-[2,2'-bibenzofuran]-3,3'(2H,2'H)-dione (2t-2).**

White solid, 3.7 mg, 16%, Eluent (Petroleum ether/ethyl acetate = 8:1), M.p. = 174 – 175 °C.

<sup>1</sup>H NMR (400 MHz, CDCl<sub>3</sub>) δ 7.60 – 7.55 (m, 2H), 7.52 (dd, *J* = 9.0, 5.4 Hz, 2H), 7.44 (d, *J* = 7.9 Hz, 1H), 7.38 (d, *J* = 8.4 Hz, 2H), 7.11 (d, *J* = 8.3 Hz, 1H), 7.07 – 7.01 (m, 3H), 6.97 – 6.90 (m, 3H), 6.83 (d, *J* = 8.0 Hz, 1H), 2.38 (s, 3H), 2.30 (s, 3H). <sup>13</sup>C NMR (101 MHz, CDCl<sub>3</sub>) δ 196.2, 195.5, 171.2, 170.7, 163.1 (d, *J* = 248.3 Hz), 150.0, 138.8, 137.9, 129.9 (d, *J* = 8.4 Hz), 128.2, 128.1, 127.8, 127.1 (d, *J* = 3.2 Hz), 124.6, 124.2, 123.9, 122.3, 121.5, 119.2, 114.2 (d, *J* = 21.5 Hz), 113.2, 113.1, 90.9, 90.3, 22.5, 21.1. <sup>19</sup>F NMR (376 MHz, CDCl<sub>3</sub>) δ -112.9 – -113.0 (m).

IR (KBr, ν / cm<sup>-1</sup>): 2924, 1722, 1615, 1507, 1463, 1326, 1299, 1230, 796, 755, 511.

HRMS (ESI) m/z: [M+H]<sup>+</sup> calcd for [C<sub>30</sub>H<sub>22</sub>FO<sub>4</sub>]<sup>+</sup>: 465.1497, found: 465.1499.

## X. References

- 1 K. Park, G. Bae, J. Moon, J. Choe, K. H. Song and S. Lee, *J. Org. Chem.*, 2010, **75**, 6244-6251.
- 2 E. Voisin and V. E. Williams, *RSC advances*, 2016, **6**, 11262-11265.
- 3 B. Schmidt, S. Krehl and S. Hauke, *J. Org. Chem.*, 2013, **78**, 5427-5435.
- 4 X. Zeng, C. Miao, S. Wang, C. Xia and W. Sun, *RSC Adv.*, 2013, **3**, 9666-9669.
- 5 J. Zhou, X.-Z. Tao, J.-J. Dai, C.-G. Li, J. Xu, H.-M. Xu and H.-J. Xu, *Chem. Commun.*, 2019, **55**, 9208-9211.
- 6 T. Song, X. Zhou, X. Wang, J. Xiao and Y. Yang, *Green Chem.*, 2021, **23**, 1955-1959.
- 7 X. Zhu, P. Li, Q. Shi and L. Wang, *Green Chem.*, 2016, **18**, 6373-6379.
- 8 V. P. Charpe, A. Sagadevan and K. C. Hwang, *Green Chem.*, 2020, **22**, 4426-4432.
- 9 A. Gao, F. Yang, J. Li and Y. Wu, *Tetrahedron*, 2012, **68**, 4950-4954.

- 10 J. Hanuza, W. Sasiadek, E. Kucharska, J. Michalski, M. Maczka, A. Kaminski, A. Koronienko, E. Dunina, H. Klapper and J. Hulliger, *J. Raman Spectrosc.*, 2004, **35**, 224-235.
- 11 T. Dai, X. Zhang, M. Sun, B. Huang, N. Zhang, P. Da, R. Yang, Z. He, W. Wang and P. Xi, *Adv. Mater.*, 2021, **33**, 2102593.
- 12 T. Hasegawa, M. Imada, Y. Imase, Y. Yamazaki and M. Yoshioka, *J. Chem. Soc., Perkin Trans. 1.*, 1997, 1271-1274

## XI. NMR Spectra

$^1\text{H}$  NMR (600 MHz,  $\text{CDCl}_3$ ) spectra of compound **1c**

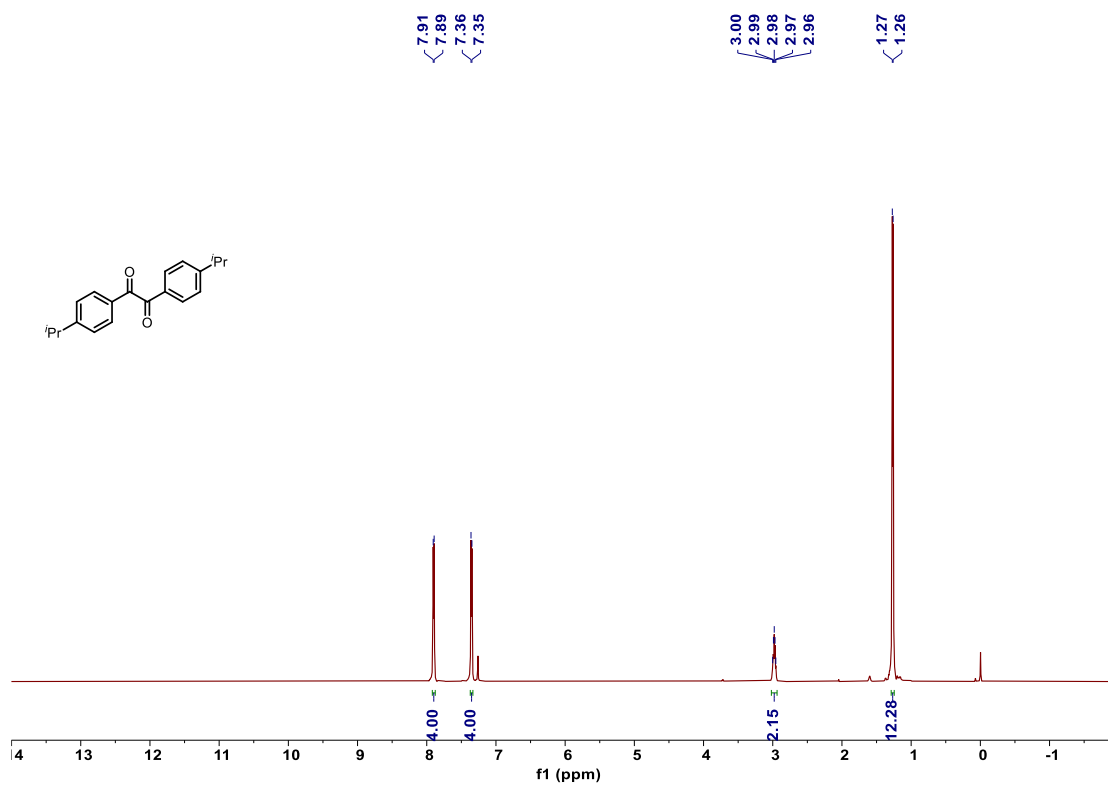

$^{13}\text{C}$  NMR (101 MHz,  $\text{CDCl}_3$ ) spectra of compound **1c**

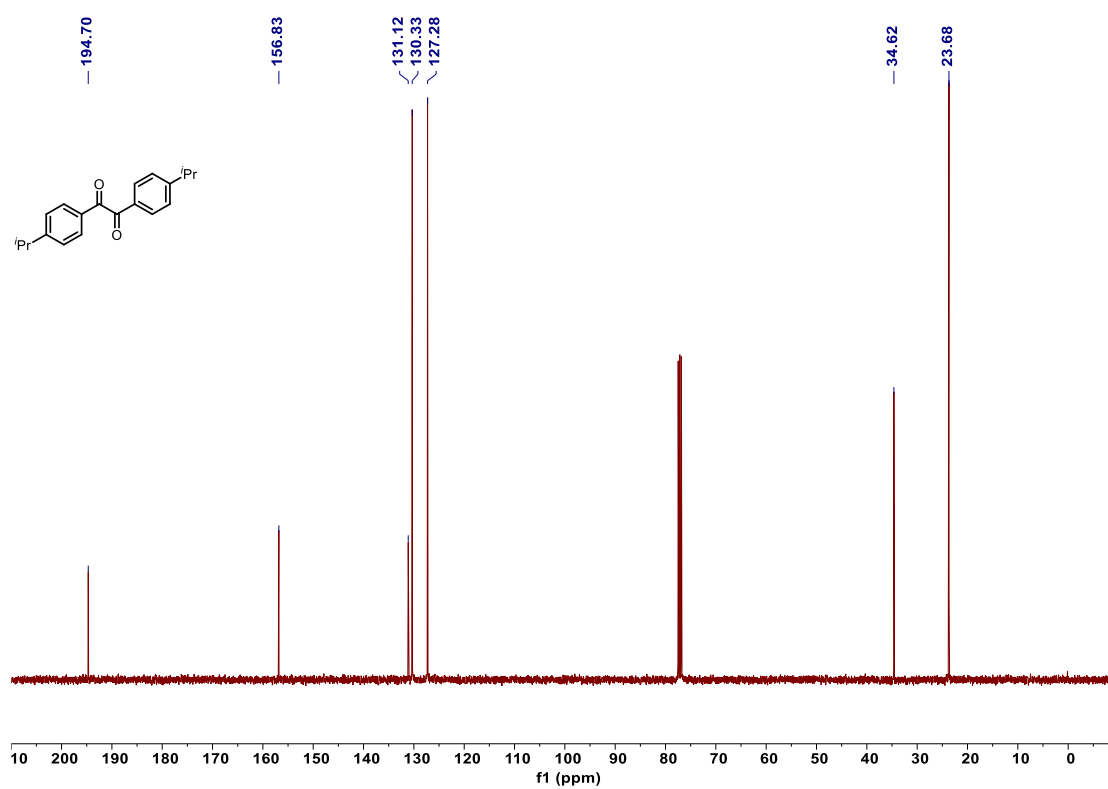

$^1\text{H}$  NMR (600 MHz,  $\text{CDCl}_3$ ) spectra of compound **1e**

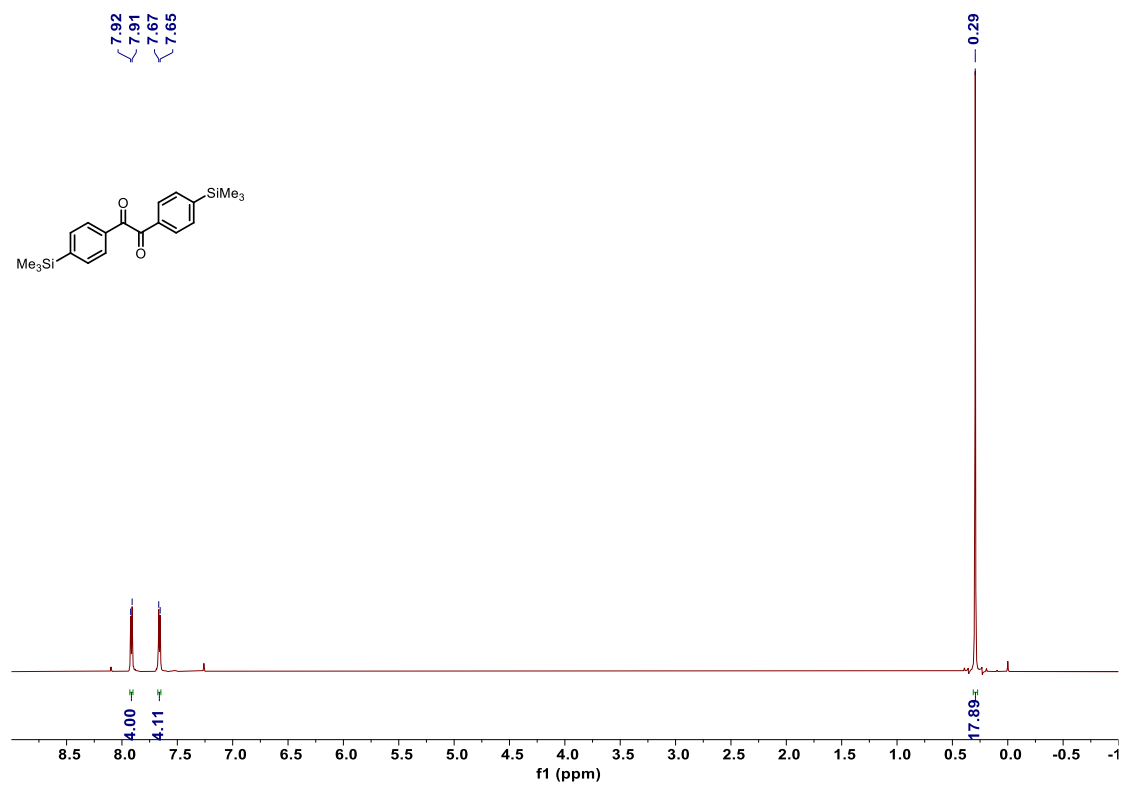

$^{13}\text{C}$  NMR (101 MHz,  $\text{CDCl}_3$ ) spectra of compound **1e**

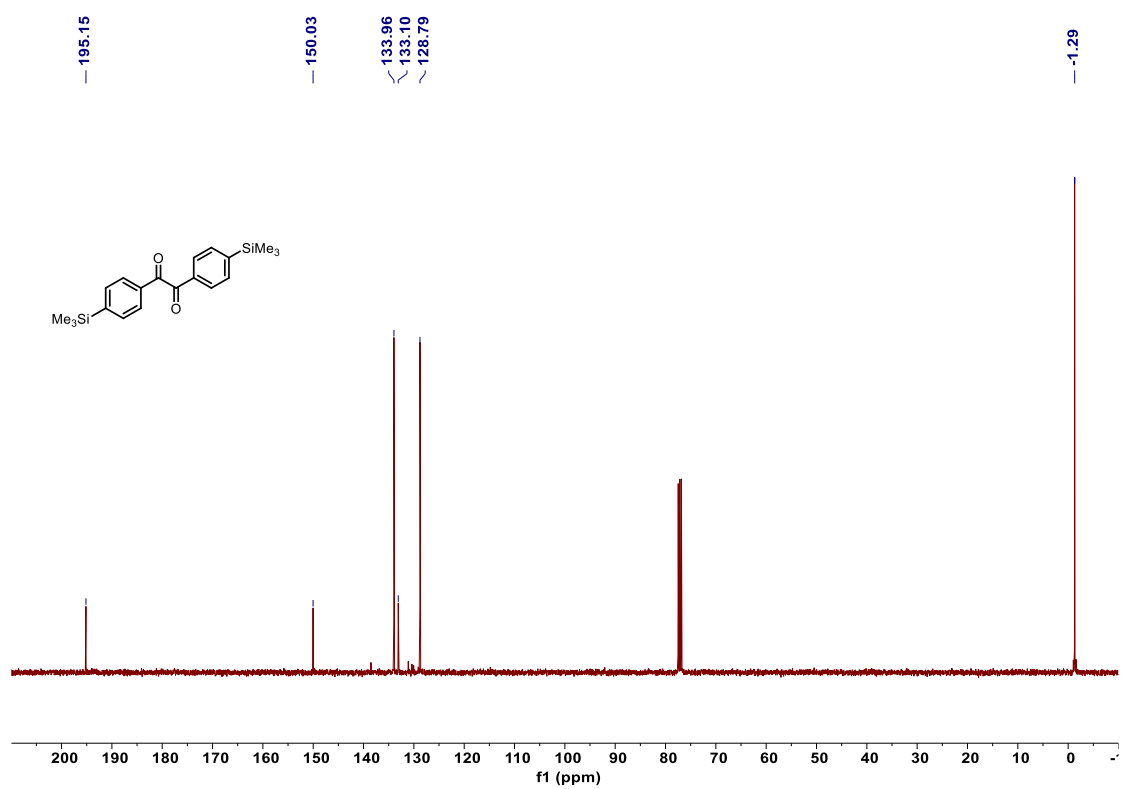

$^1\text{H}$  NMR (400 MHz,  $\text{CDCl}_3$ ) spectra of compound **1f**

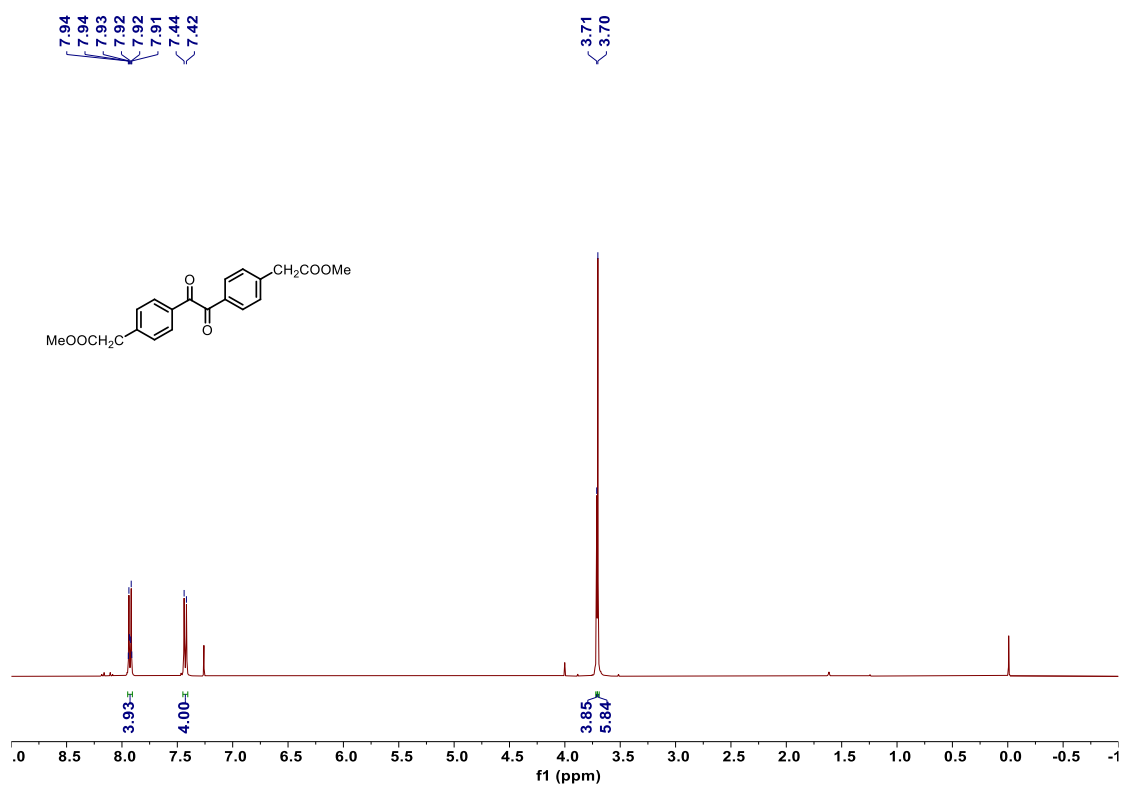

$^{13}\text{C}$  NMR (101 MHz,  $\text{CDCl}_3$ ) spectra of compound **1f**

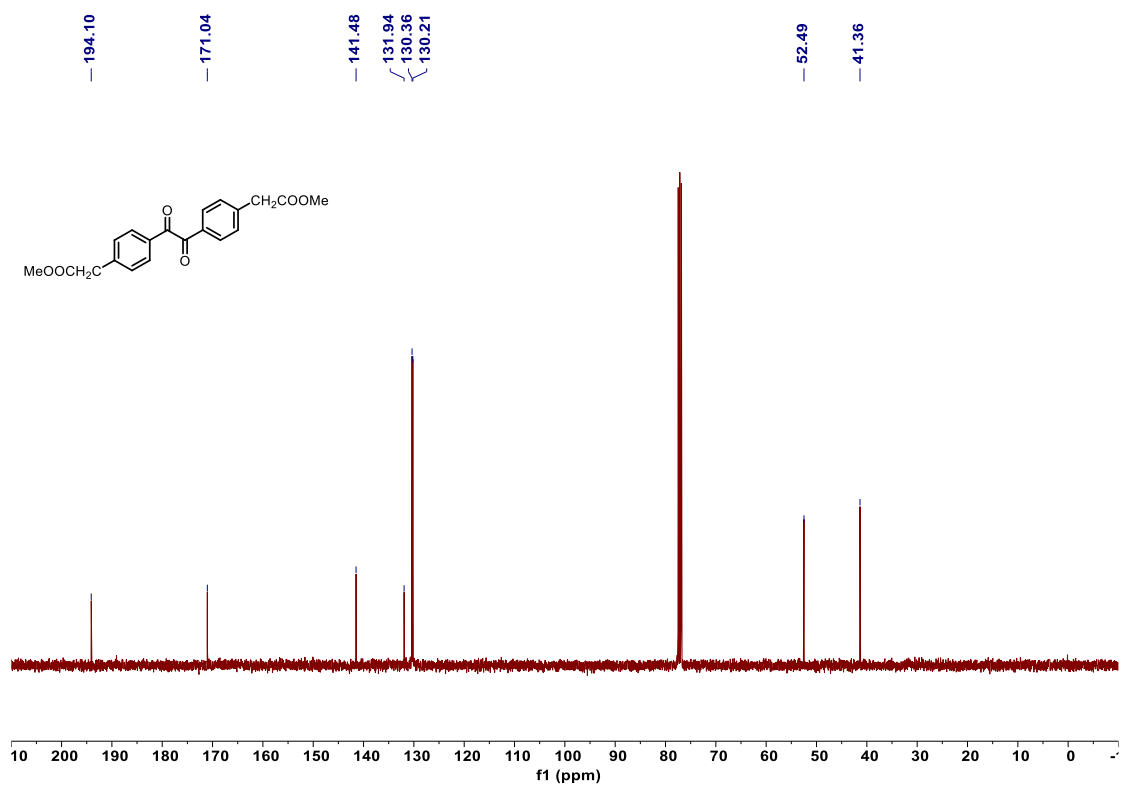

$^1\text{H}$  NMR (600 MHz,  $\text{CDCl}_3$ ) spectra of compound **1g**

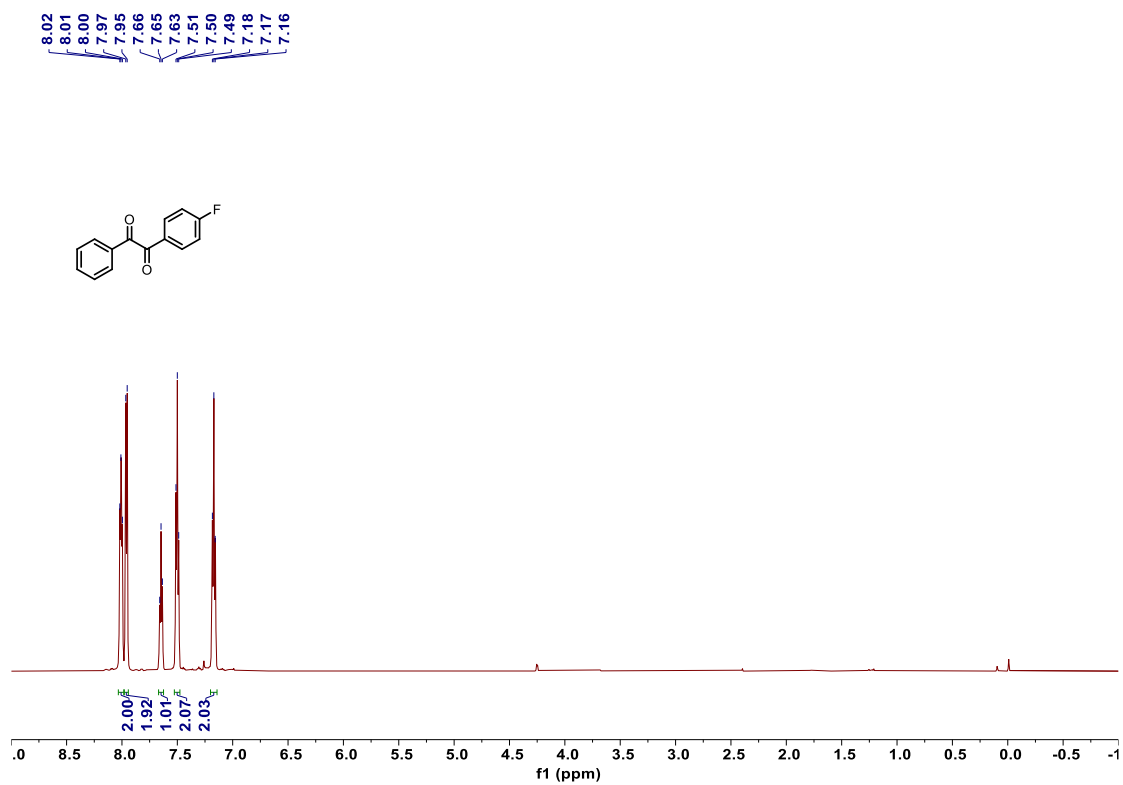

$^{13}\text{C}$  NMR (101 MHz,  $\text{CDCl}_3$ ) spectra of compound **1g**

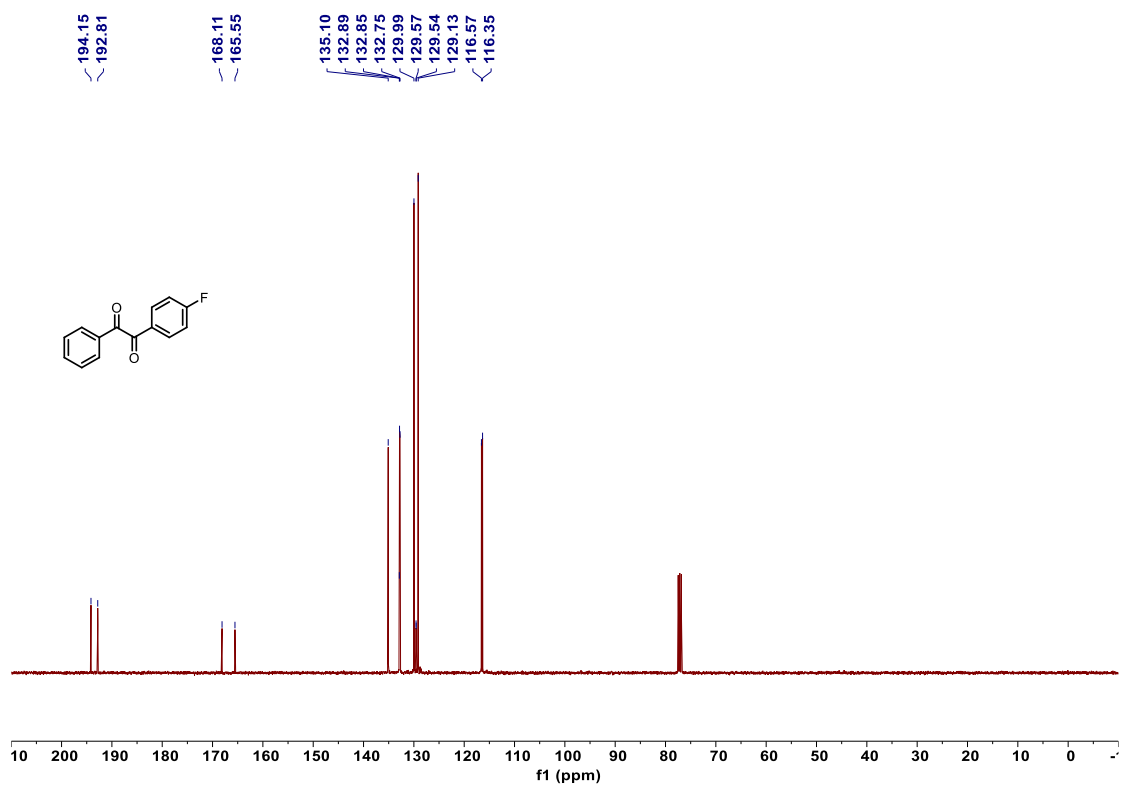

$^{19}\text{F}$  NMR (565MHz,  $\text{CDCl}_3$ ) spectra of compound **1g**

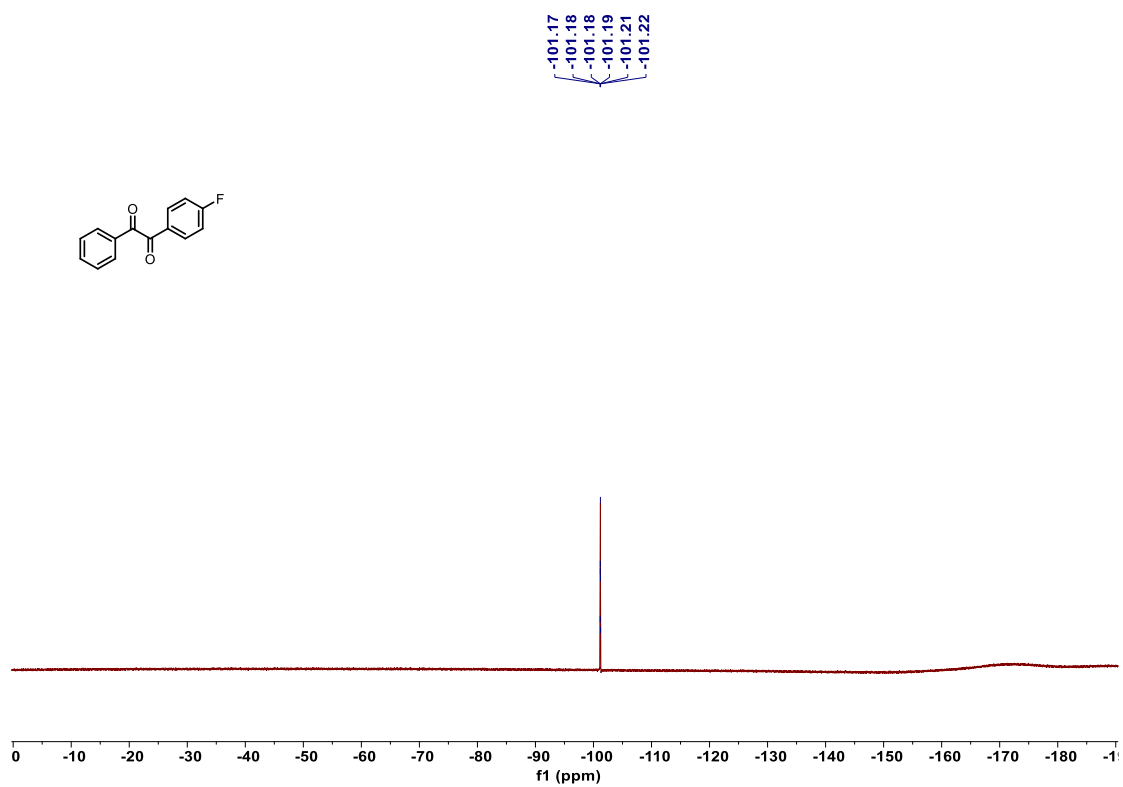

$^1\text{H}$  NMR (600 MHz,  $\text{CDCl}_3$ ) spectra of compound **1h**

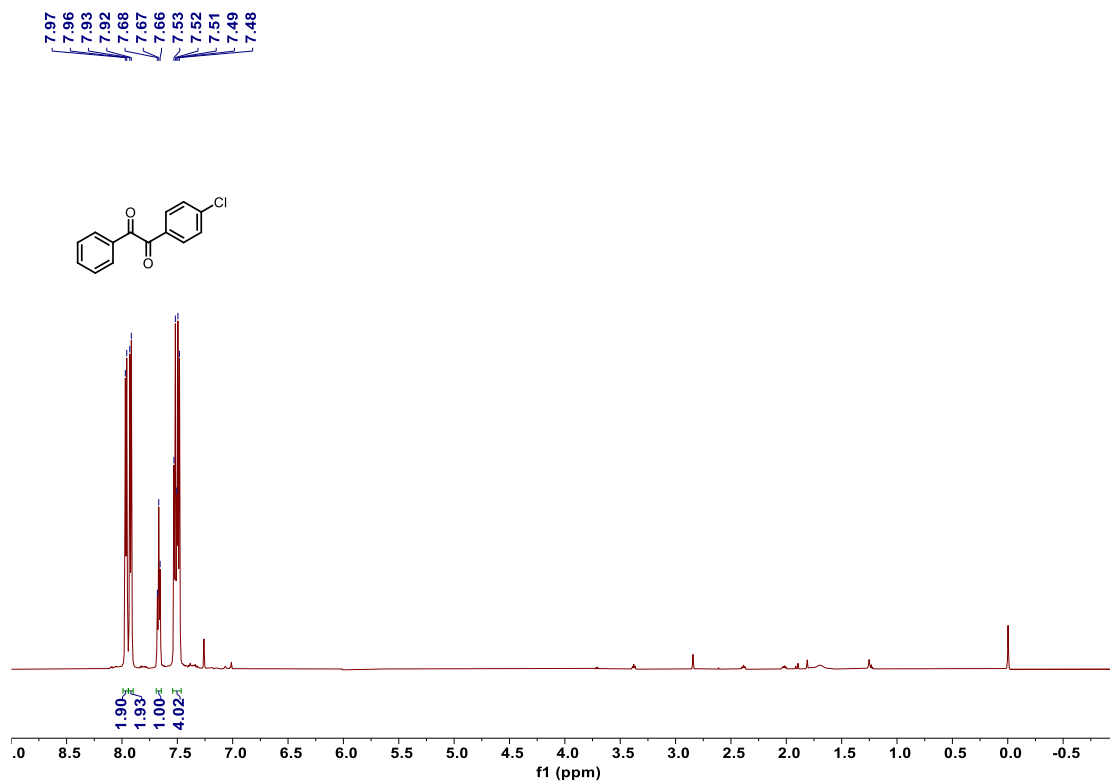

$^{13}\text{C}$  NMR (151 MHz,  $\text{CDCl}_3$ ) spectra of compound **1h**

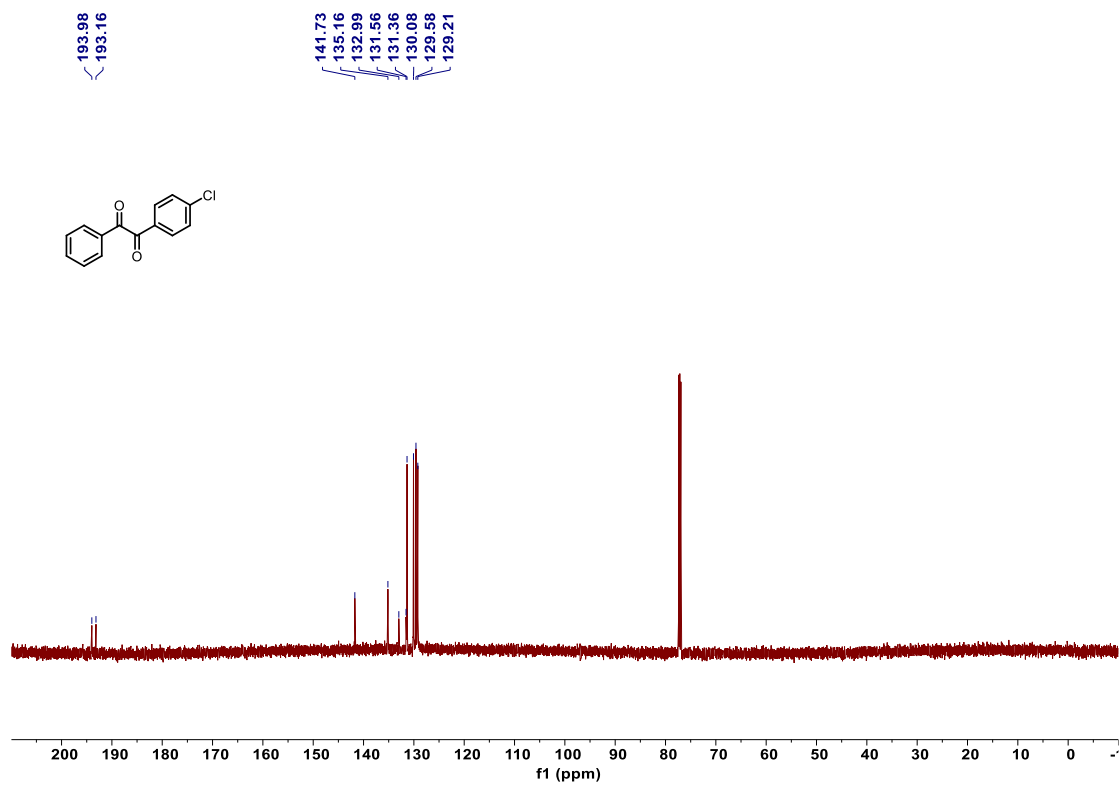

$^1\text{H}$  NMR (400 MHz,  $\text{CDCl}_3$ ) spectra of compound **1i**

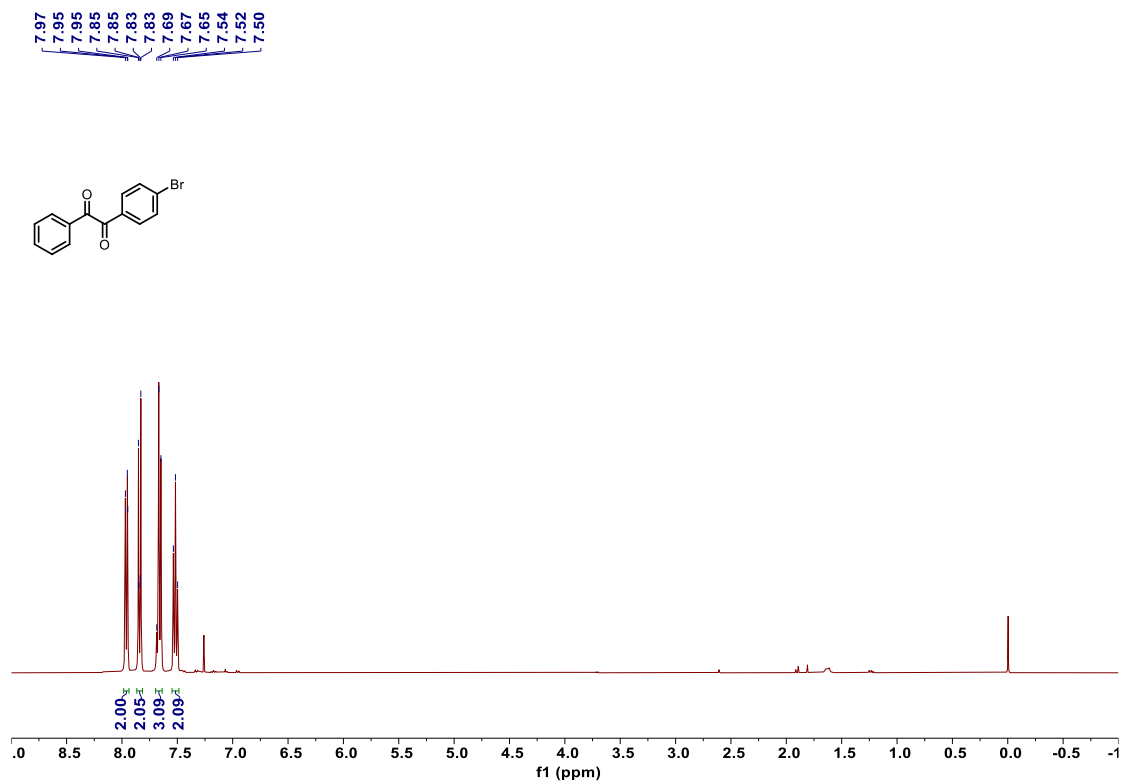



$^{13}\text{C}$  NMR (101 MHz,  $\text{CDCl}_3$ ) spectra of compound **1i**

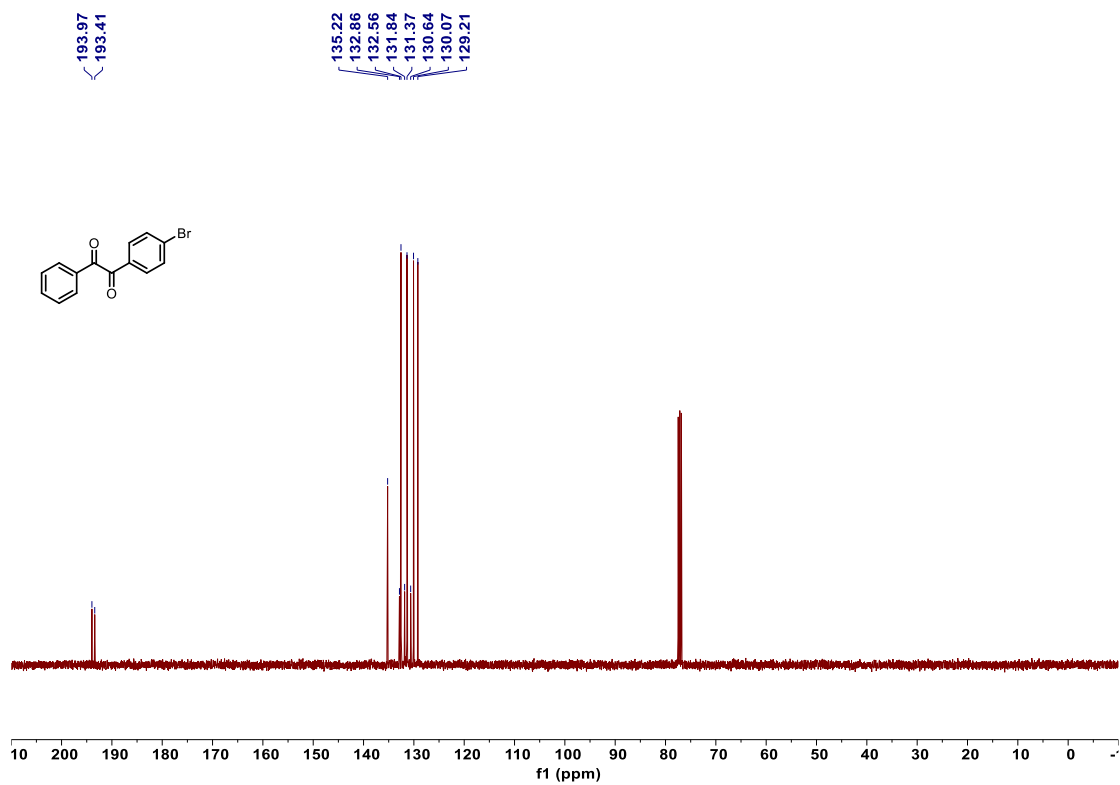

$^1\text{H}$  NMR (400 MHz,  $\text{CDCl}_3$ ) spectra of compound **1j**

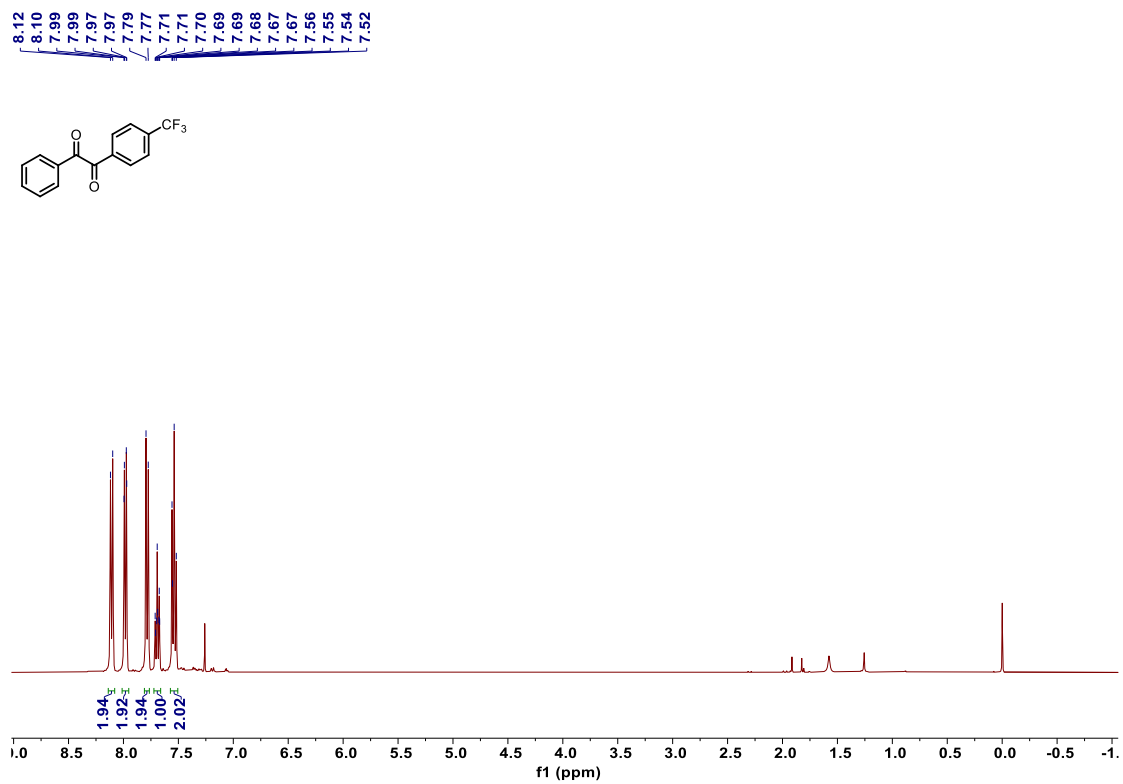

$^{13}\text{C}$  NMR (101 MHz,  $\text{CDCl}_3$ ) spectra of compound **1j**

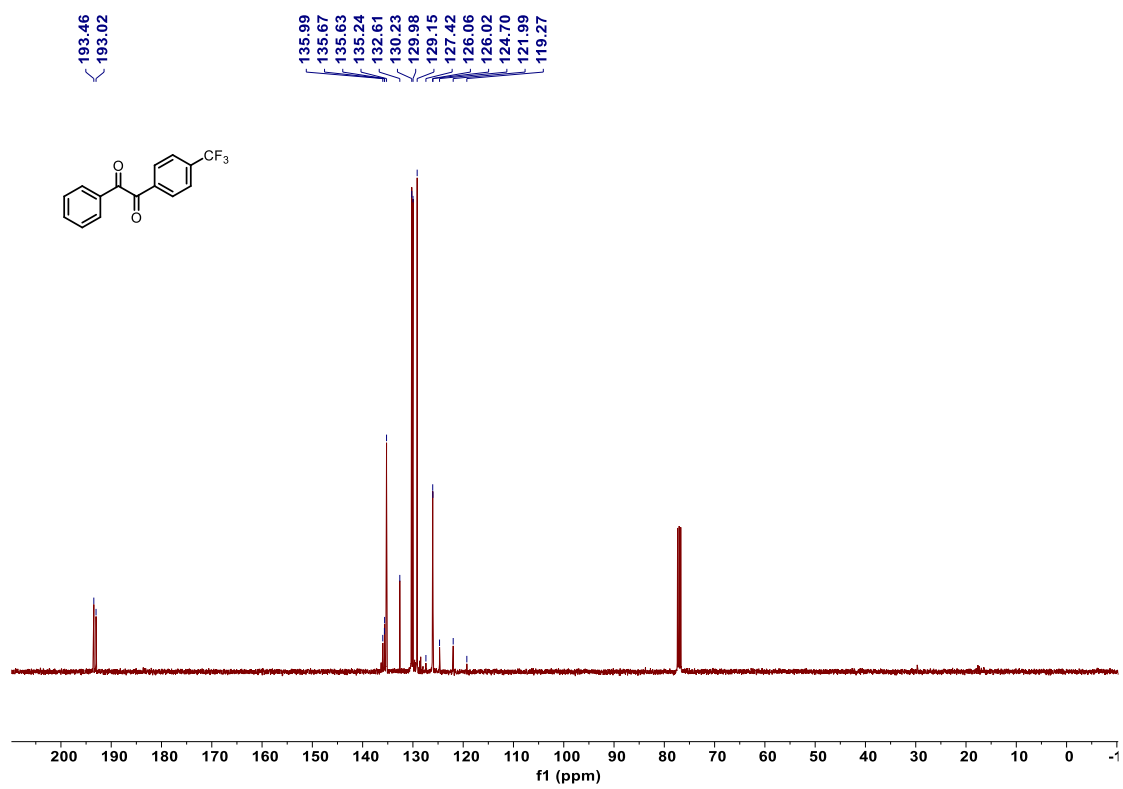

$^{19}\text{F}$  NMR (565 MHz,  $\text{CDCl}_3$ ) spectra of compound **1j**

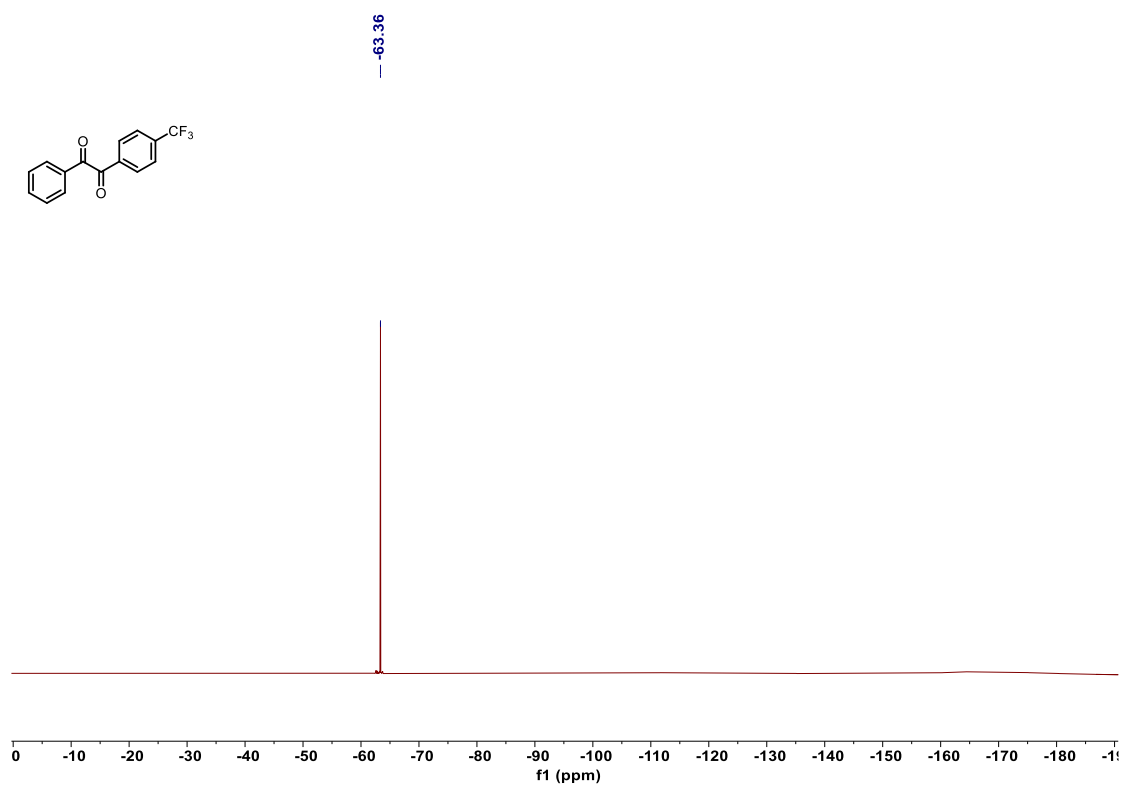

$^1\text{H}$  NMR (400 MHz,  $\text{CDCl}_3$ ) spectra of compound **1k**

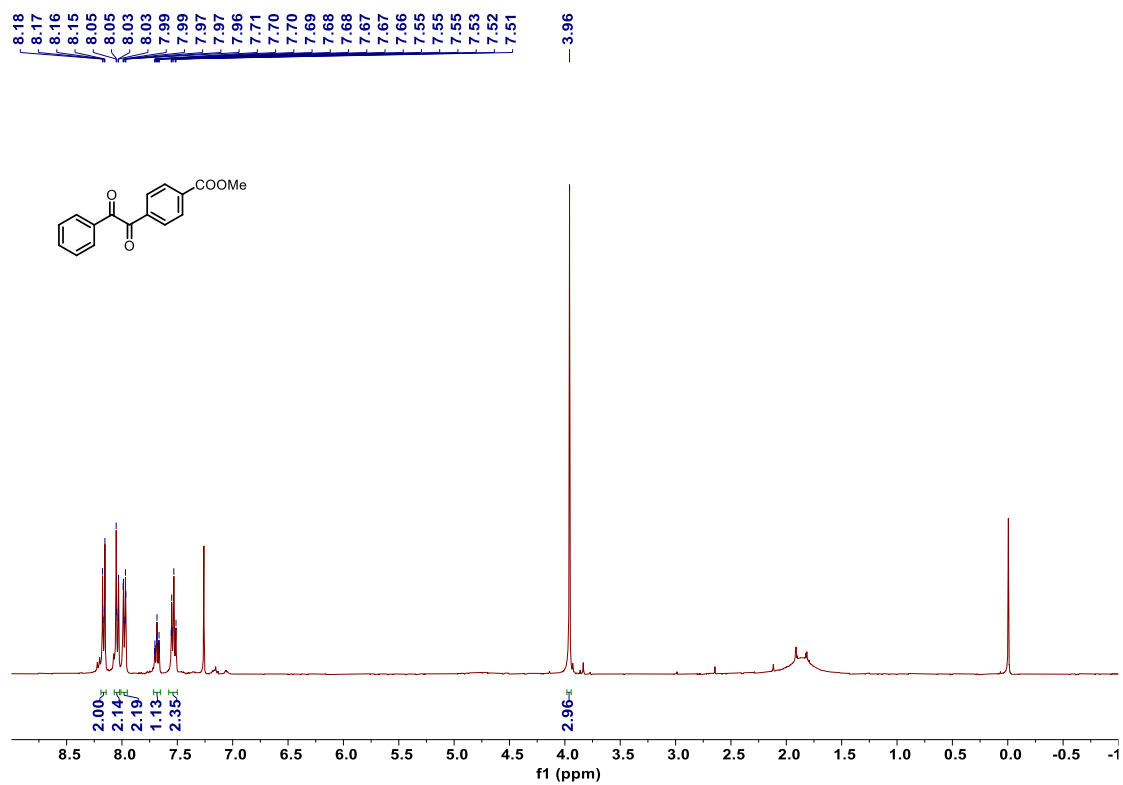

$^{13}\text{C}$  NMR (101 MHz,  $\text{CDCl}_3$ ) spectra of compound **1k**

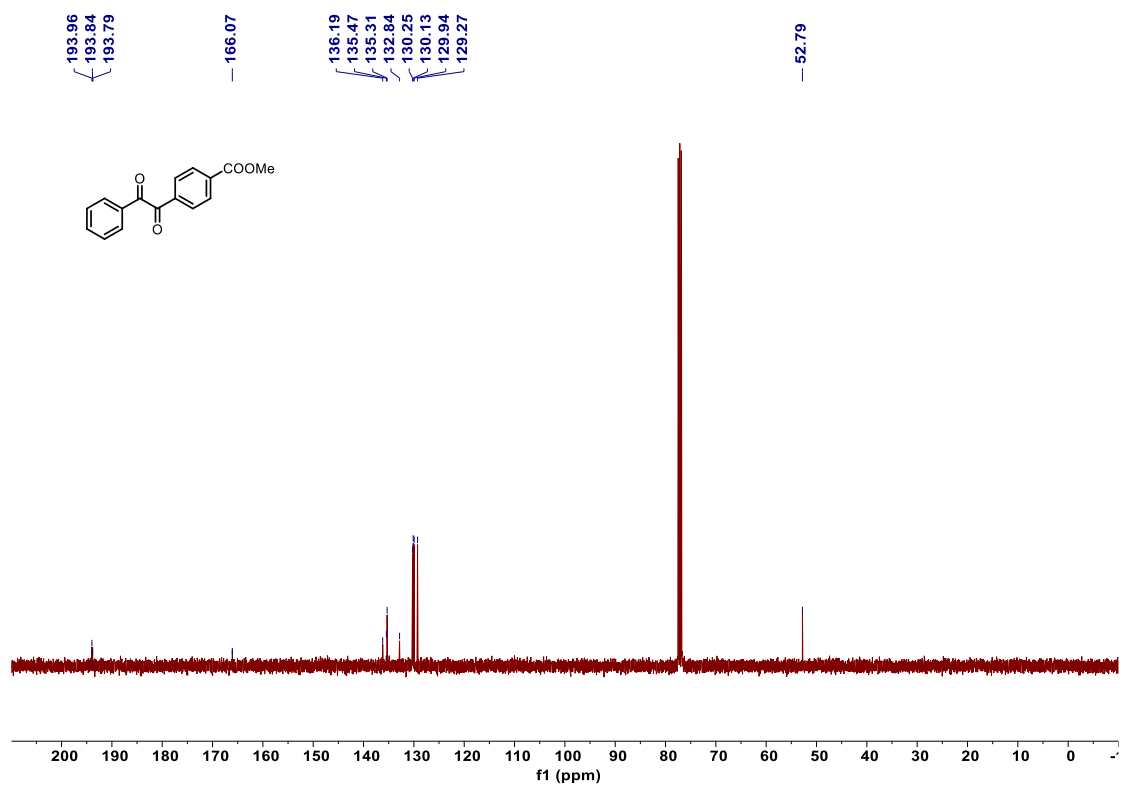

$^1\text{H}$  NMR (400 MHz,  $\text{CDCl}_3$ ) spectra of compound **11**

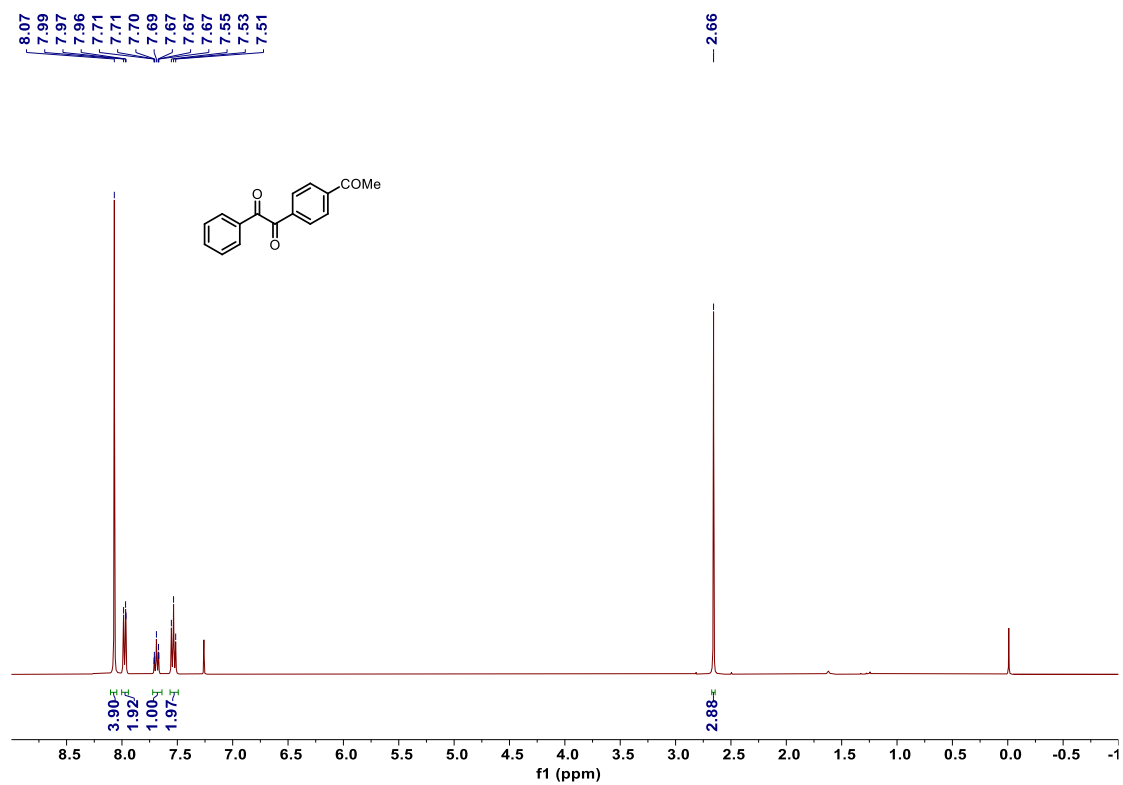

$^{13}\text{C}$  NMR (101 MHz,  $\text{CDCl}_3$ ) spectra of compound **11**

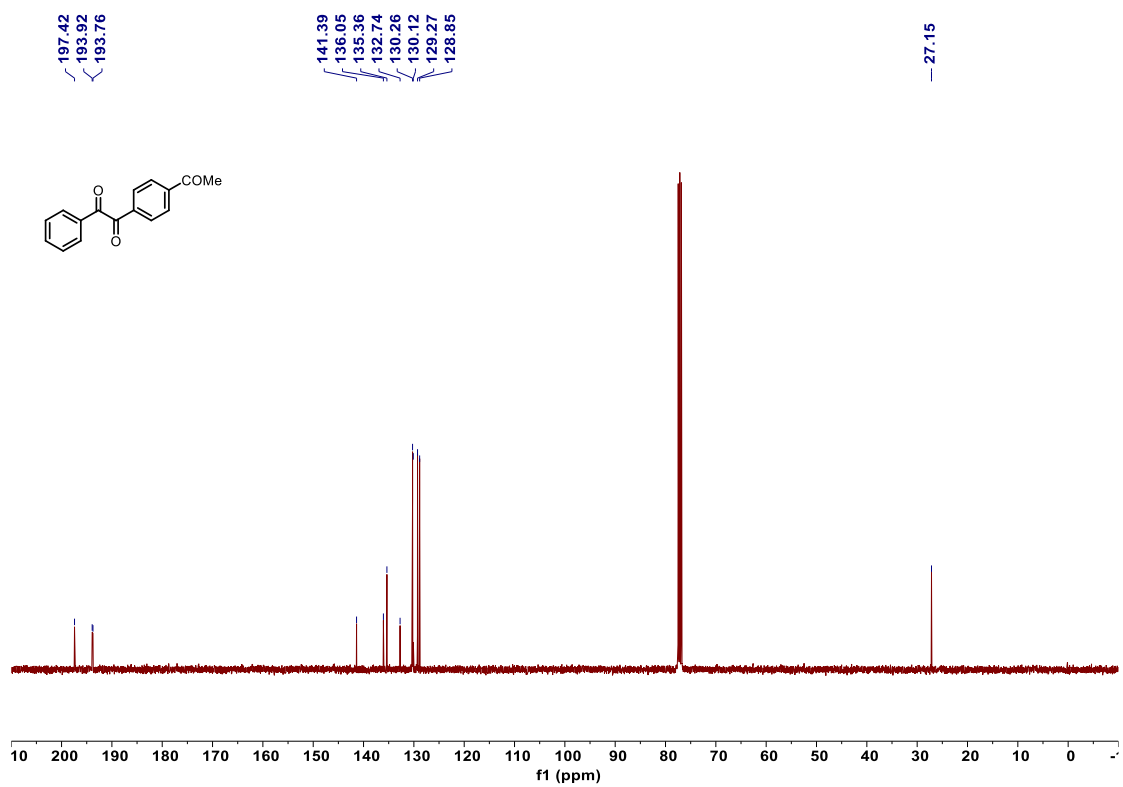

$^1\text{H}$  NMR (600 MHz,  $\text{CDCl}_3$ ) spectra of compound **1m**

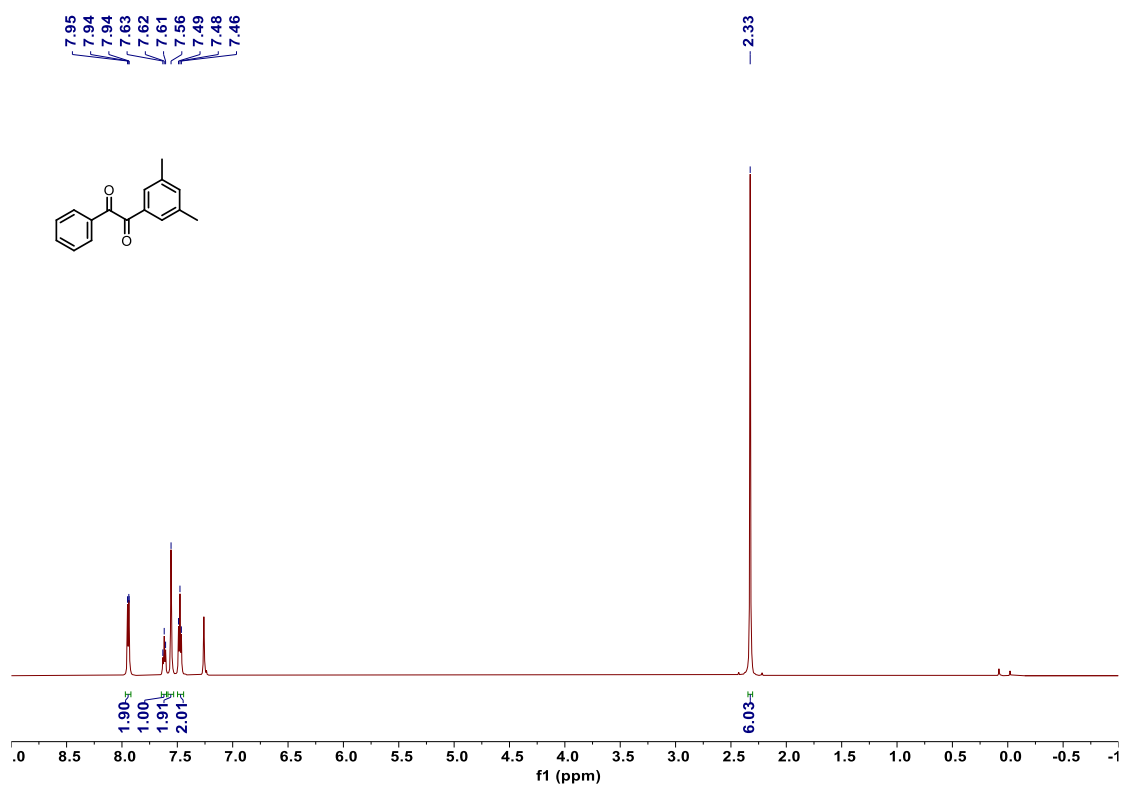

$^{13}\text{C}$  NMR (151 MHz,  $\text{CDCl}_3$ ) spectra of compound **1m**

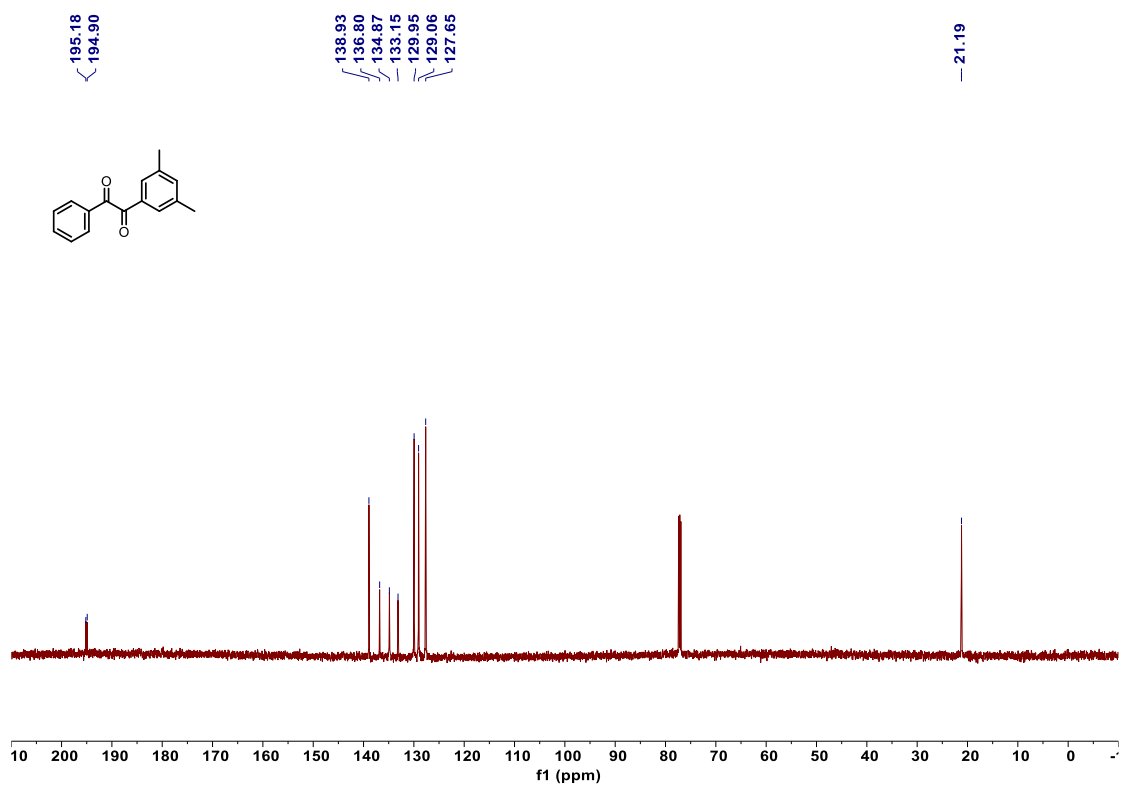

<sup>1</sup>H NMR (400 MHz, CDCl<sub>3</sub>) spectra of compound **1n**

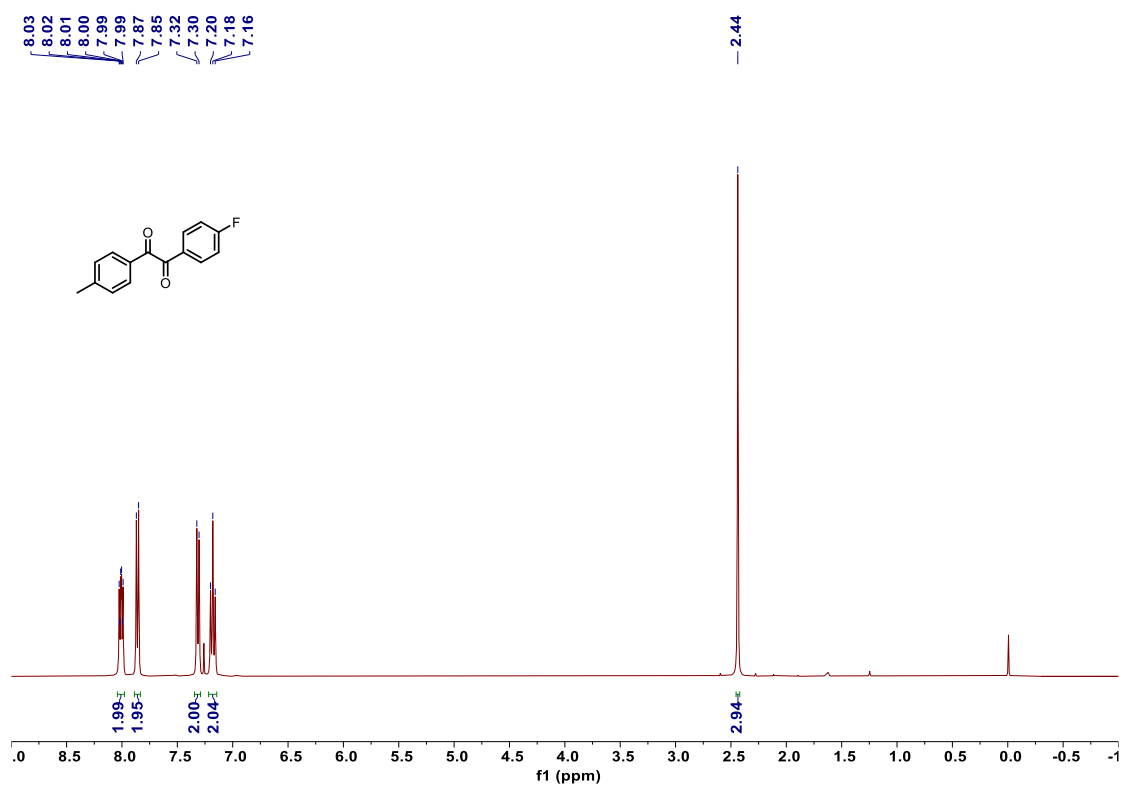

<sup>13</sup>C NMR (101 MHz, CDCl<sub>3</sub>) spectra of compound **1n**

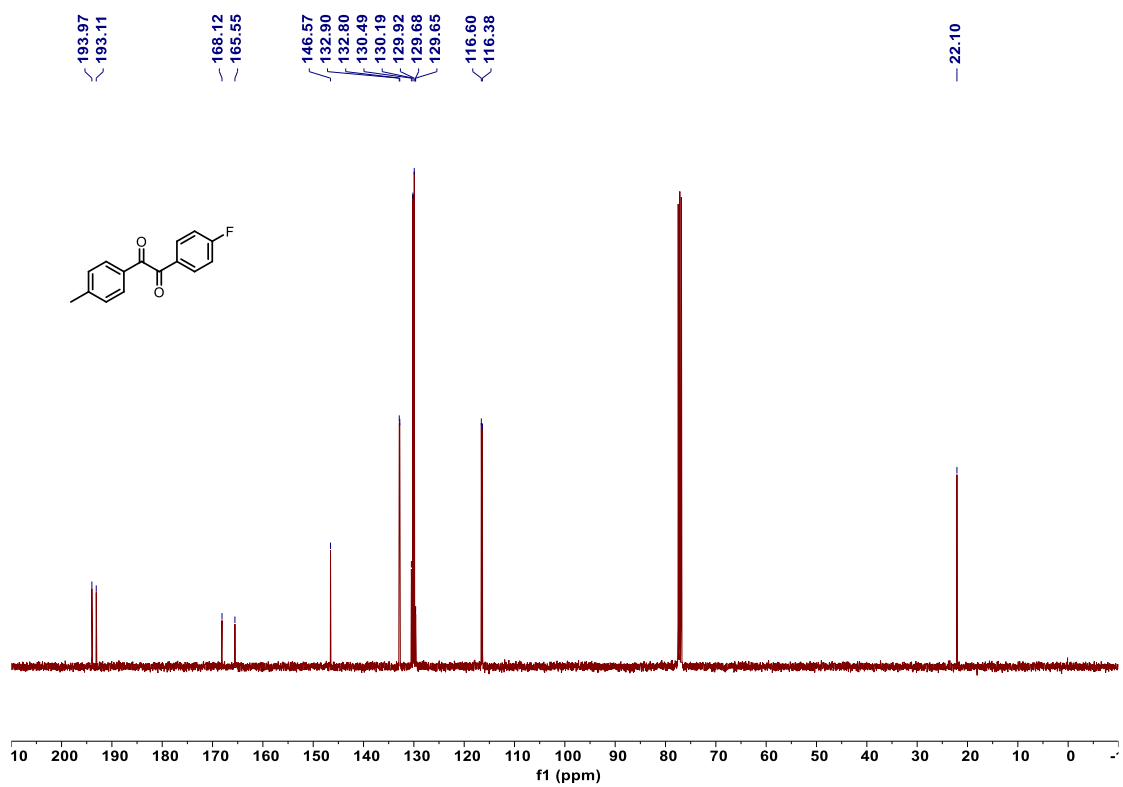

$^{19}\text{F}$  NMR (565MHz,  $\text{CDCl}_3$ ) spectra of compound **1n**

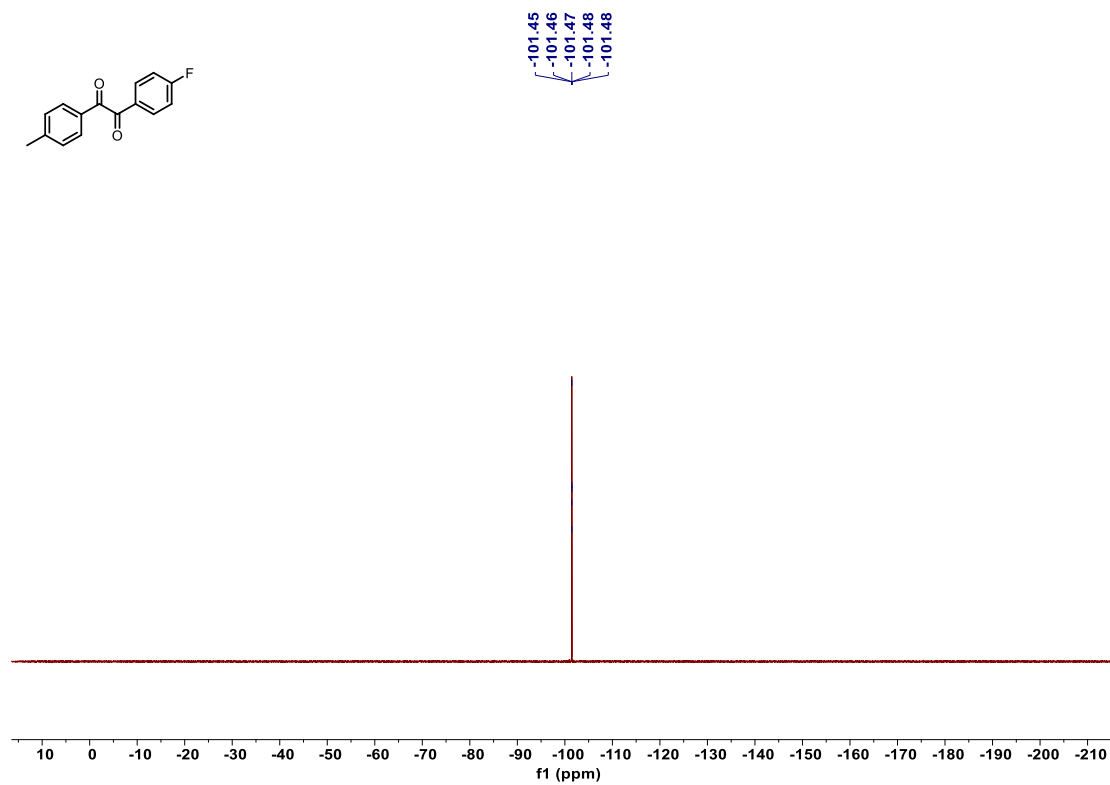

$^1\text{H}$  NMR (400 MHz,  $\text{CDCl}_3$ ) spectra of compound **1o**

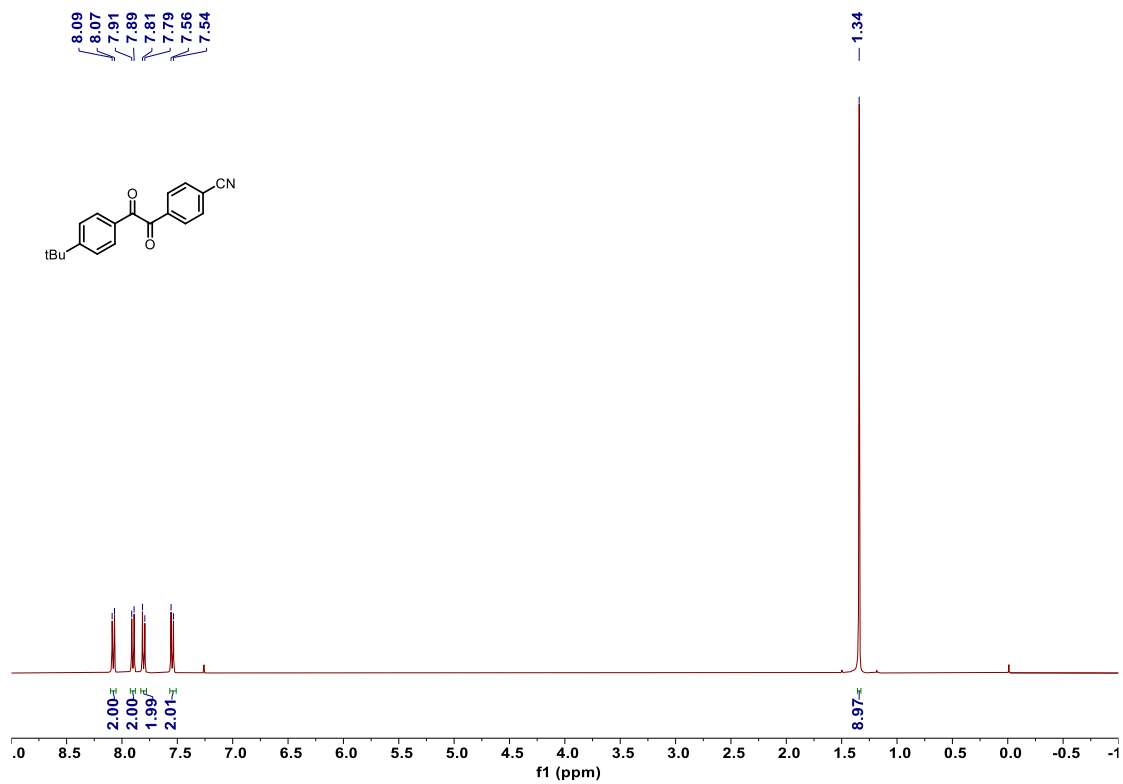

$^{13}\text{C}$  NMR (151 MHz,  $\text{CDCl}_3$ ) spectra of compound **1o**

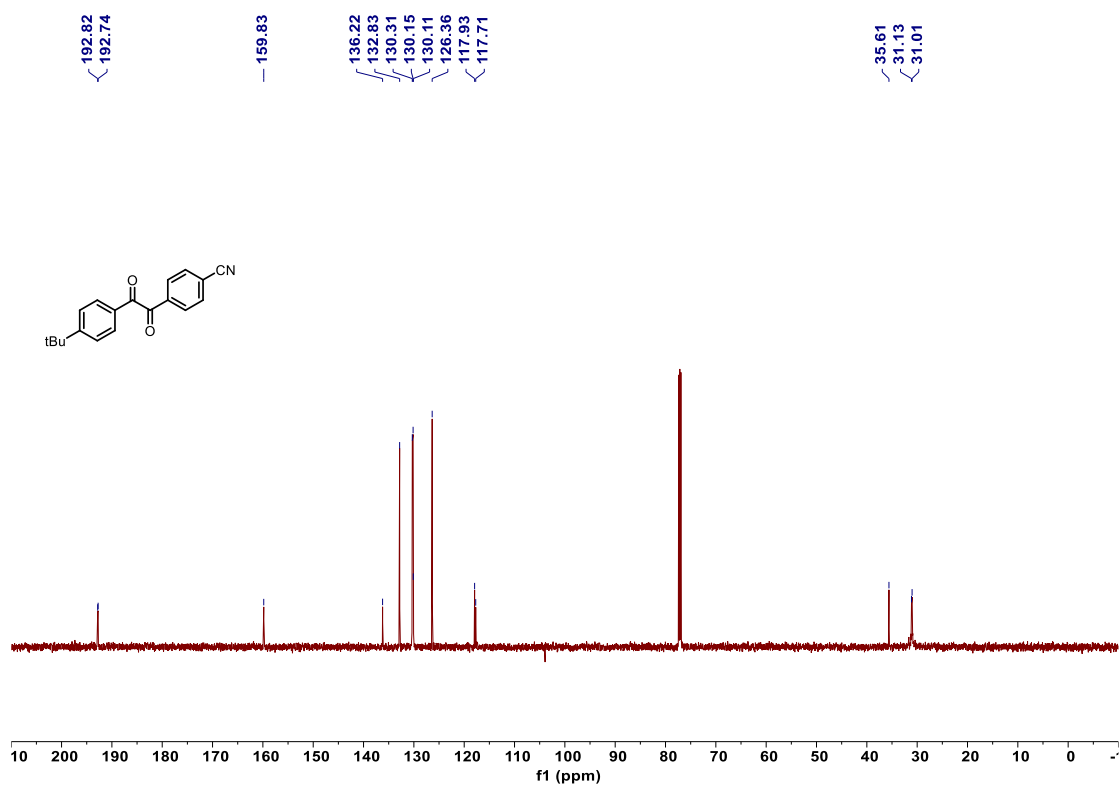

$^1\text{H}$  NMR (600 MHz,  $\text{CDCl}_3$ ) spectra of compound **1p**

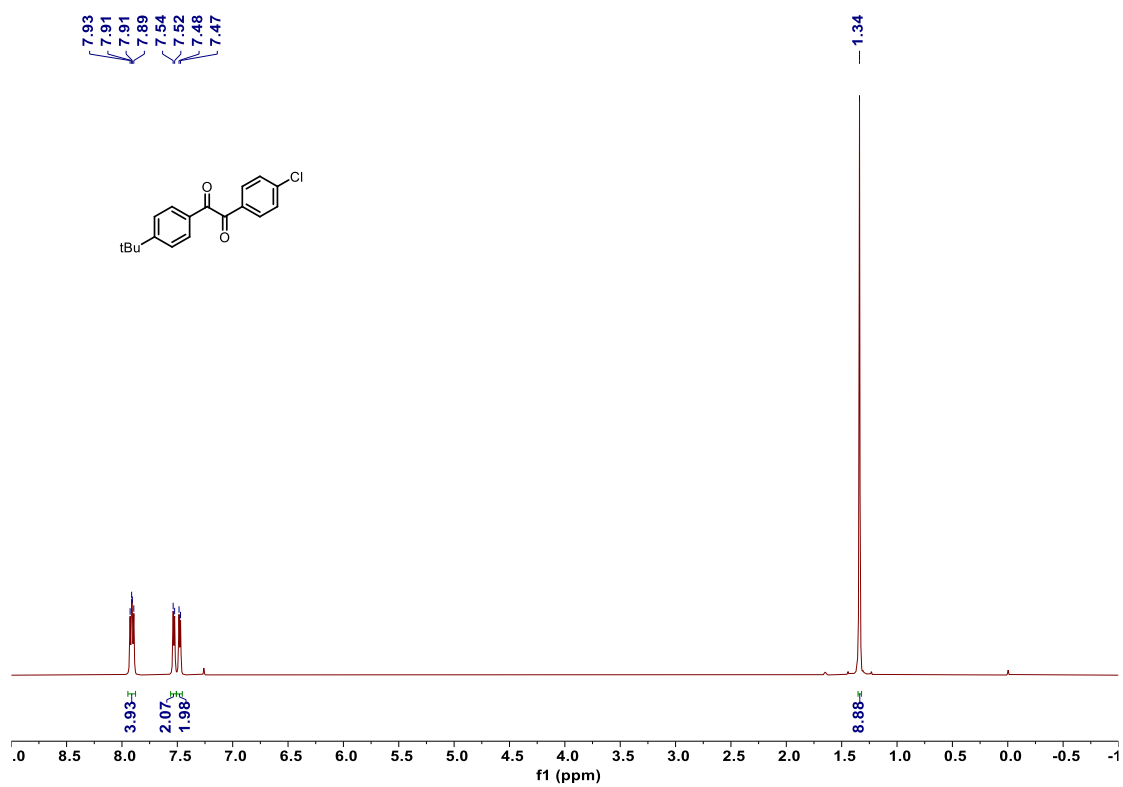



$^{13}\text{C}$  NMR (151 MHz,  $\text{CDCl}_3$ ) spectra of compound **1p**

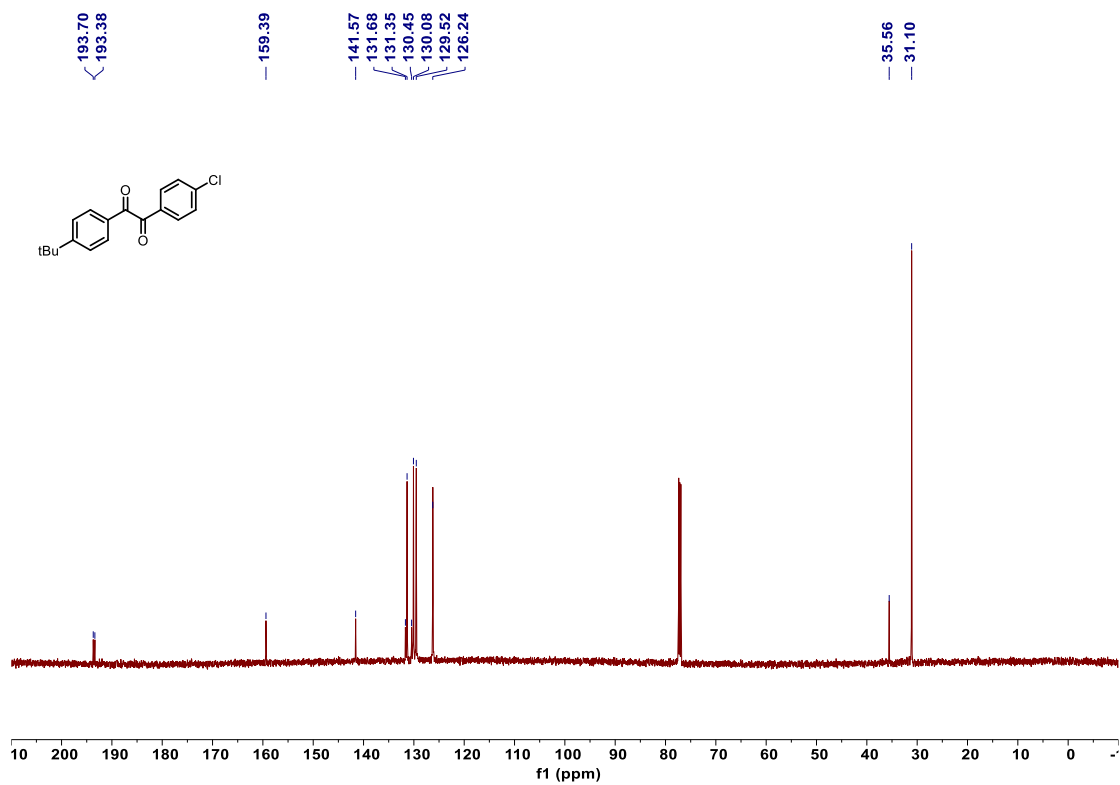

$^1\text{H}$  NMR (600 MHz,  $\text{CDCl}_3$ ) spectra of compound **2a**

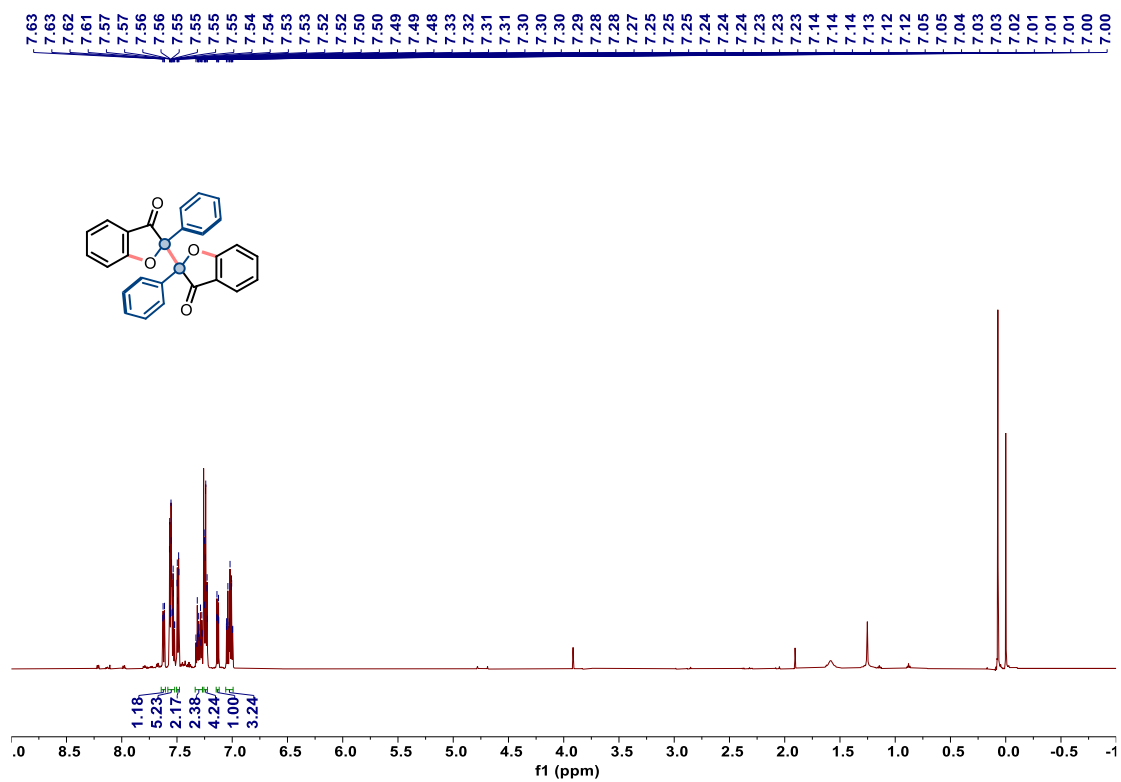

$^{13}\text{C}$  NMR (101 MHz,  $\text{CDCl}_3$ ) spectra of compound **2a**

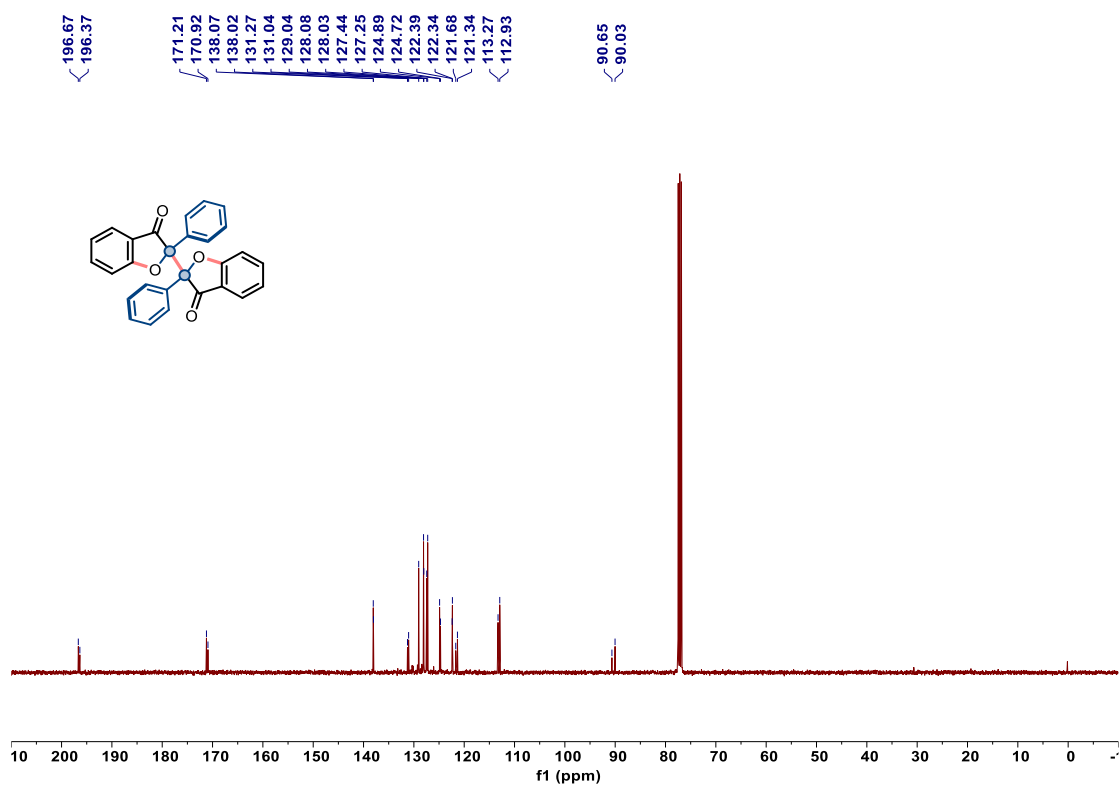

$^1\text{H}$  NMR (400 MHz,  $\text{CDCl}_3$ ) spectra of compound **2b-1**

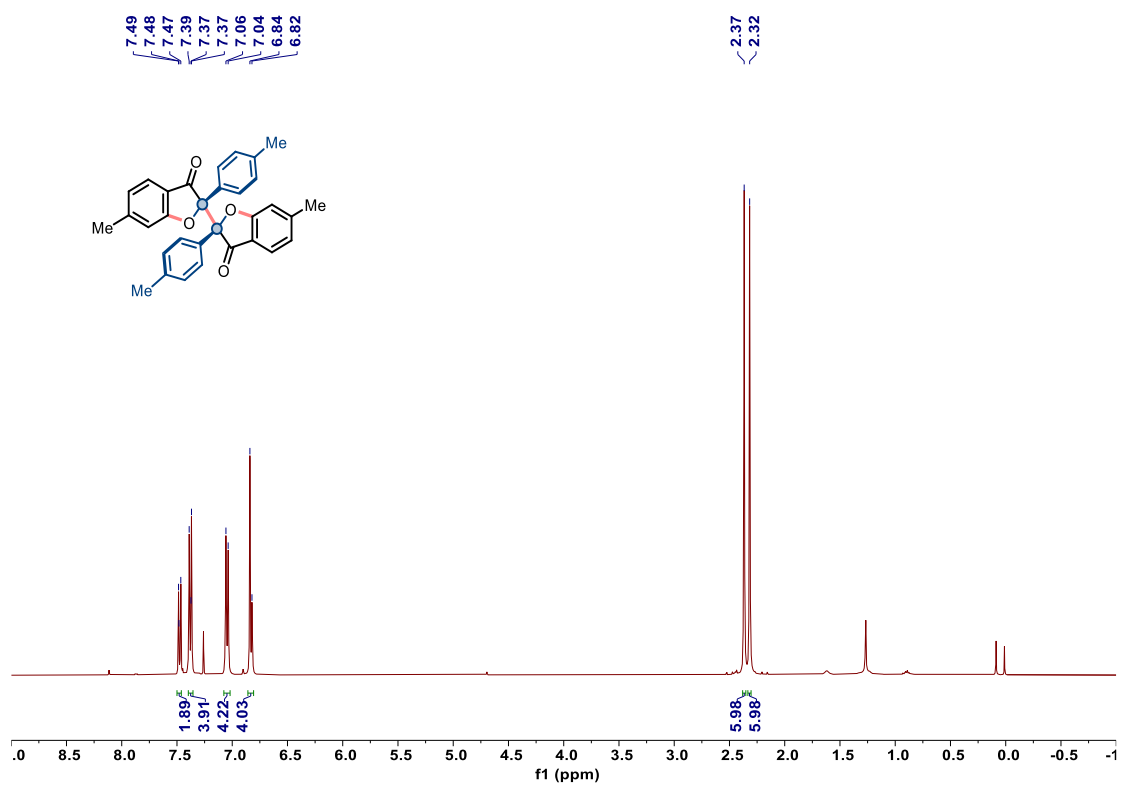

$^{13}\text{C}$  NMR (101 MHz,  $\text{CDCl}_3$ ) spectra of compound **2b-1**

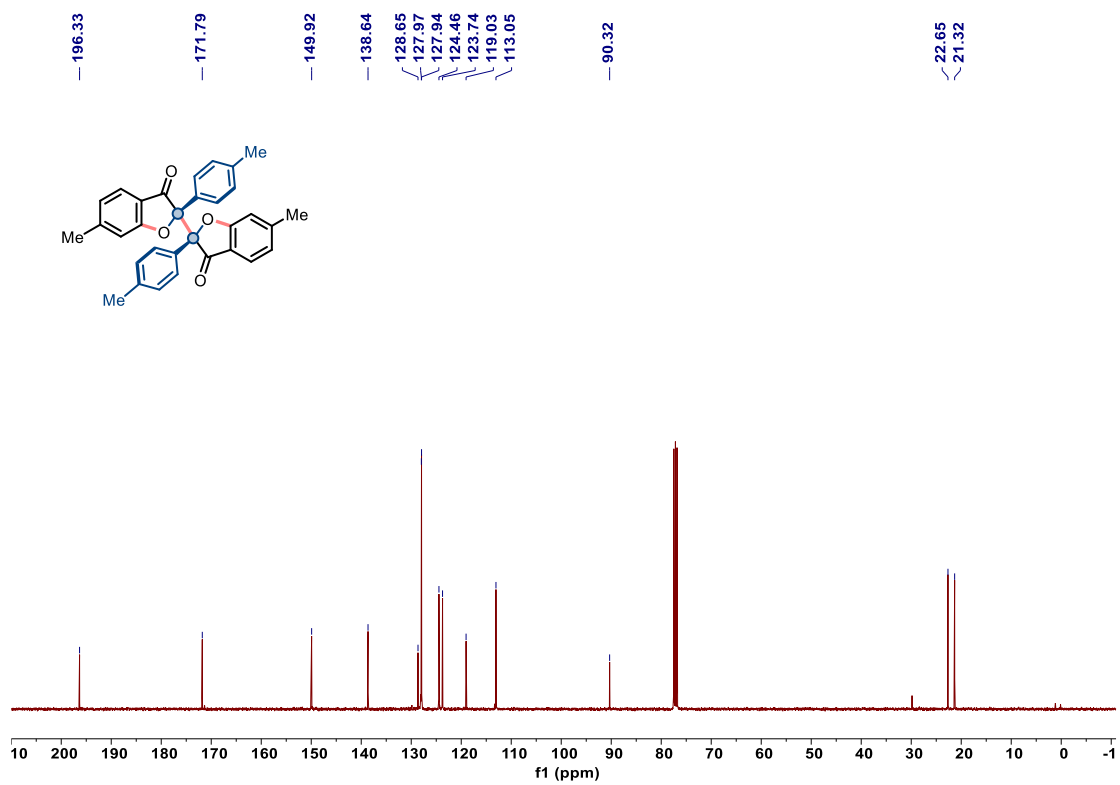

$^1\text{H}$  NMR (600 MHz,  $\text{CDCl}_3$ ) spectra of compound **2b-2**

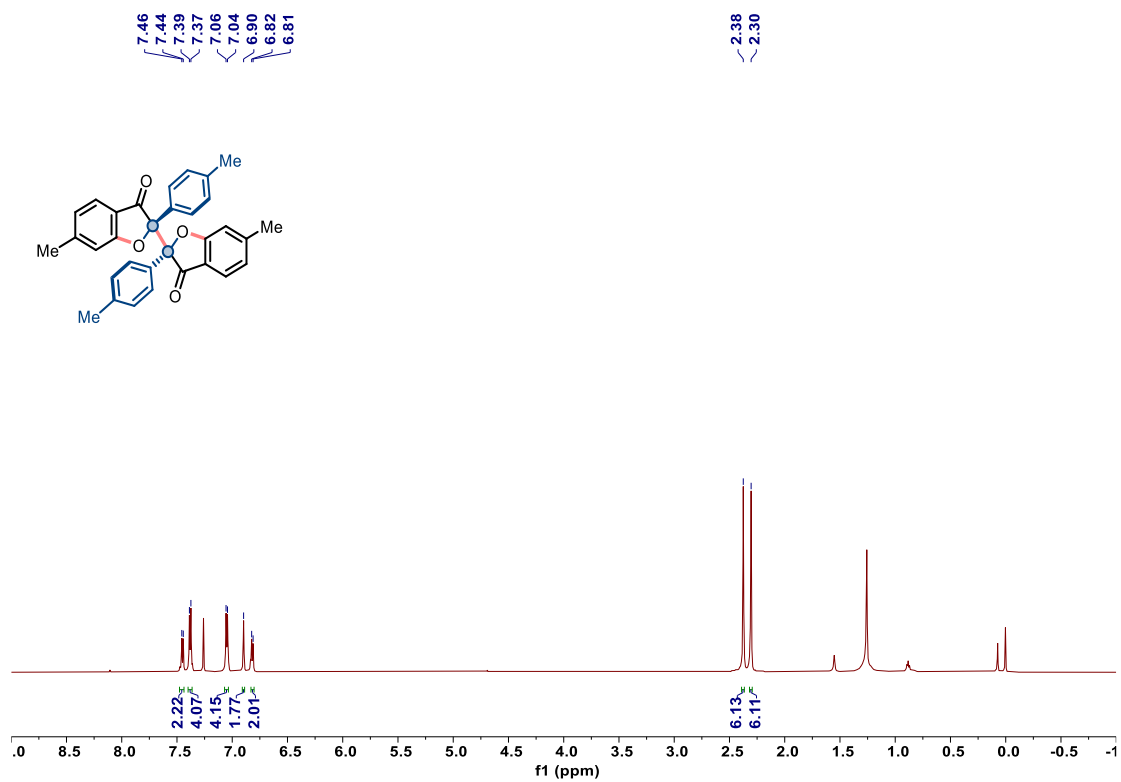

$^{13}\text{C}$  NMR (151 MHz,  $\text{CDCl}_3$ ) spectra of compound **2b-2**

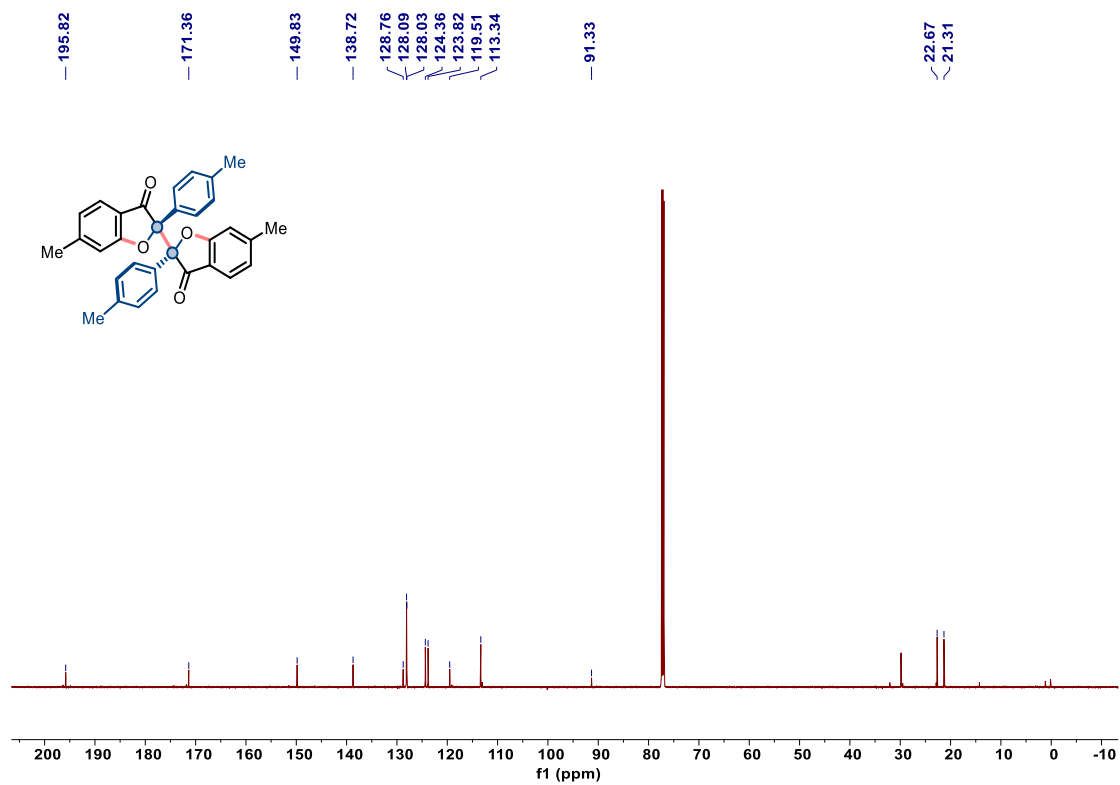

$^1\text{H}$  NMR (400 MHz,  $\text{CDCl}_3$ ) spectra of compound **2c-1**

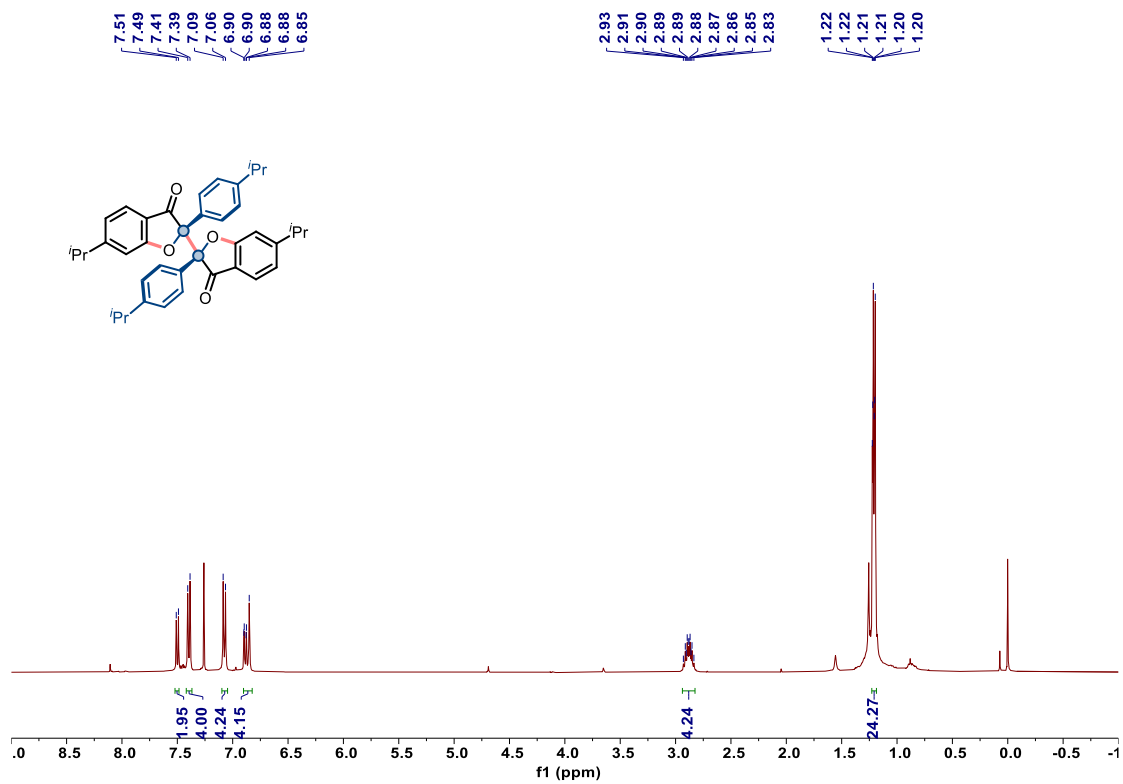

$^{13}\text{C}$  NMR (101 MHz,  $\text{CDCl}_3$ ) spectra of compound **2c-1**

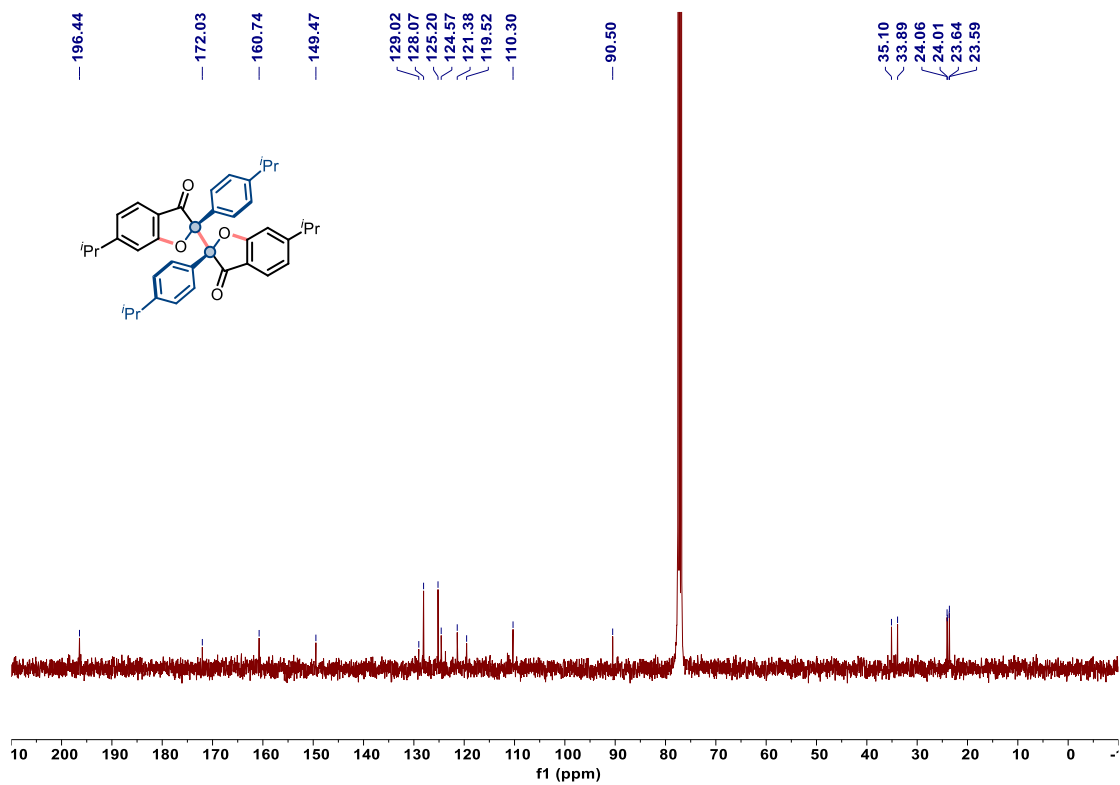

$^1\text{H}$  NMR (400 MHz,  $\text{CDCl}_3$ ) spectra of compound **2c-2**

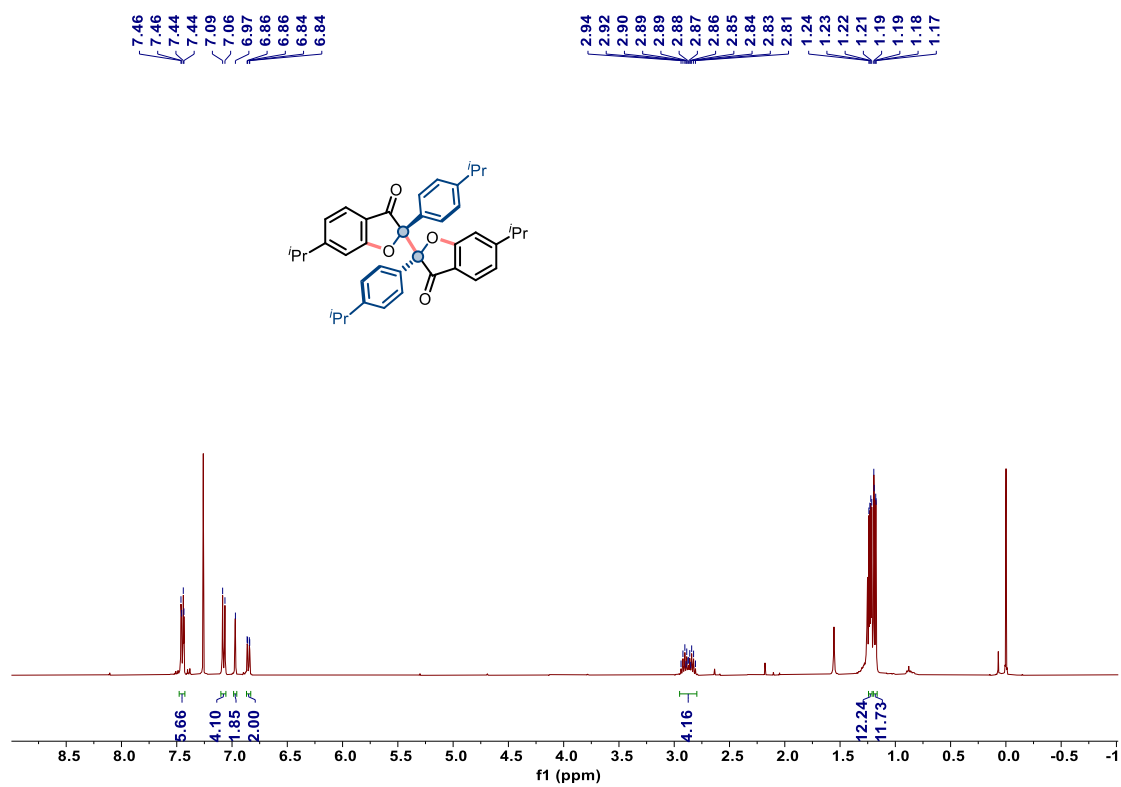

$^{13}\text{C}$  NMR (101 MHz,  $\text{CDCl}_3$ ) spectra of compound **2c-2**

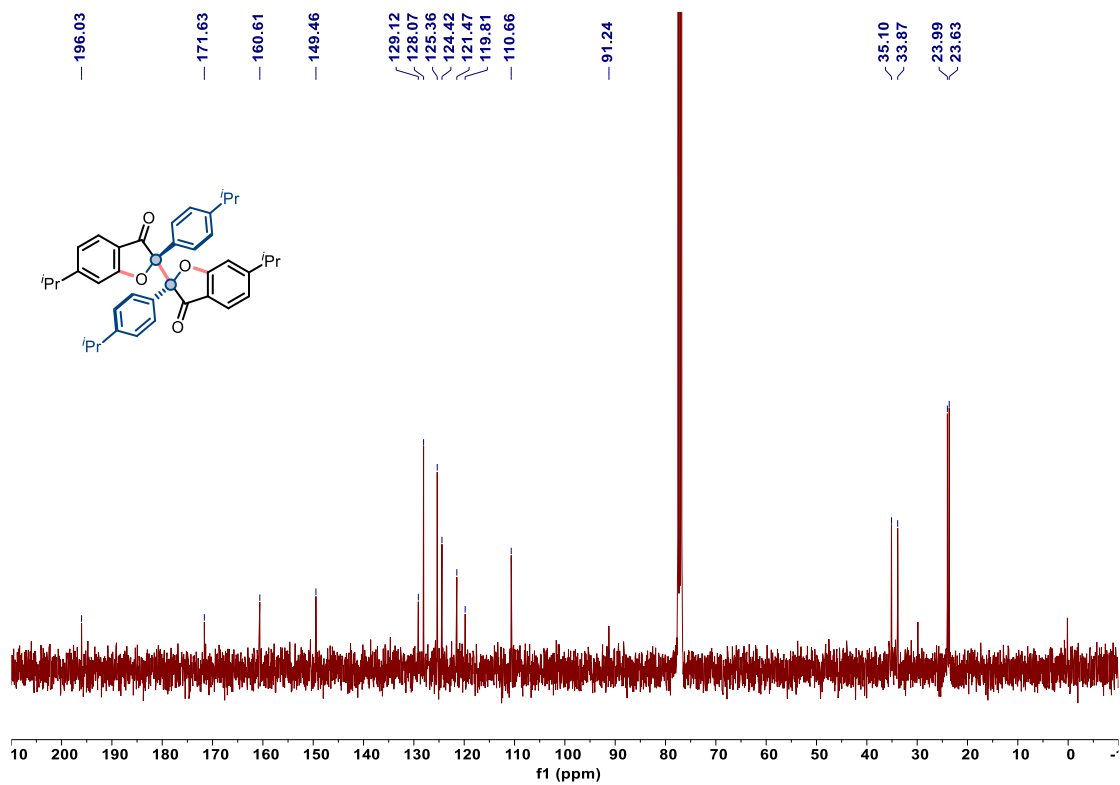

$^1\text{H}$  NMR (400 MHz,  $\text{CDCl}_3$ ) spectra of compound **2d-1**

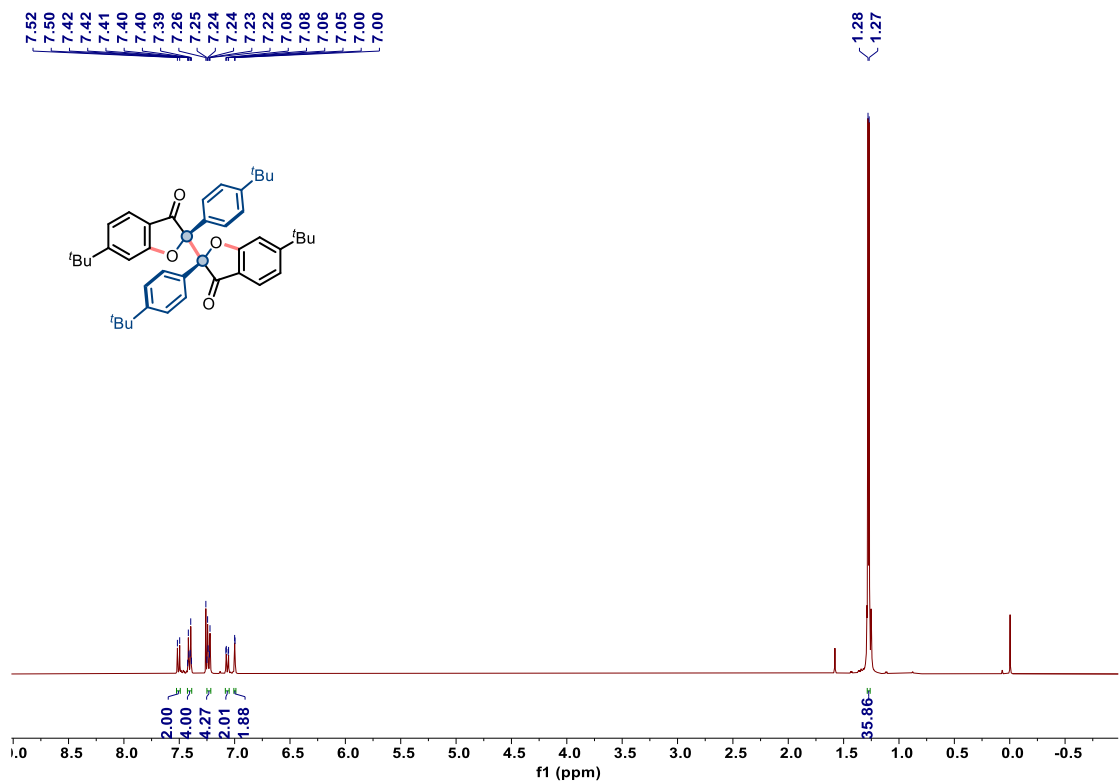

$^{13}\text{C}$  NMR (101 MHz,  $\text{CDCl}_3$ ) spectra of compound **2d-1**

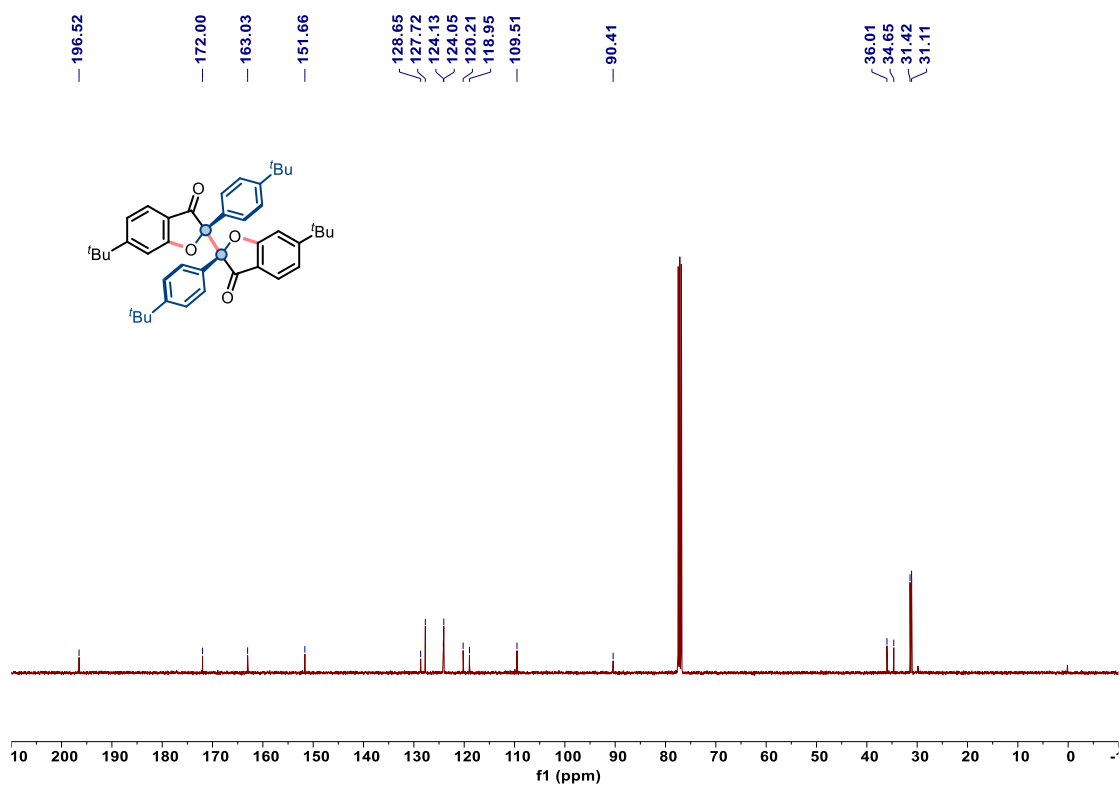

$^1\text{H}$  NMR (400 MHz,  $\text{CDCl}_3$ ) spectra of compound **2d-2**

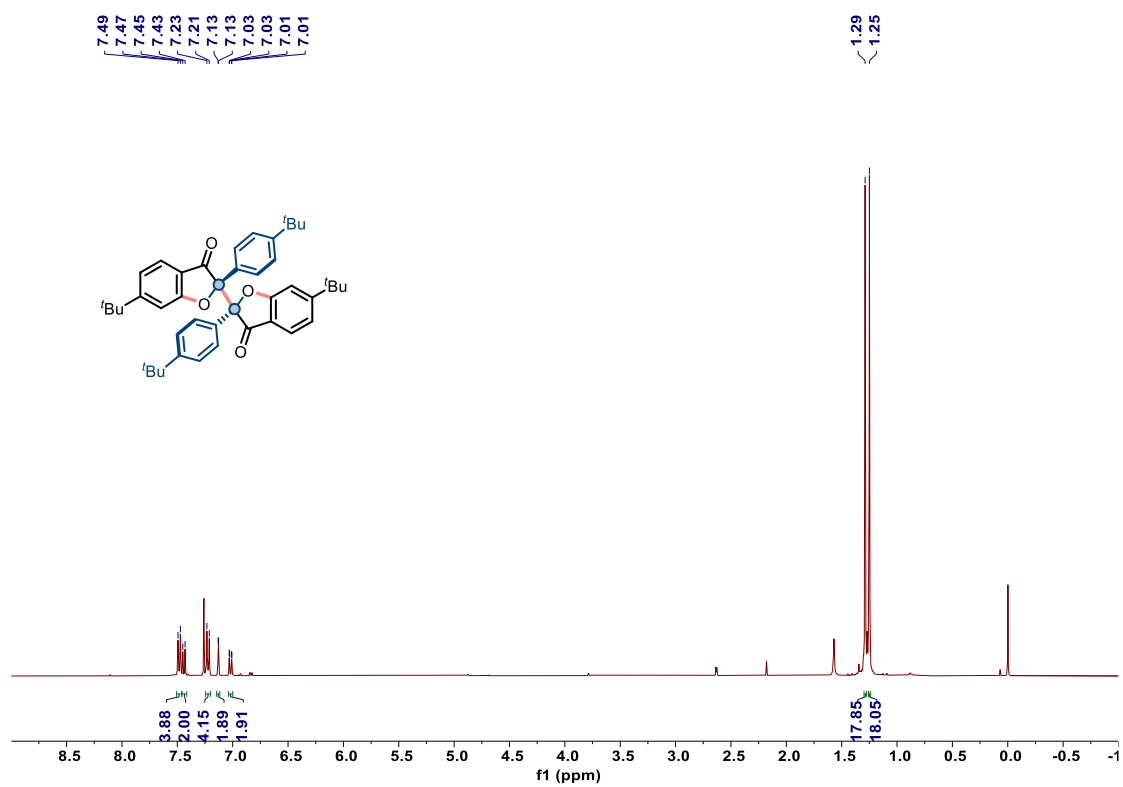

$^{13}\text{C}$  NMR (101 MHz,  $\text{CDCl}_3$ ) spectra of compound **2d-2**

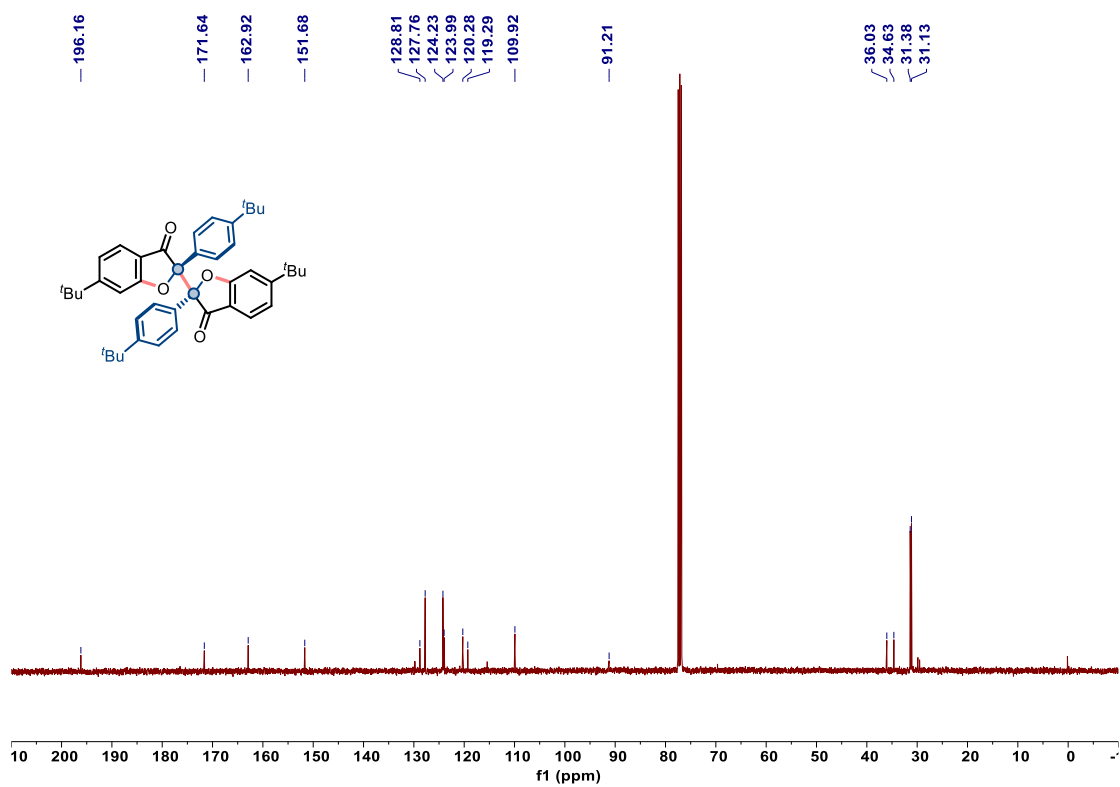

$^1\text{H}$  NMR (600 MHz,  $\text{CDCl}_3$ ) spectra of compound **2e**

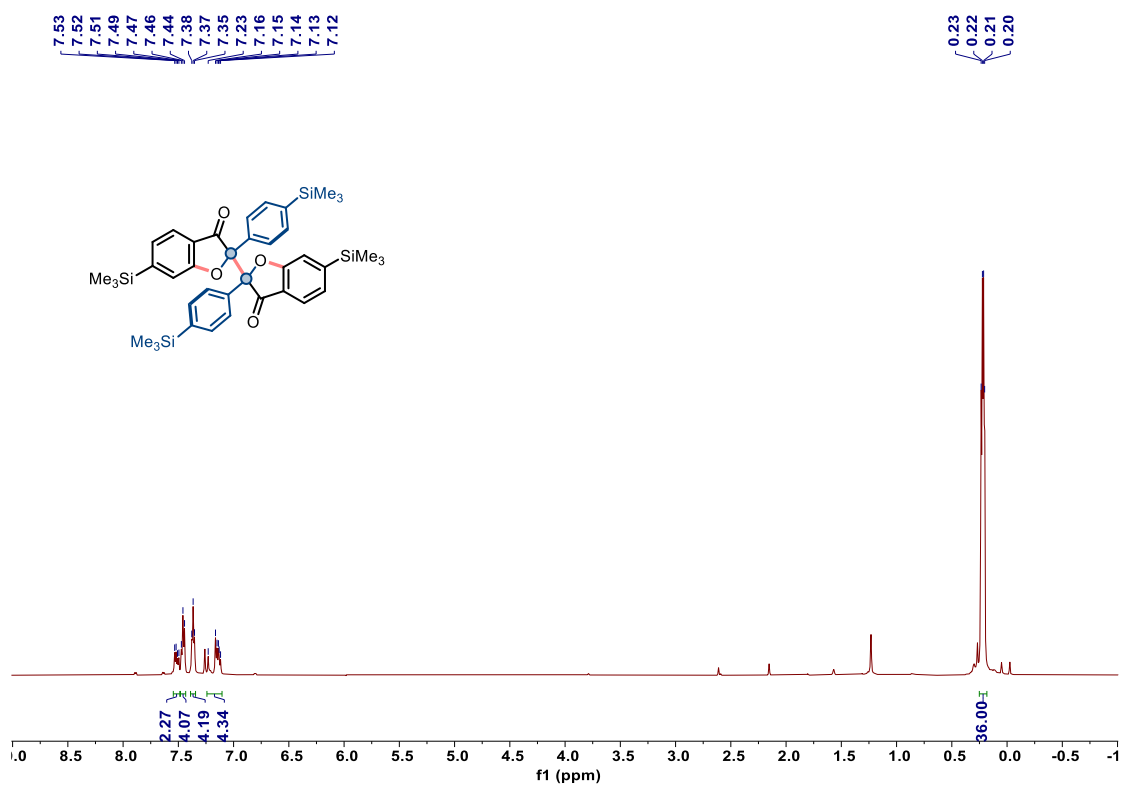



$^{13}\text{C}$  NMR (101 MHz,  $\text{CDCl}_3$ ) spectra of compound **2e**

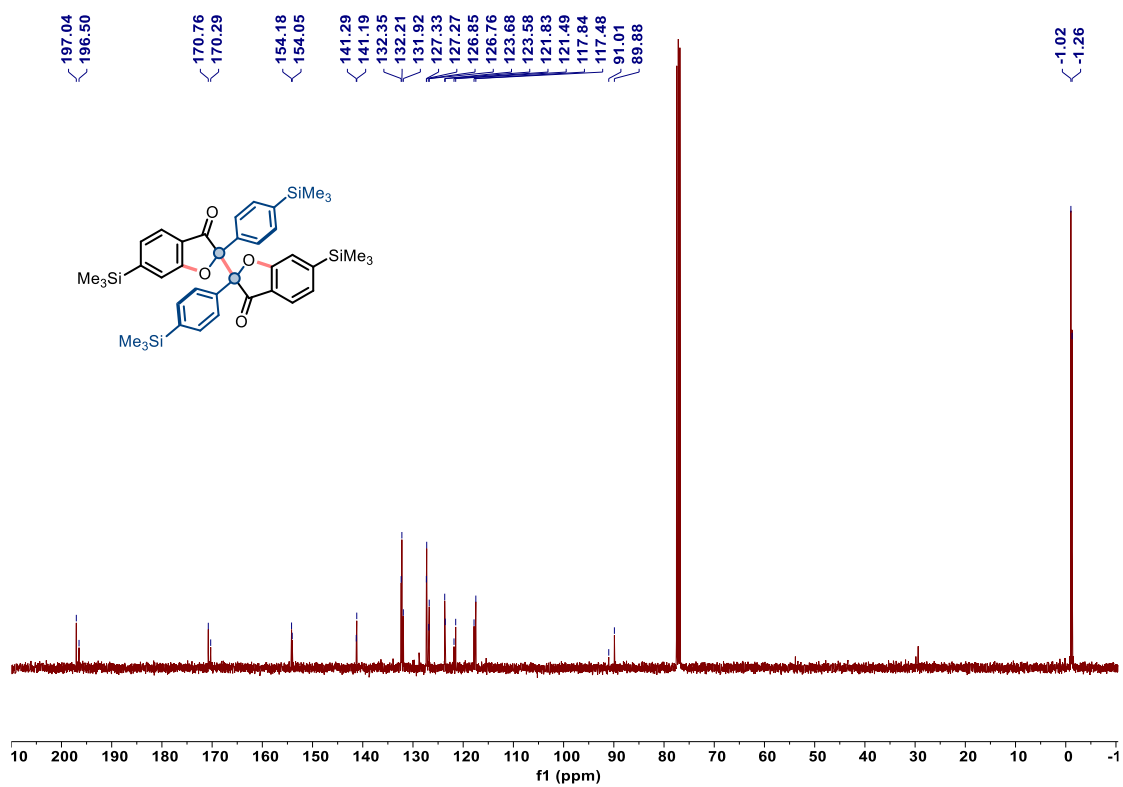

$^1\text{H}$  NMR (400 MHz,  $\text{CDCl}_3$ ) spectra of compound **2f**

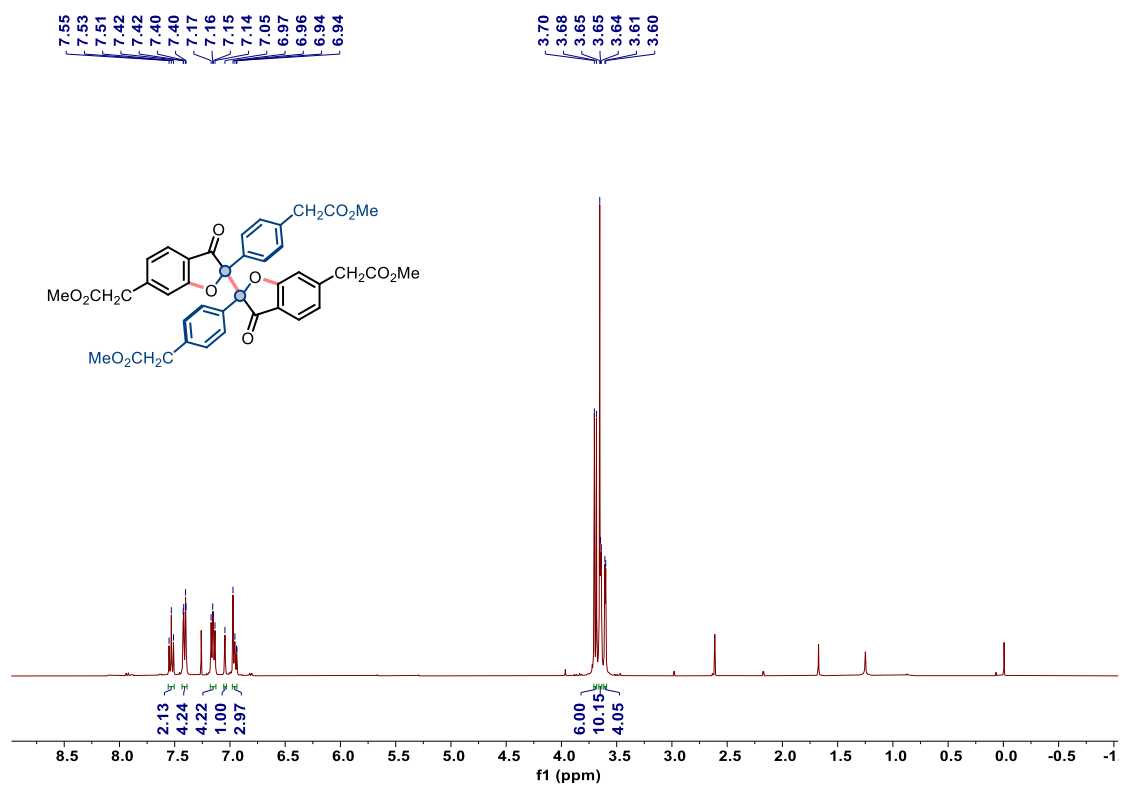

$^{13}\text{C}$  NMR (101 MHz,  $\text{CDCl}_3$ ) spectra of compound **2f**

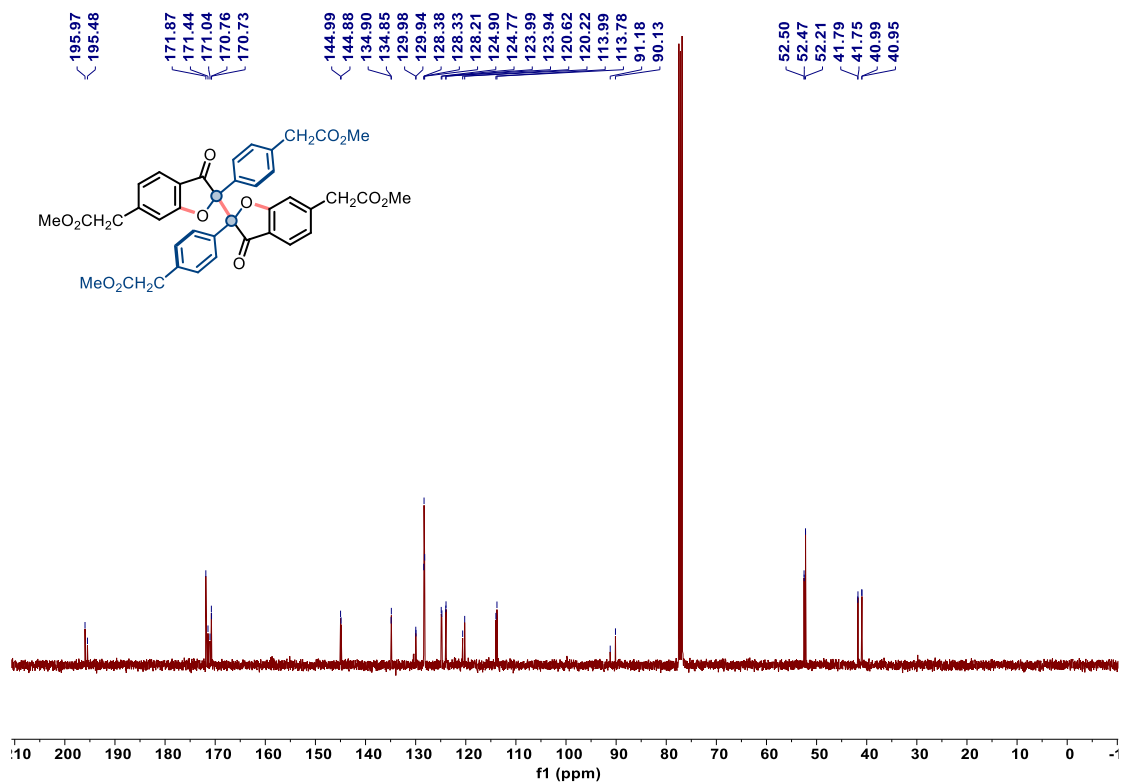

$^1\text{H}$  NMR (400 MHz,  $\text{CDCl}_3$ ) spectra of compound **2g-1**

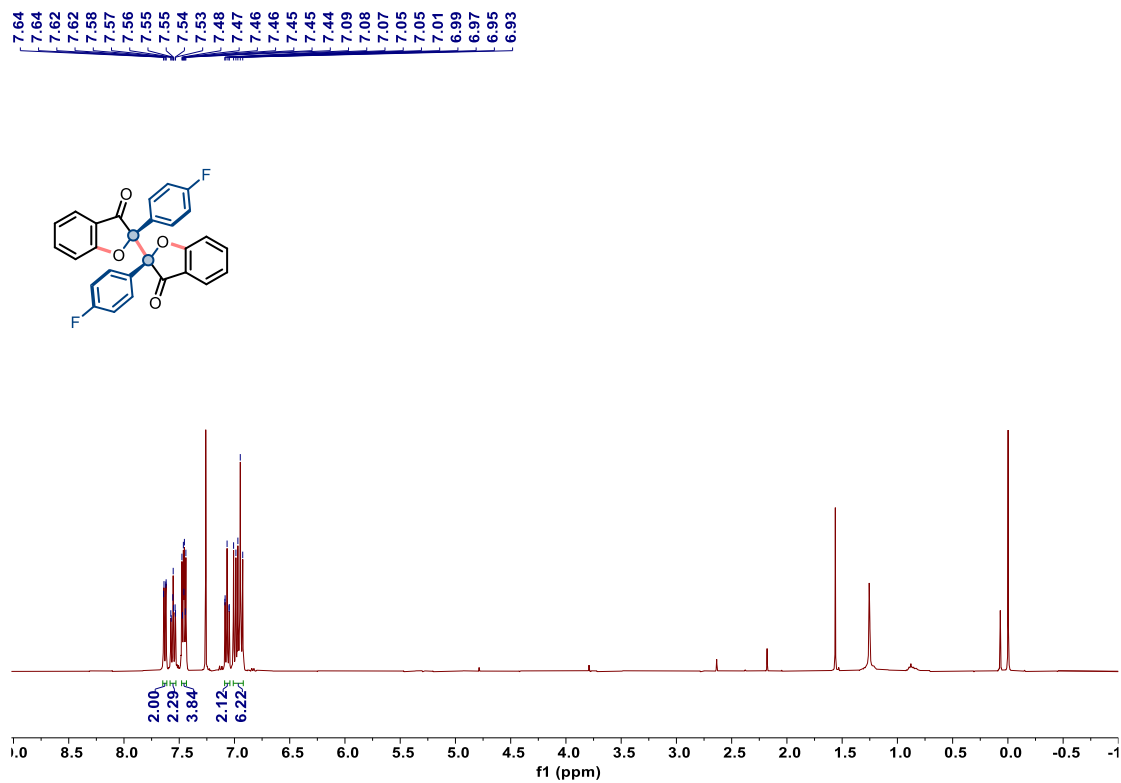

$^{13}\text{C}$  NMR (101 MHz,  $\text{CDCl}_3$ ) spectra of compound **2g-1**

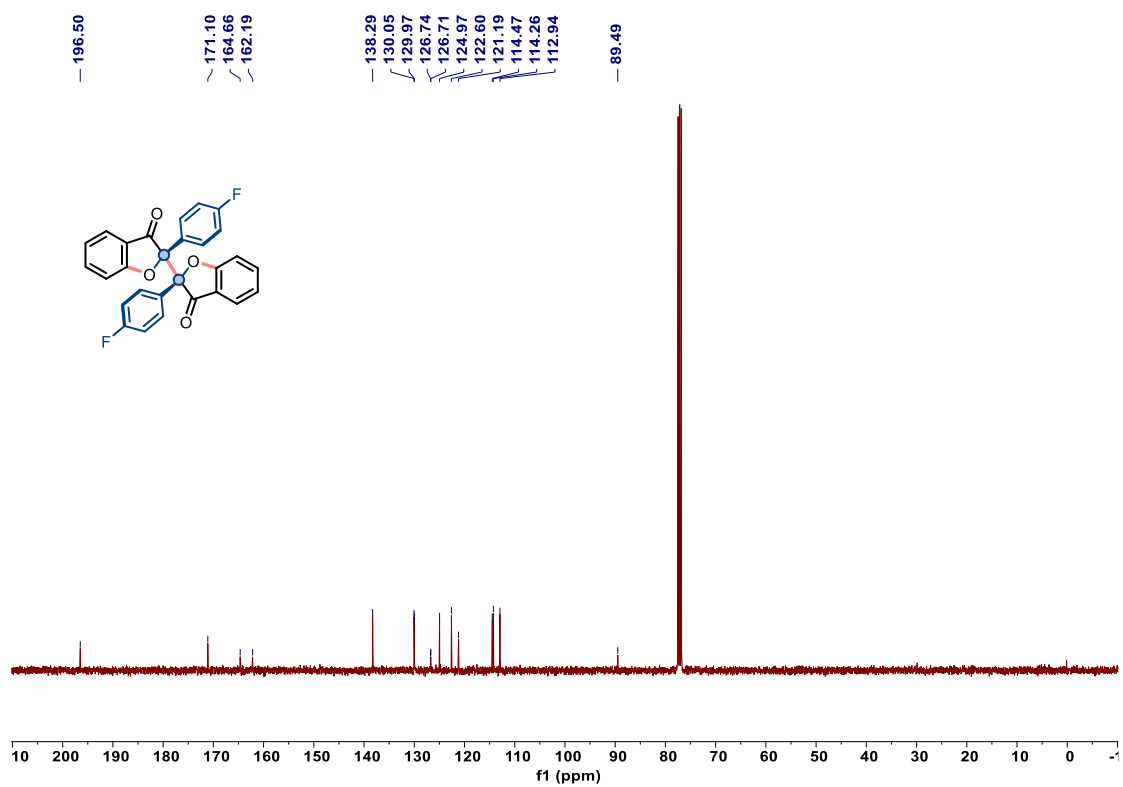

$^{19}\text{F}$  NMR (376 MHz,  $\text{CDCl}_3$ ) spectra of compound **2g-1**

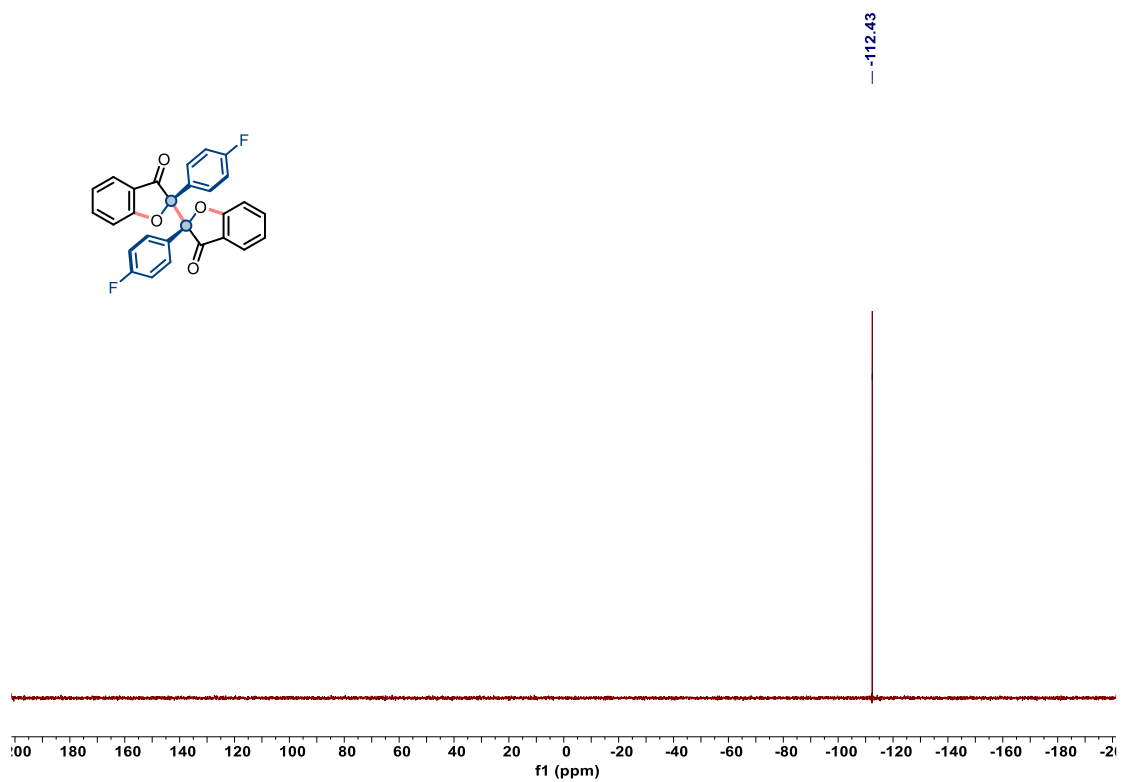

$^1\text{H}$  NMR (400 MHz,  $\text{CDCl}_3$ ) spectra of compound **2g-2**

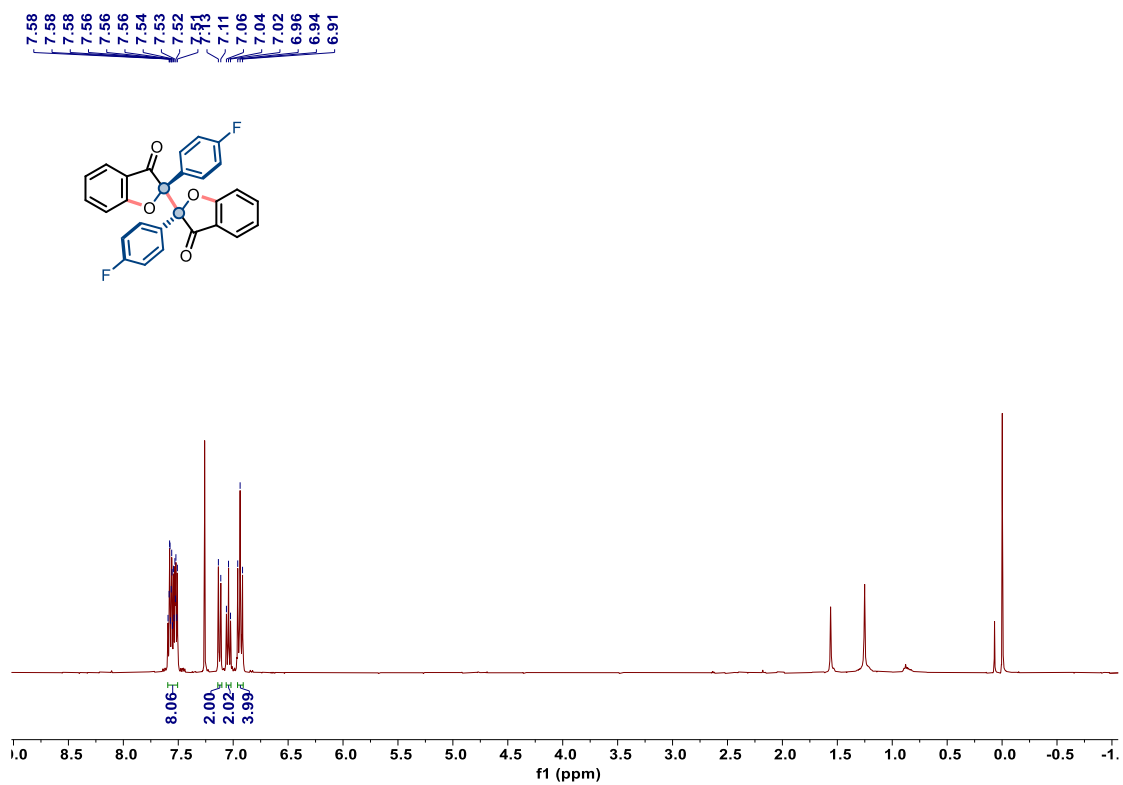

$^{13}\text{C}$  NMR (101 MHz,  $\text{CDCl}_3$ ) spectra of compound **2g-2**

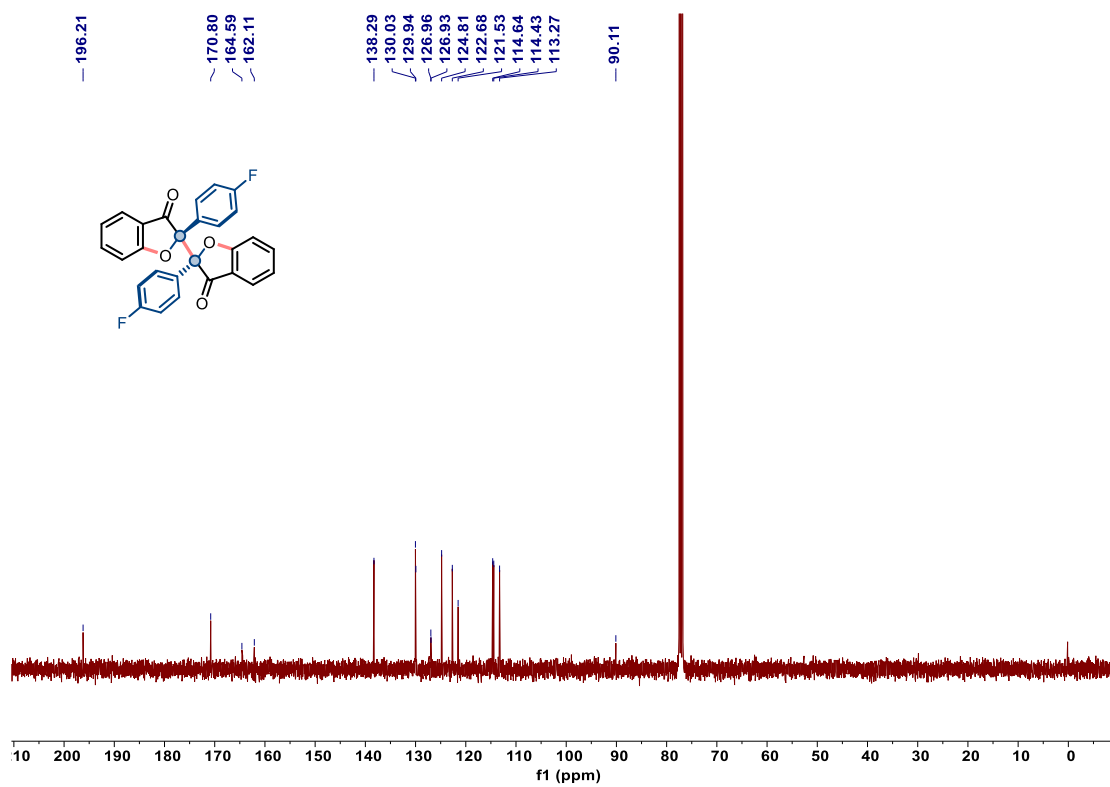

$^{19}\text{F}$  NMR (376 MHz,  $\text{CDCl}_3$ ) spectra of compound **2g-2**

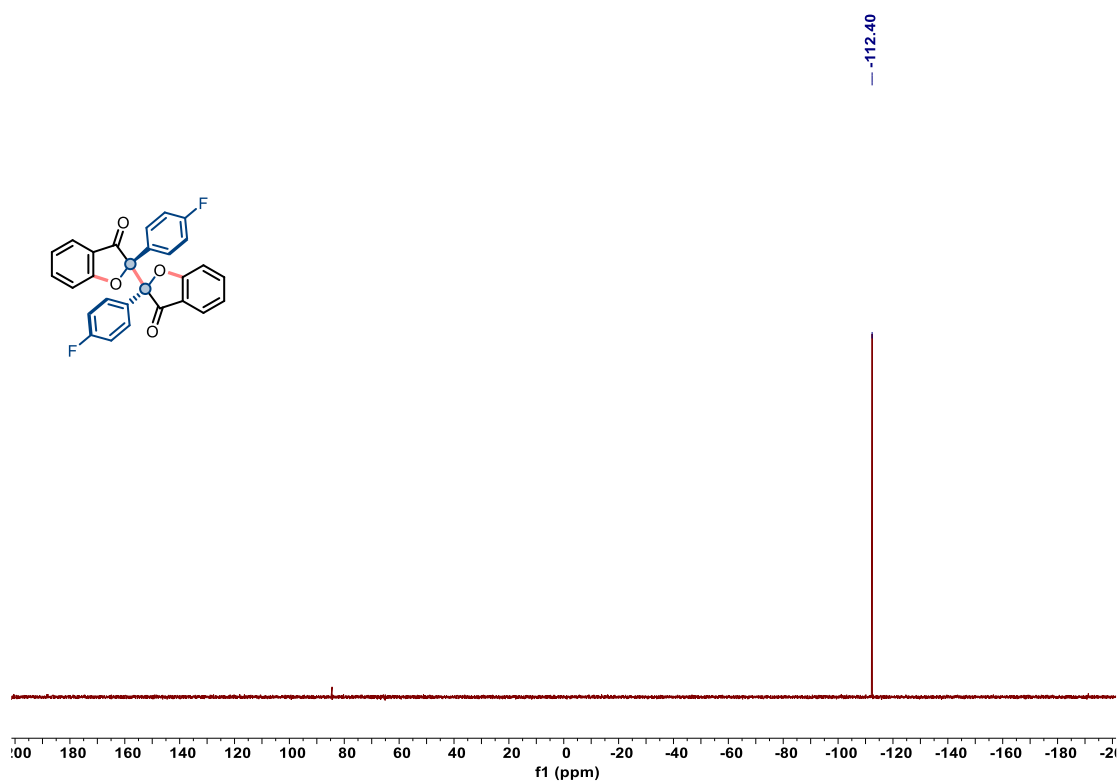

$^1\text{H}$  NMR (400 MHz,  $\text{CDCl}_3$ ) spectra of compound **2h-1**

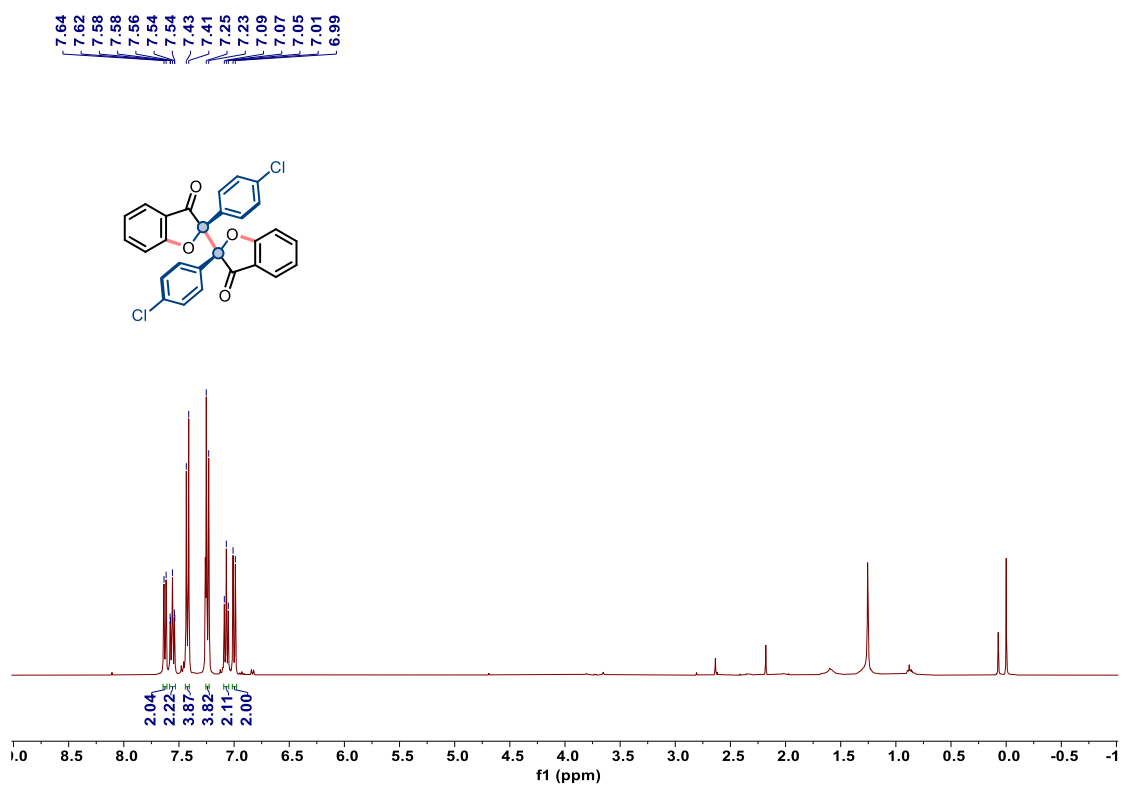

$^{13}\text{C}$  NMR (101 MHz,  $\text{CDCl}_3$ ) spectra of compound **2h-1**

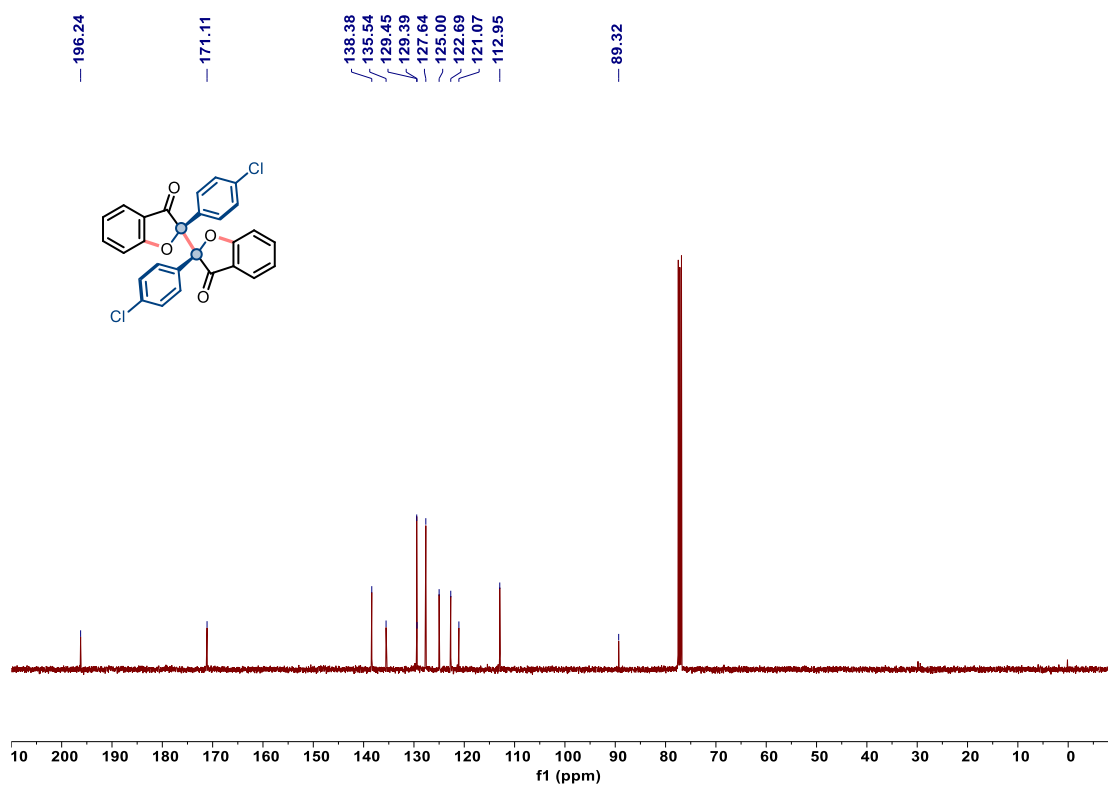

$^1\text{H}$  NMR (400 MHz,  $\text{CDCl}_3$ ) spectra of compound **2h-2**

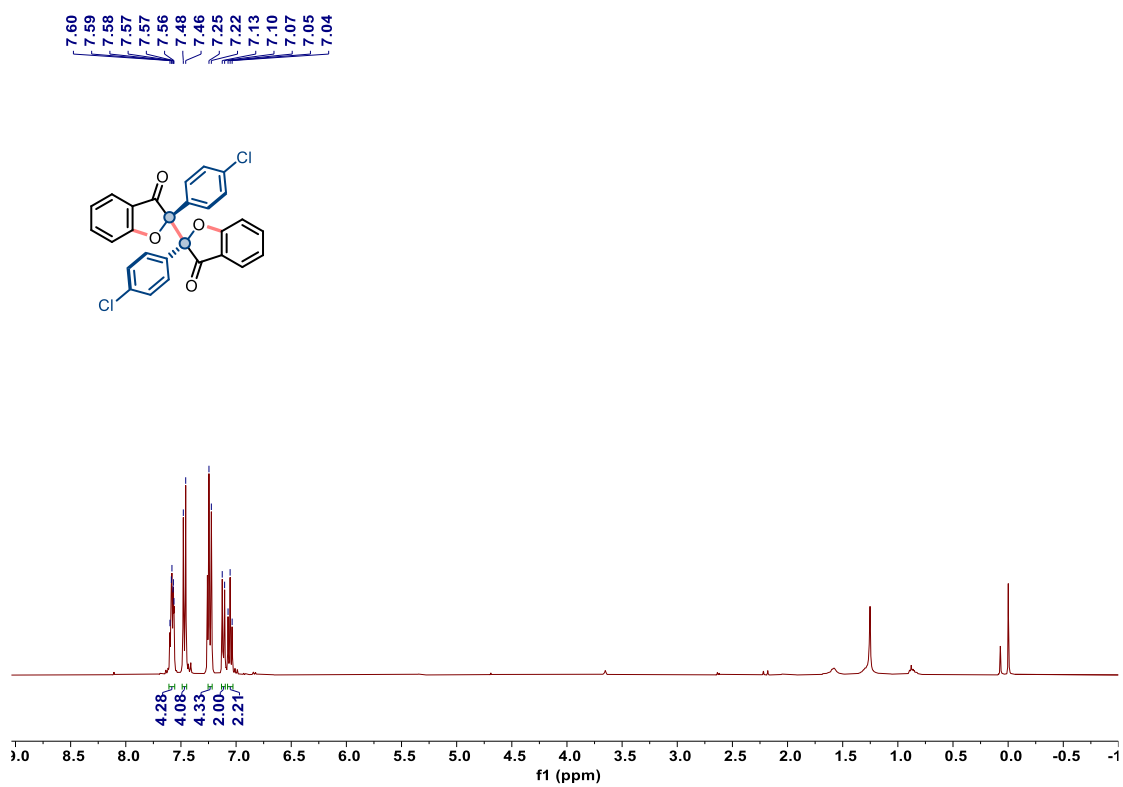

$^{13}\text{C}$  NMR (101 MHz,  $\text{CDCl}_3$ ) spectra of compound **2h-2**

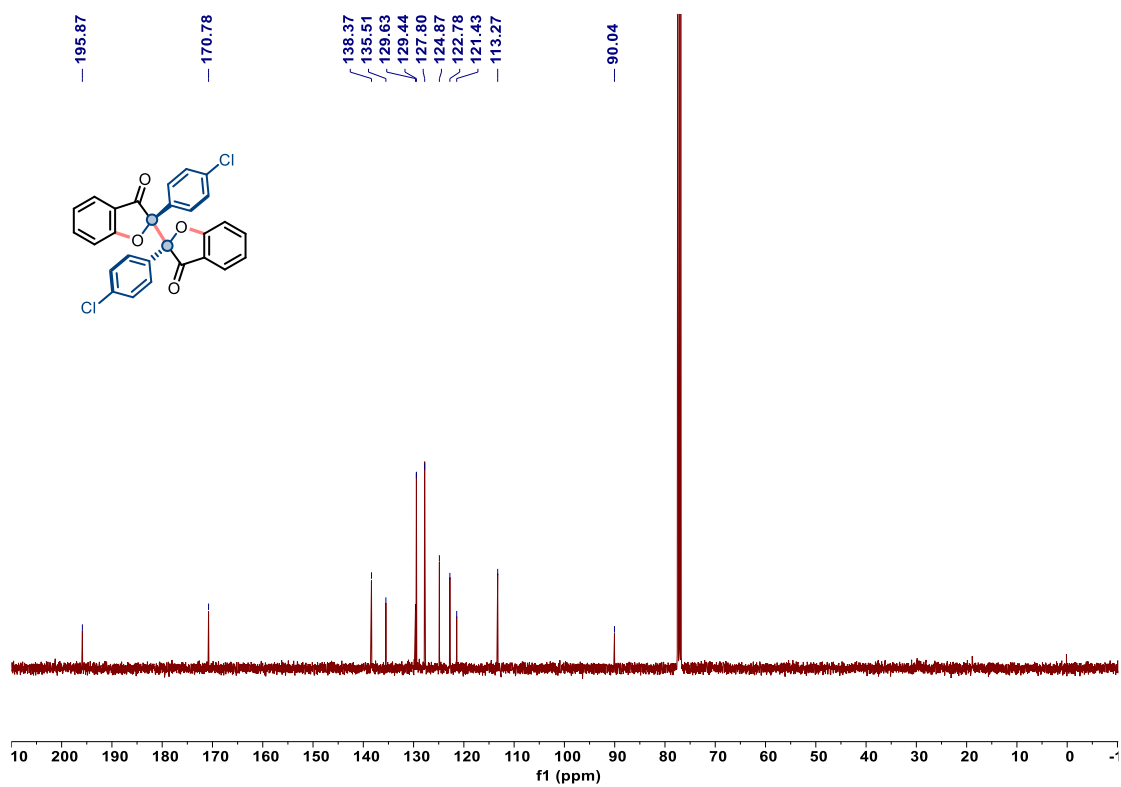

$^1\text{H}$  NMR (600 MHz,  $\text{CDCl}_3$ ) spectra of compound **2i-1**

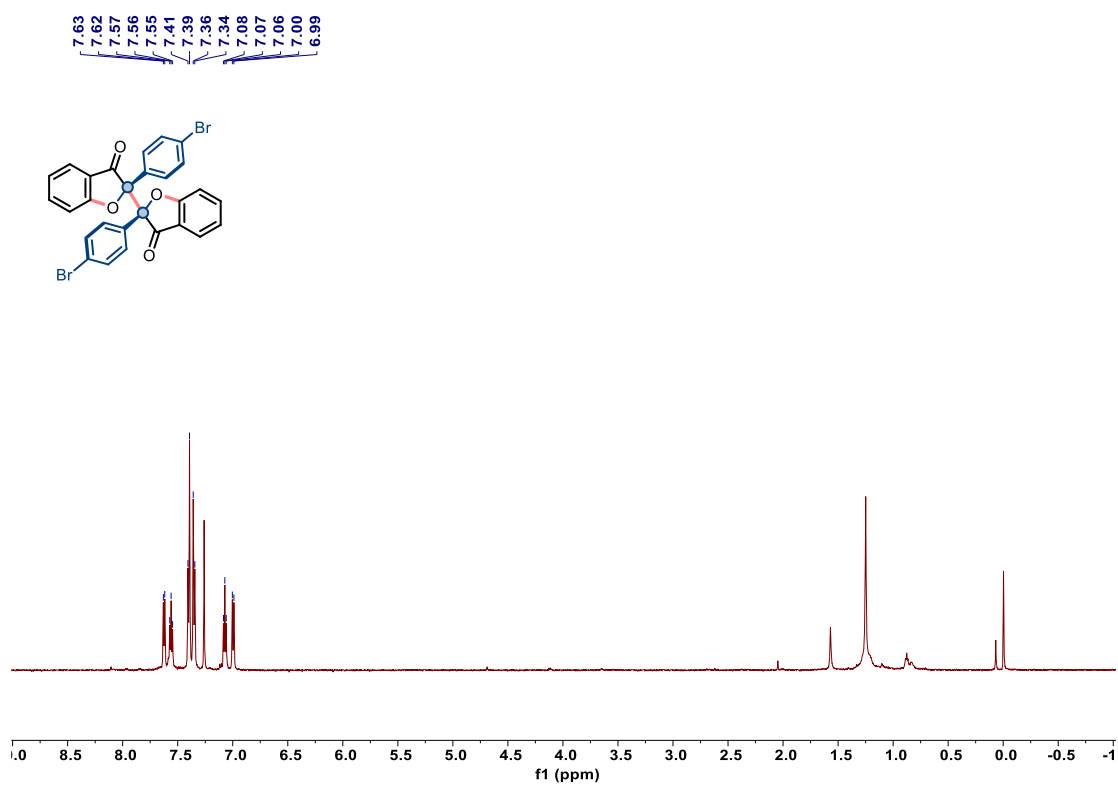

$^{13}\text{C}$  NMR (151 MHz,  $\text{CDCl}_3$ ) spectra of compound **2i-1**

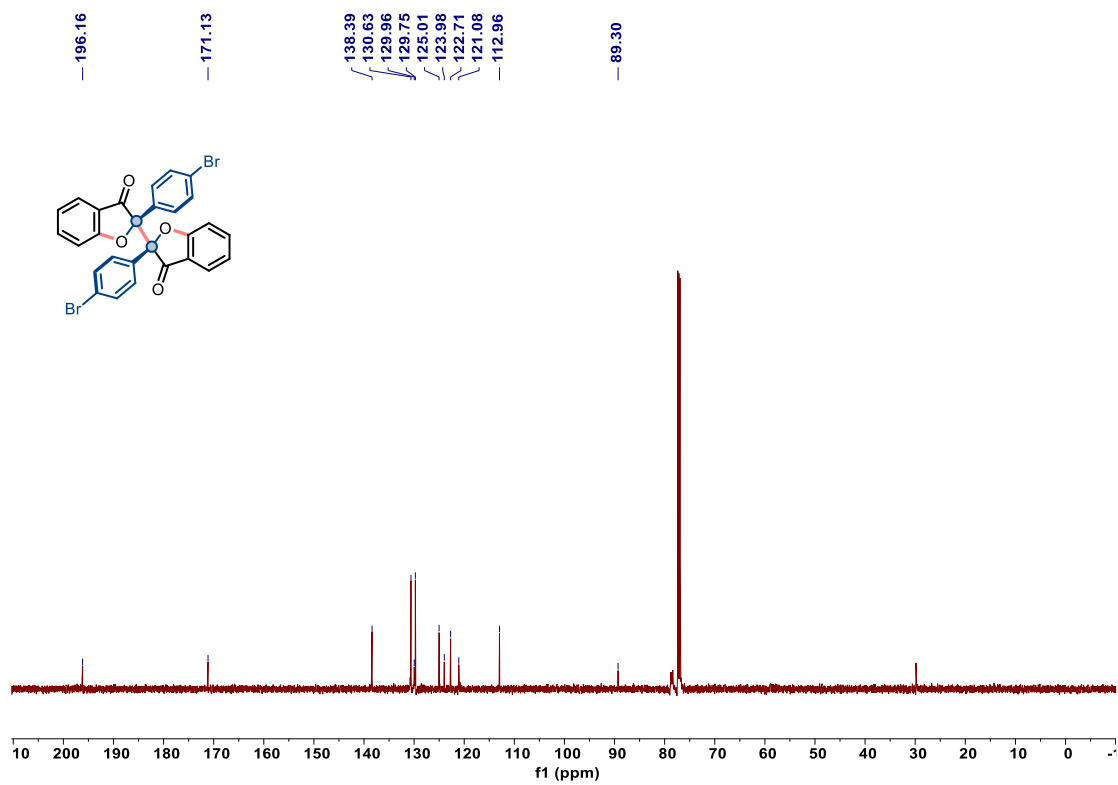

$^1\text{H}$  NMR (600 MHz,  $\text{CDCl}_3$ ) spectra of compound **2i-2**

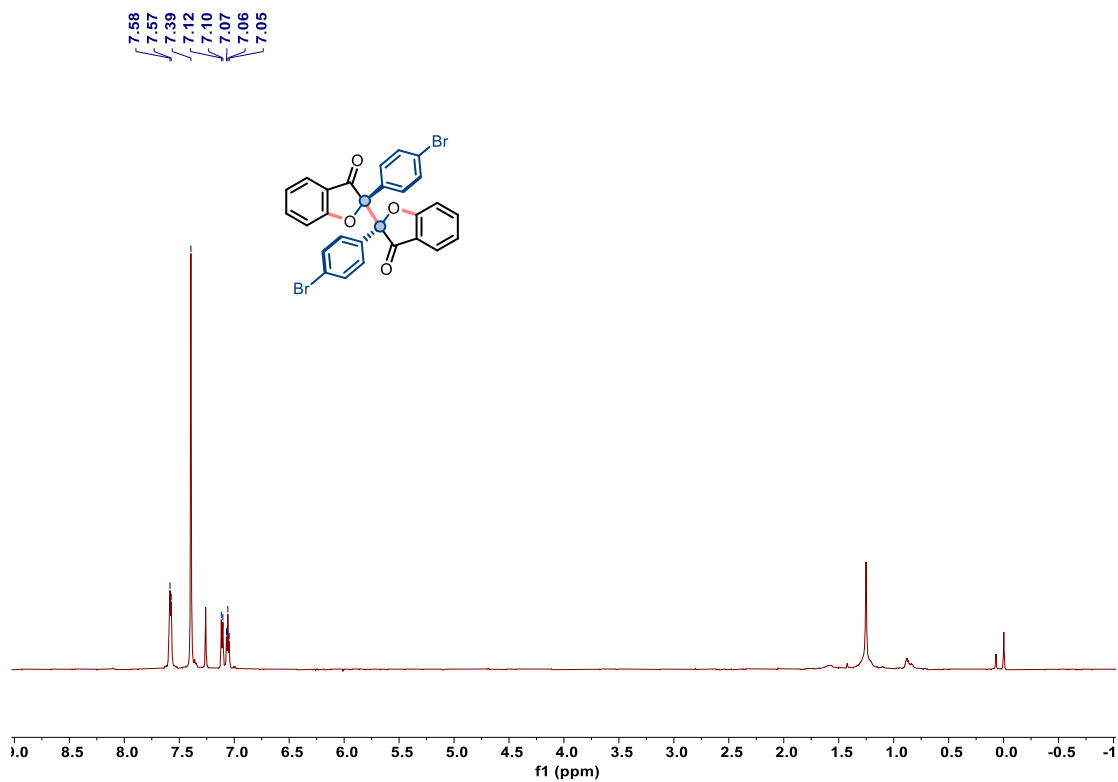



$^{13}\text{C}$  NMR (101 MHz,  $\text{CDCl}_3$ ) spectra of compound **2i-2**

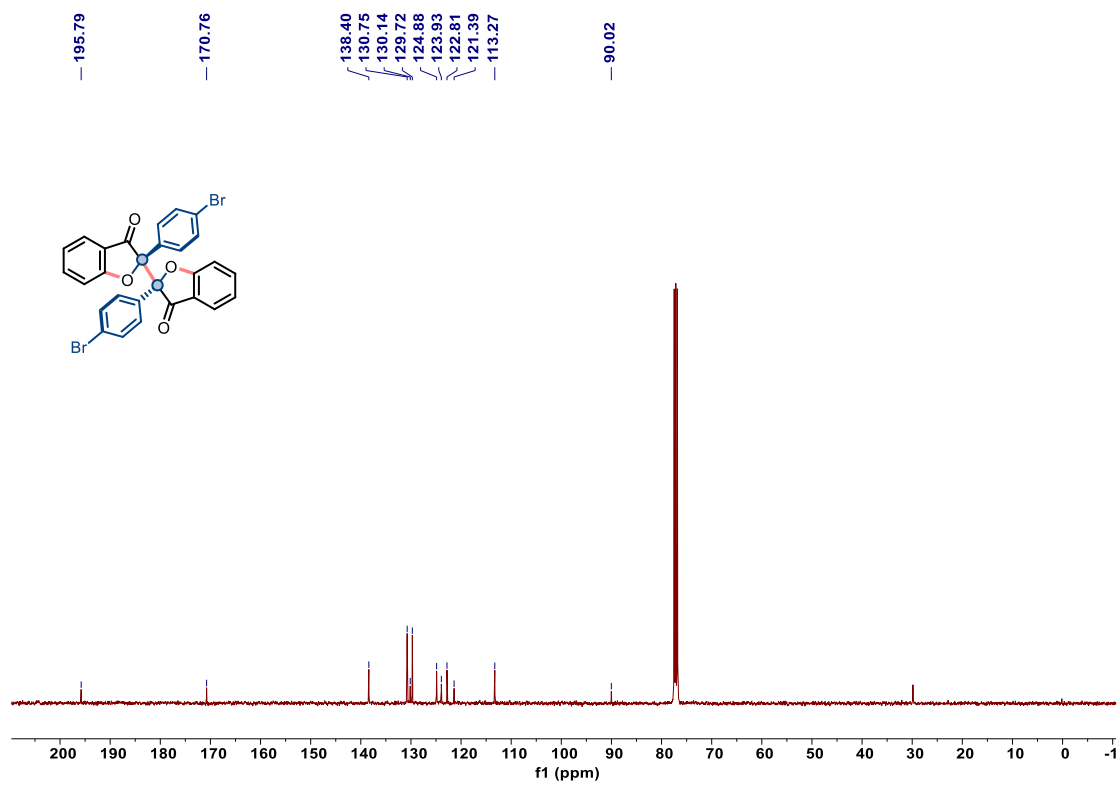

$^1\text{H}$  NMR (600 MHz,  $\text{CDCl}_3$ ) spectra of compound **2j-1**

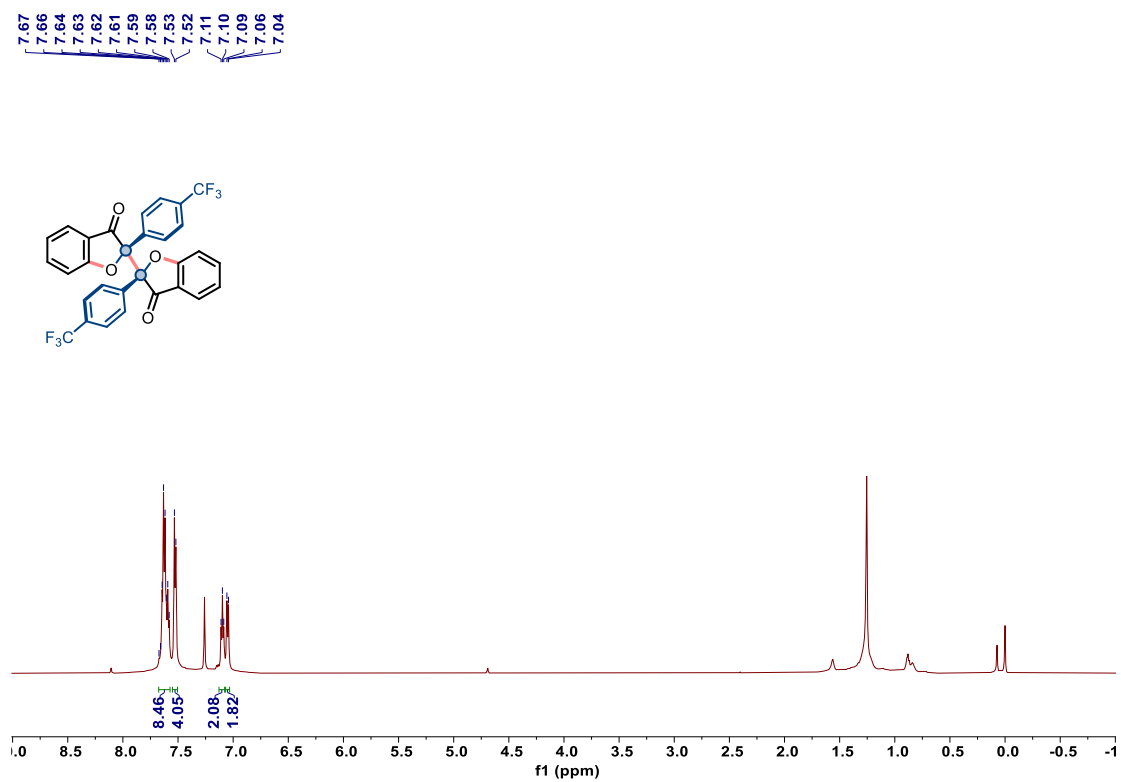

$^{13}\text{C}$  NMR (151 MHz,  $\text{CDCl}_3$ ) spectra of compound **2j-1**

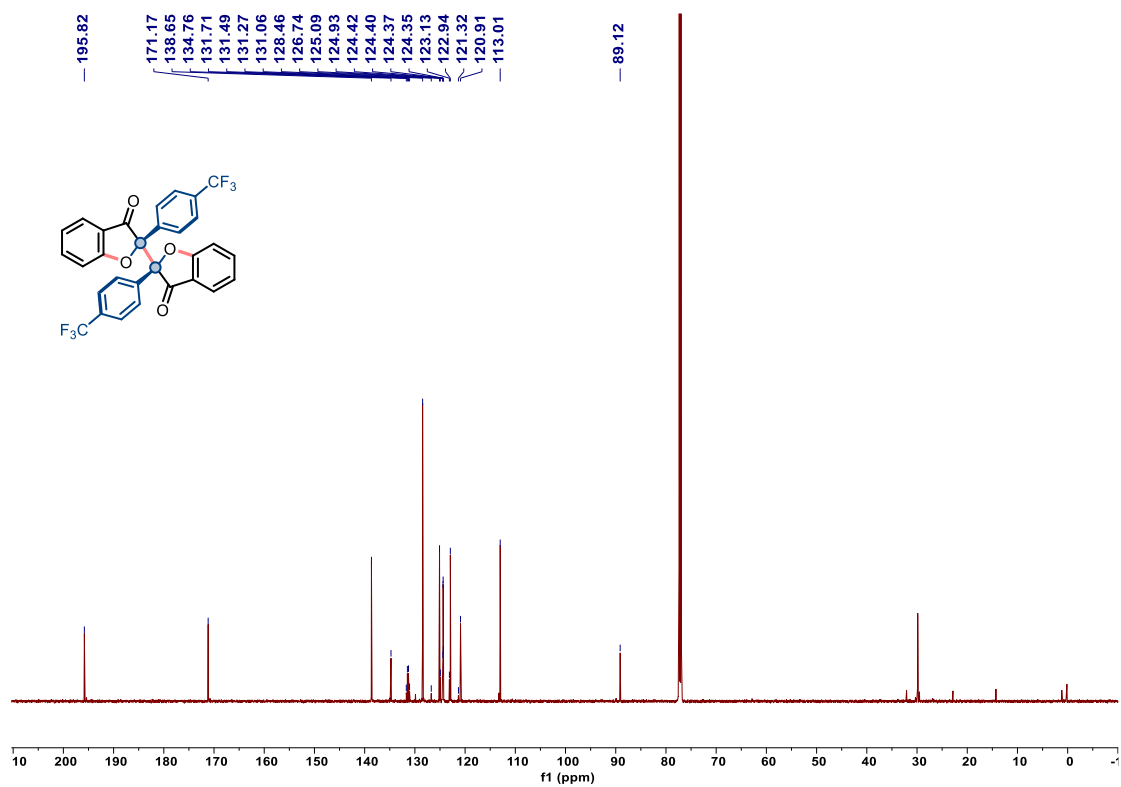

$^{19}\text{F}$  NMR (565 MHz,  $\text{CDCl}_3$ ) spectra of compound **2j-1**

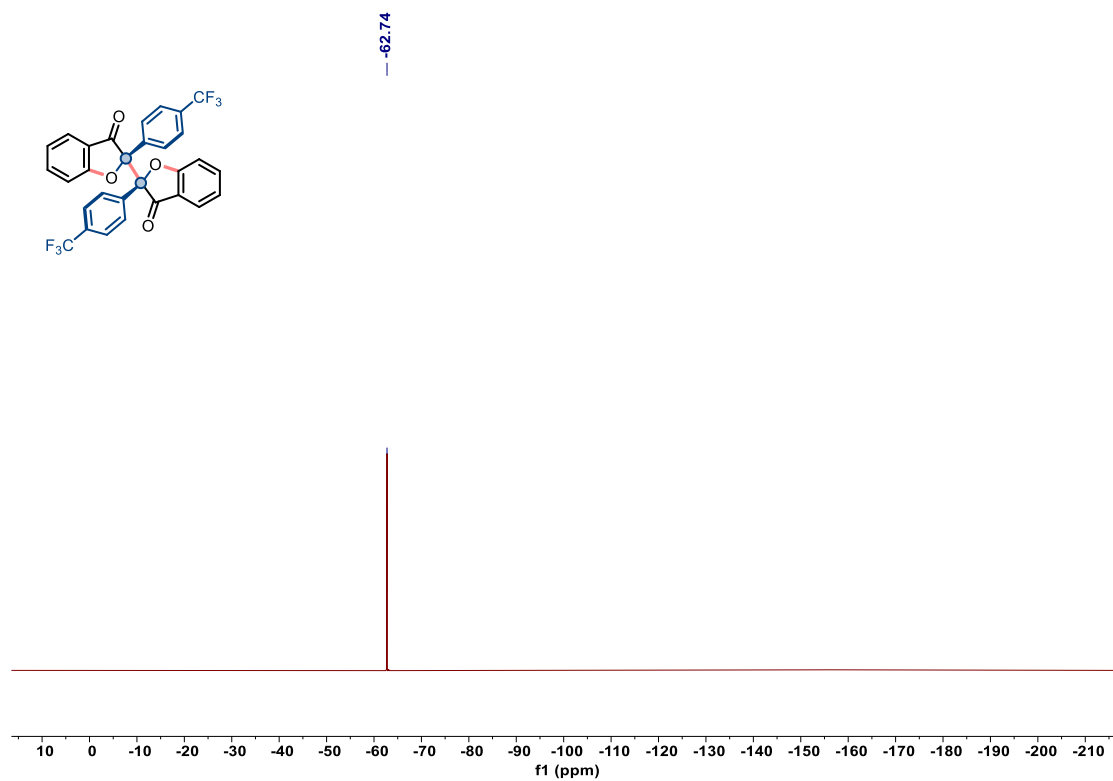

$^1\text{H}$  NMR (600 MHz,  $\text{CDCl}_3$ ) spectra of compound **2j-2**

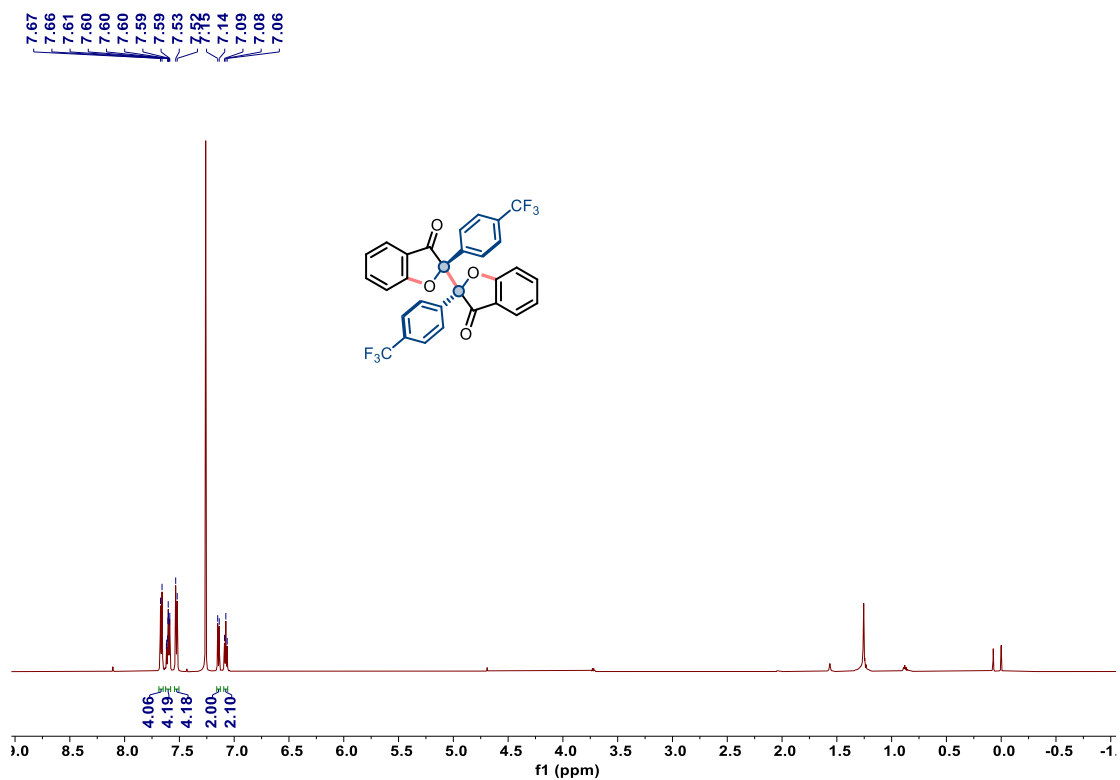

$^{13}\text{C}$  NMR (151 MHz,  $\text{CDCl}_3$ ) spectra of compound **2j-2**

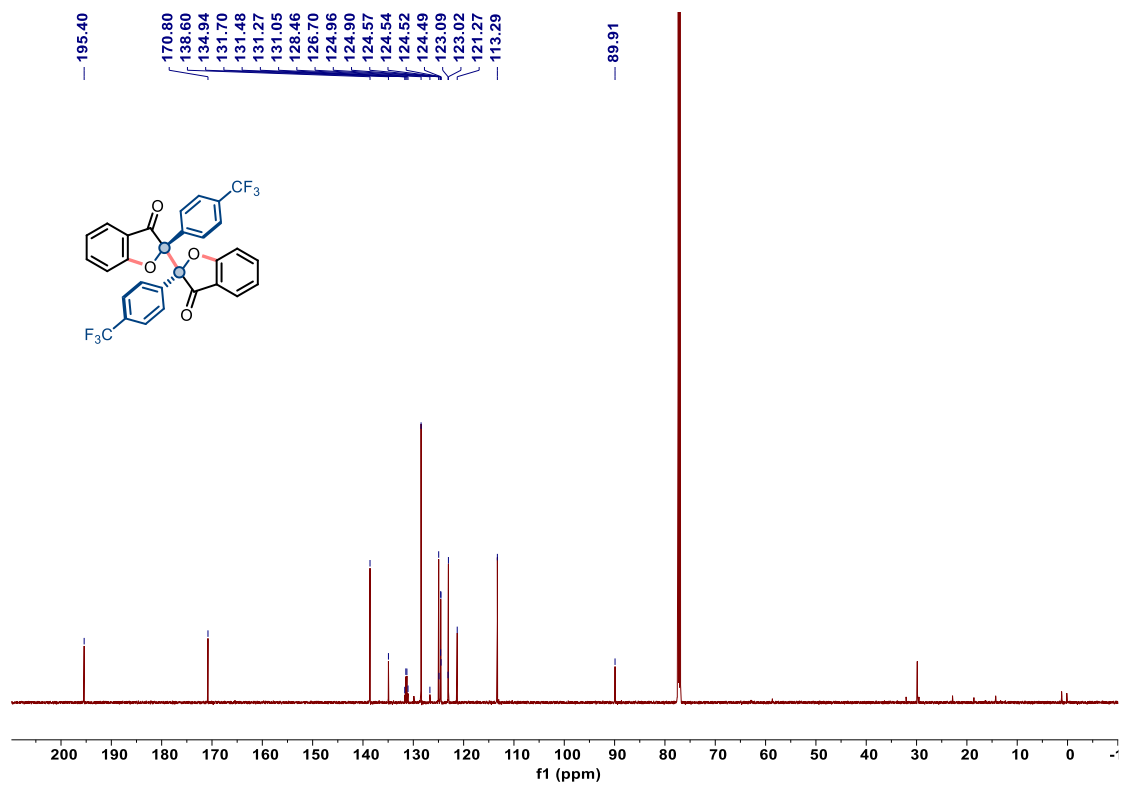

$^{19}\text{F}$  NMR (565 MHz,  $\text{CDCl}_3$ ) spectra of compound **2j-2**

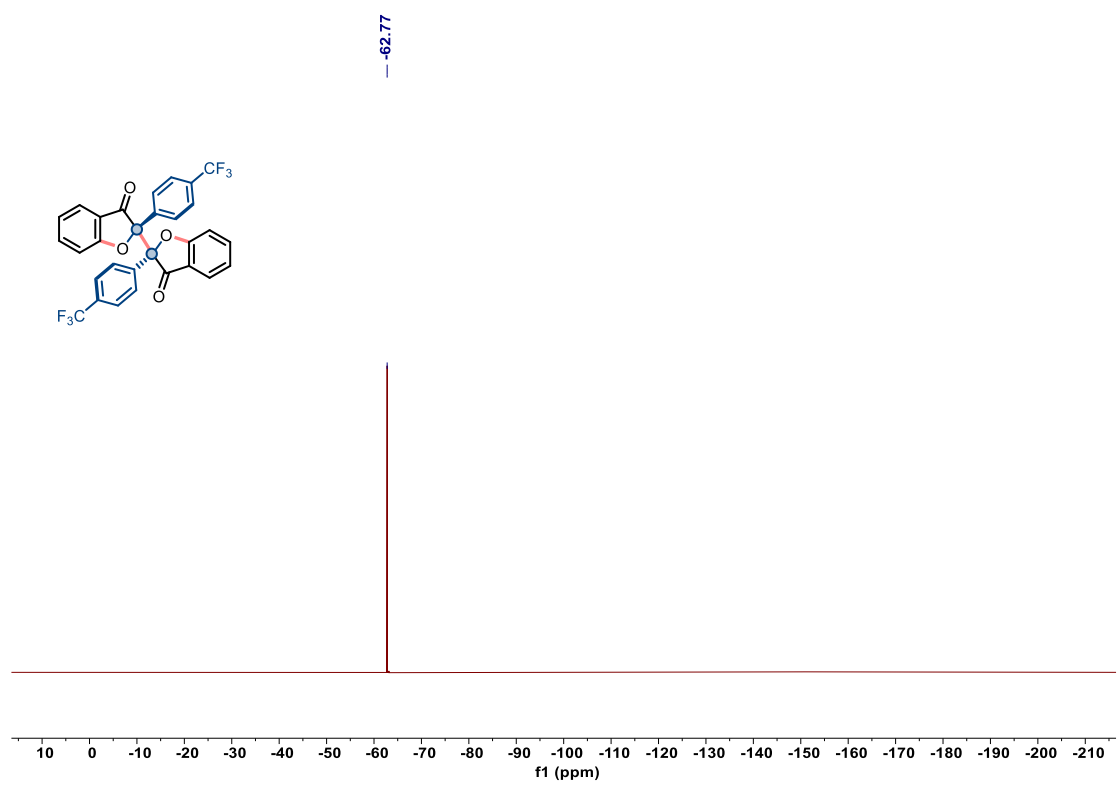

$^1\text{H}$  NMR (400 MHz,  $\text{CDCl}_3$ ) spectra of compound **2k**

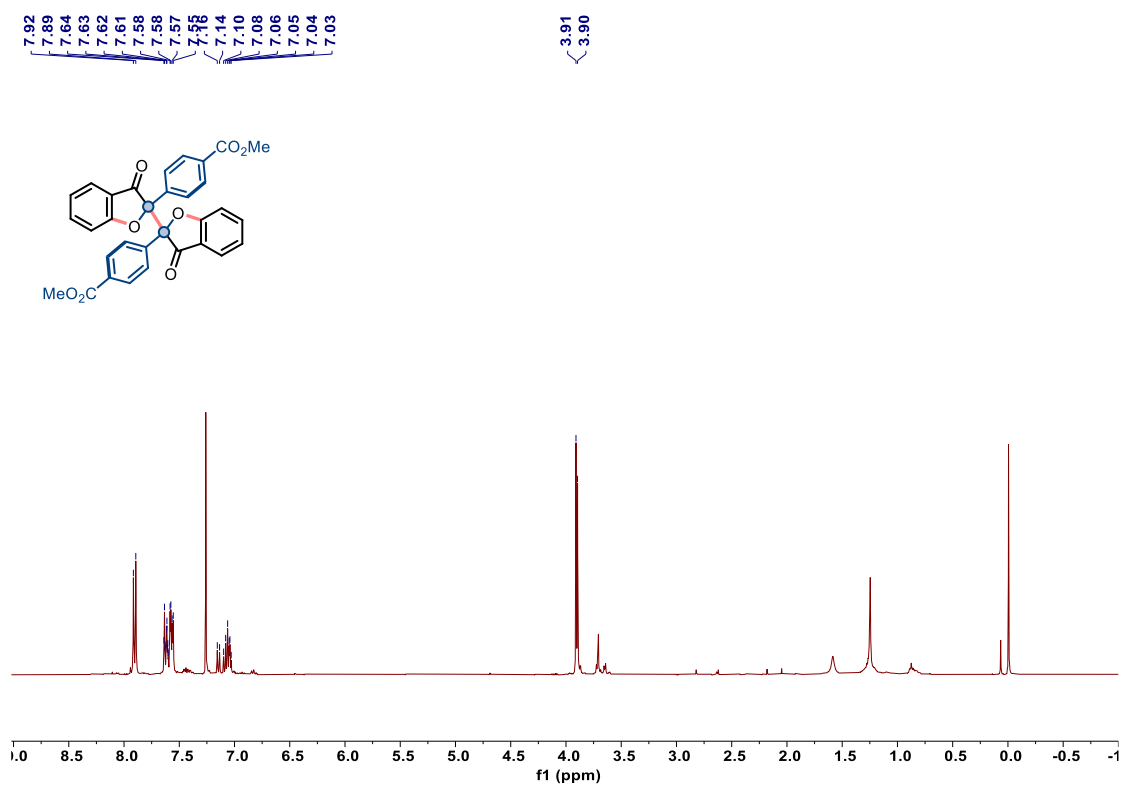

$^{13}\text{C}$  NMR (101 MHz,  $\text{CDCl}_3$ ) spectra of compound **2k**

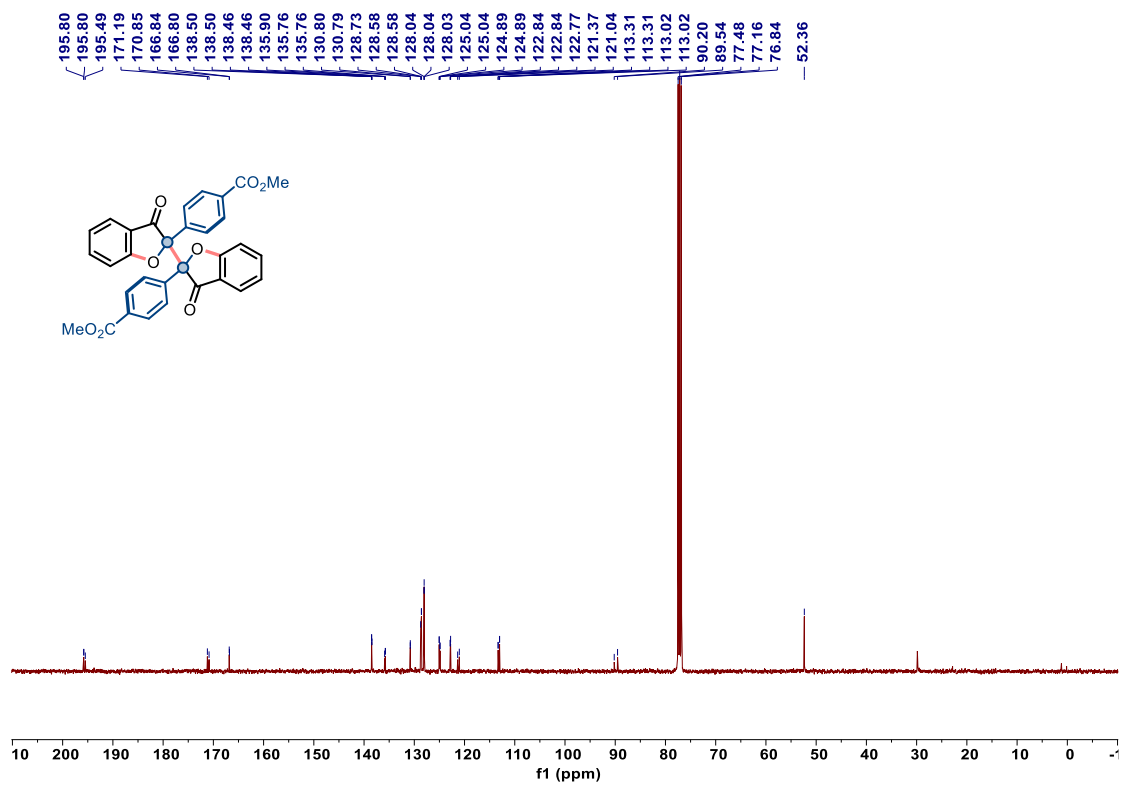

$^1\text{H}$  NMR (400 MHz,  $\text{CDCl}_3$ ) spectra of compound **2l**

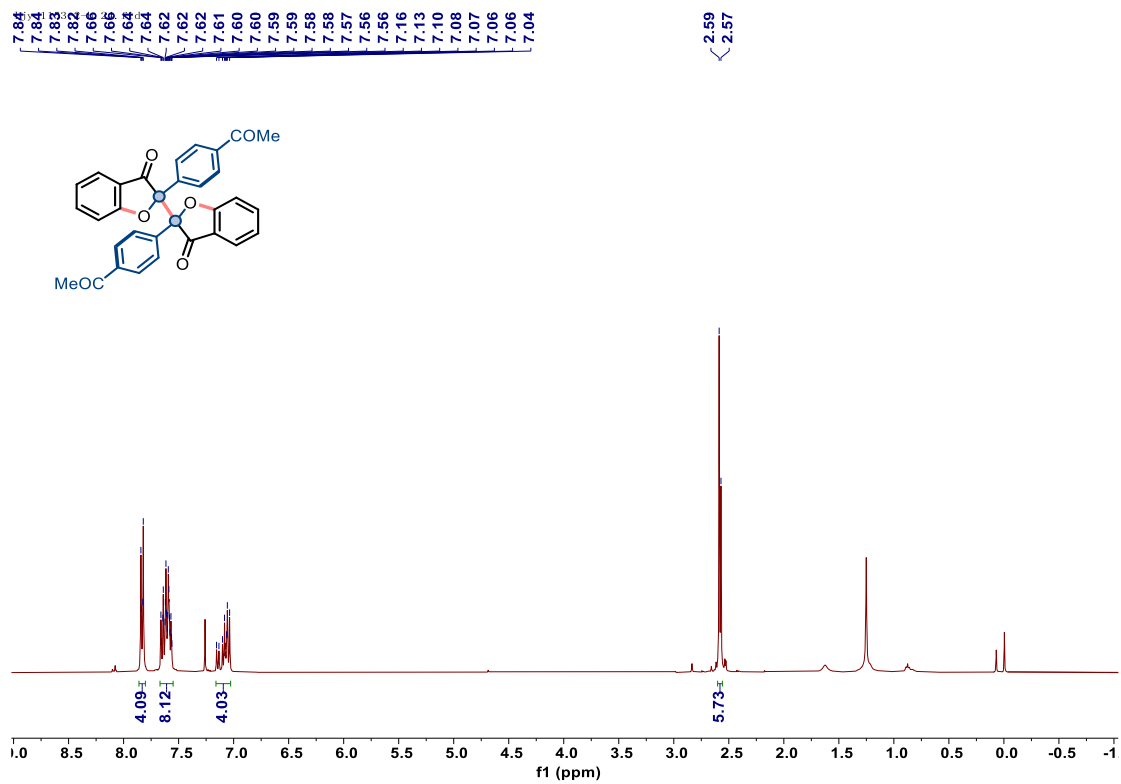

$^{13}\text{C}$  NMR (101 MHz,  $\text{CDCl}_3$ ) spectra of compound **2l**

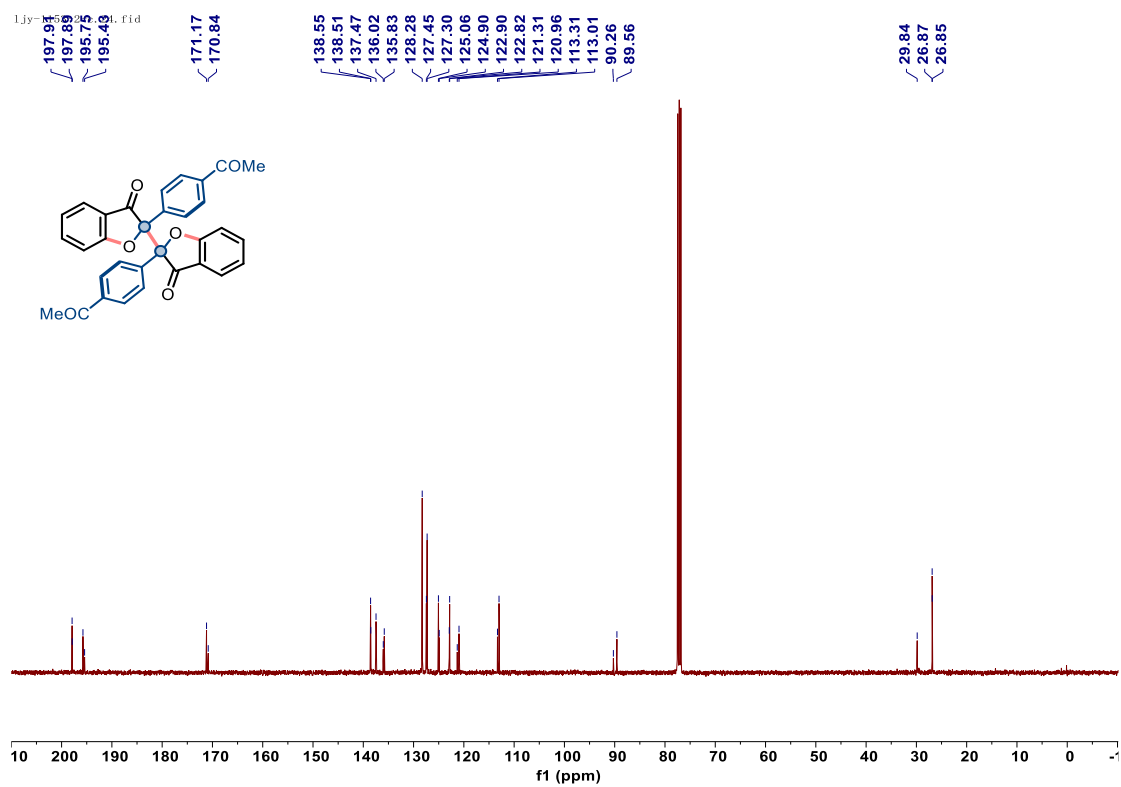

$^1\text{H}$  NMR (600 MHz,  $\text{CDCl}_3$ ) spectra of compound **2m-1**

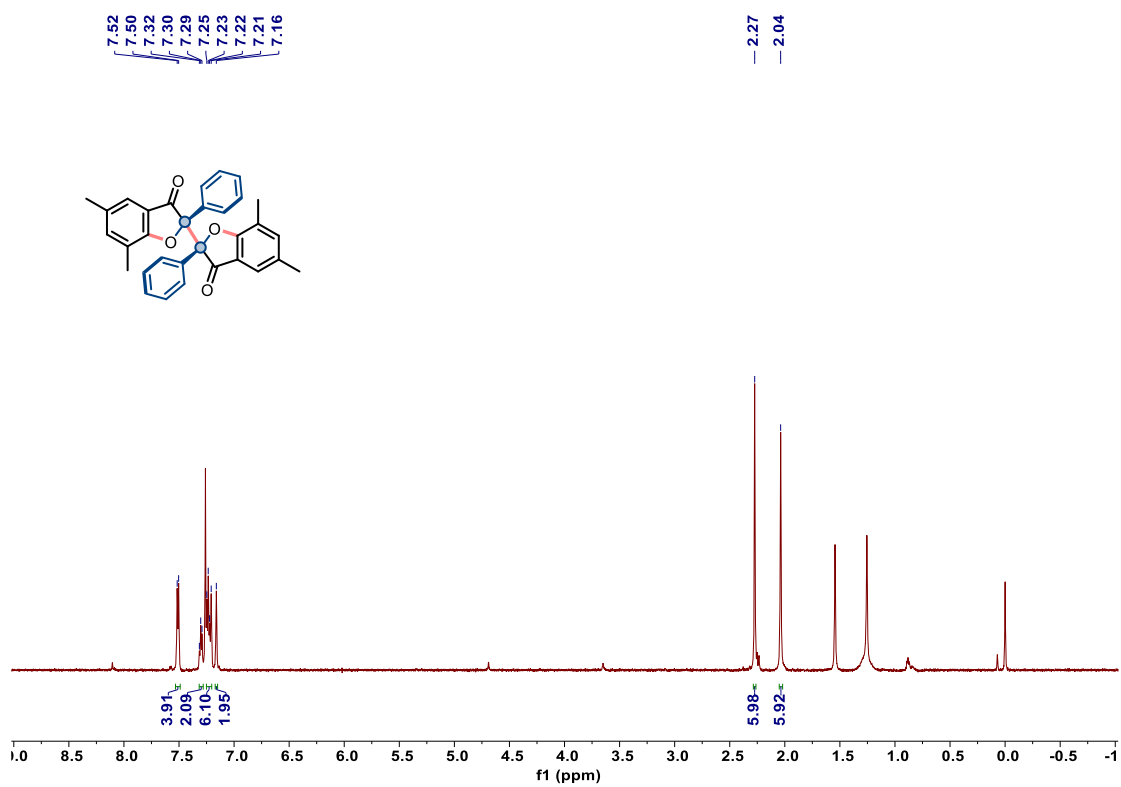



$^{13}\text{C}$  NMR (151 MHz,  $\text{CDCl}_3$ ) spectra of compound **2m-2**

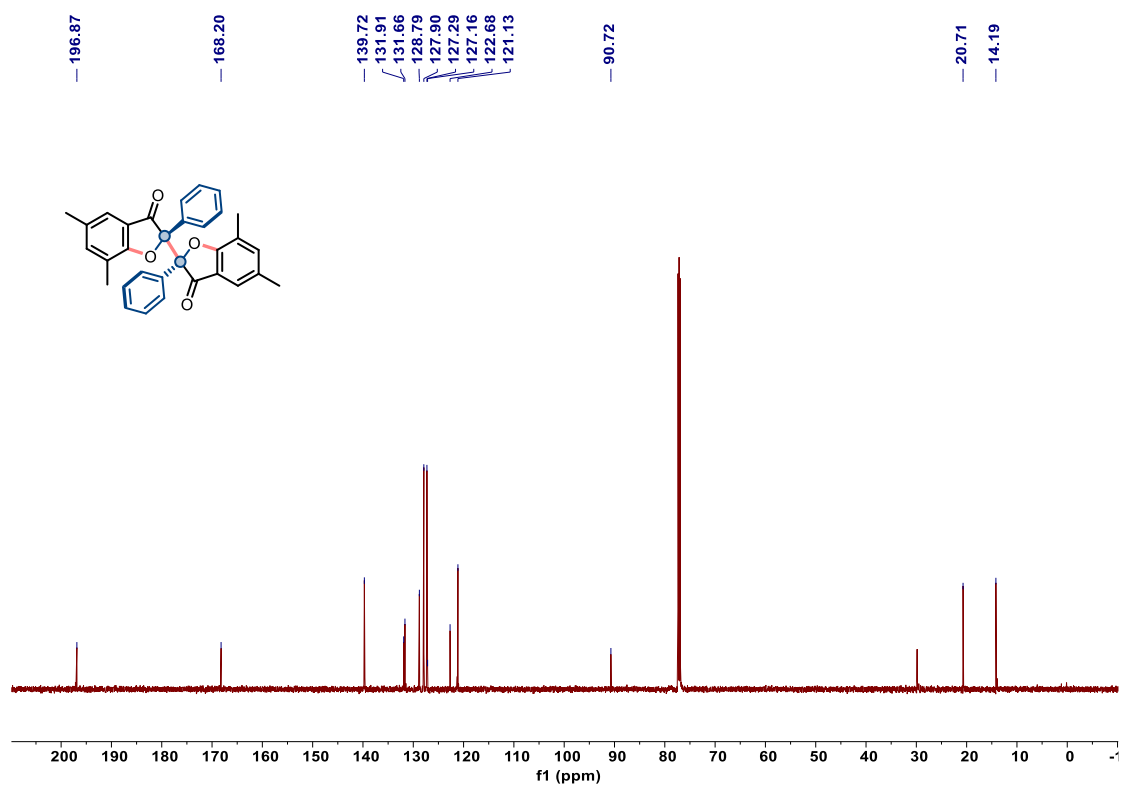

$^1\text{H}$  NMR (400 MHz,  $\text{CDCl}_3$ ) spectra of compound **2n-1**

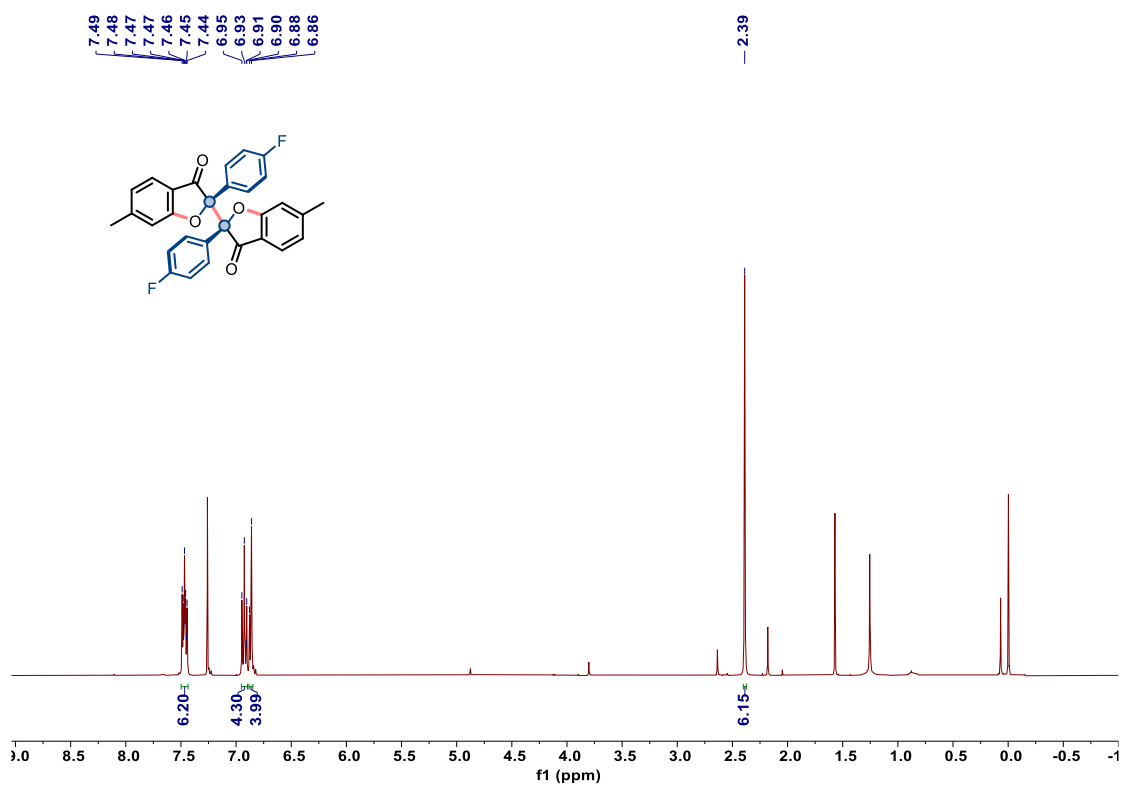



$^{13}\text{C}$  NMR (101 MHz,  $\text{CDCl}_3$ ) spectra of compound **2n-1**

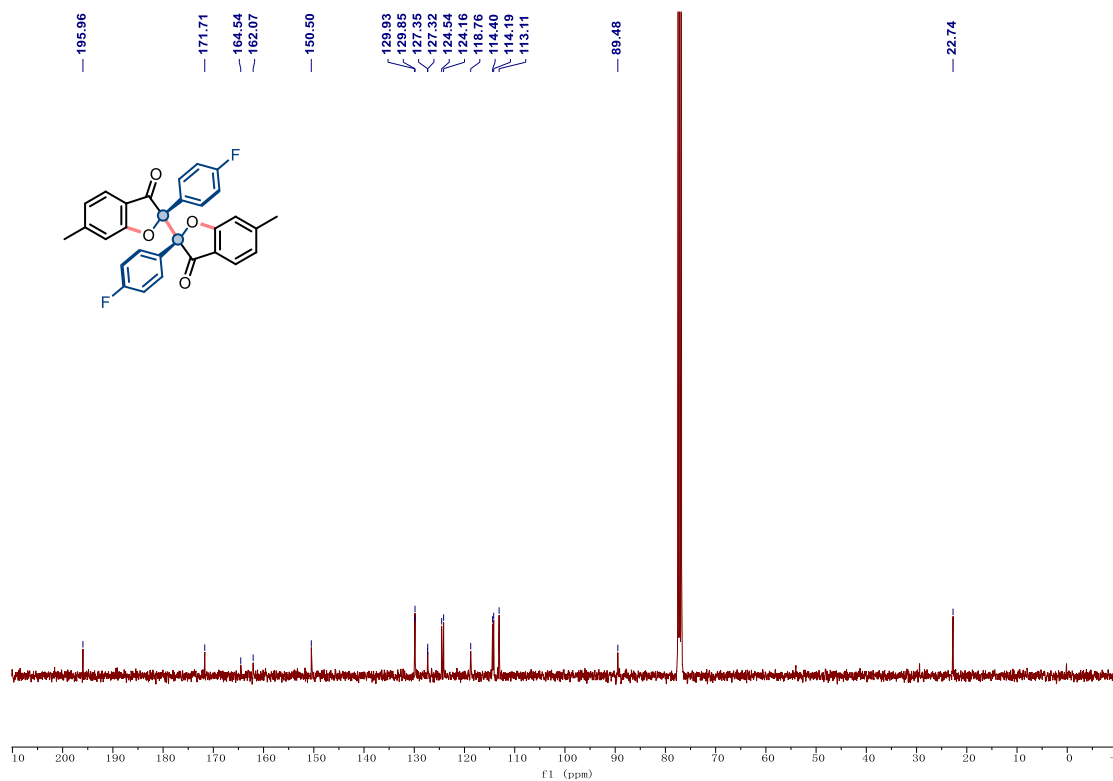

$^{19}\text{F}$  NMR (376 MHz,  $\text{CDCl}_3$ ) spectra of compound **2n-1**

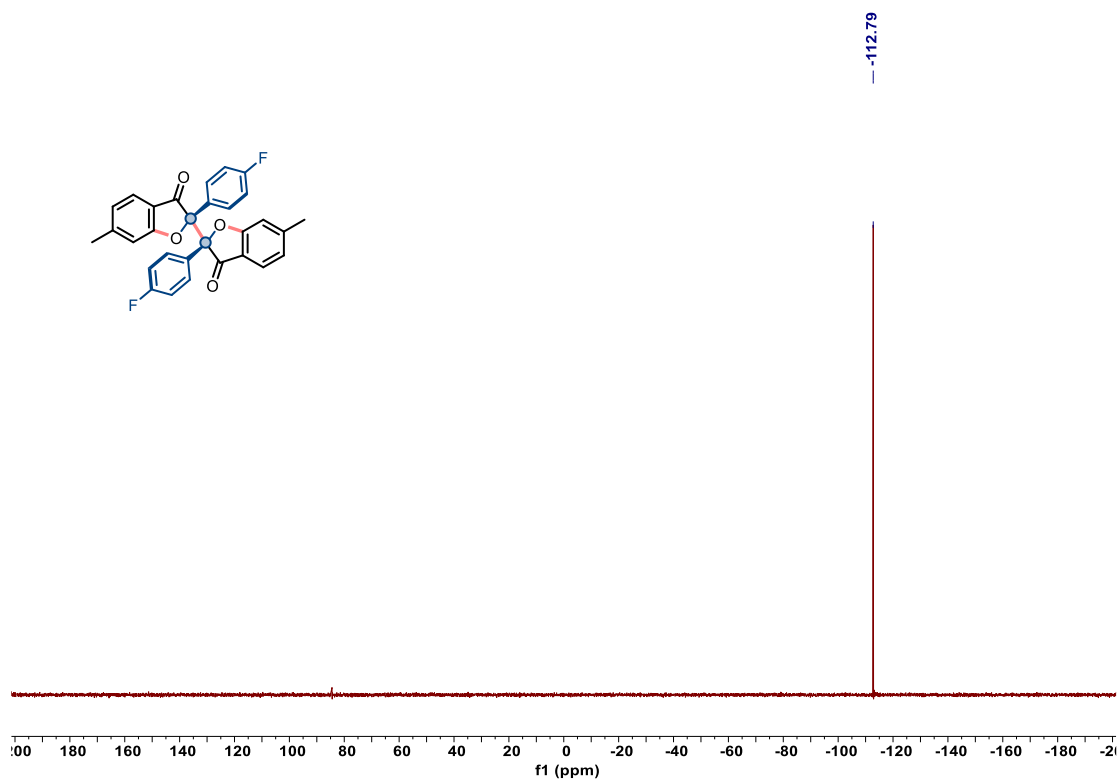

$^1\text{H}$  NMR (400 MHz,  $\text{CDCl}_3$ ) spectra of compound **2n-2**

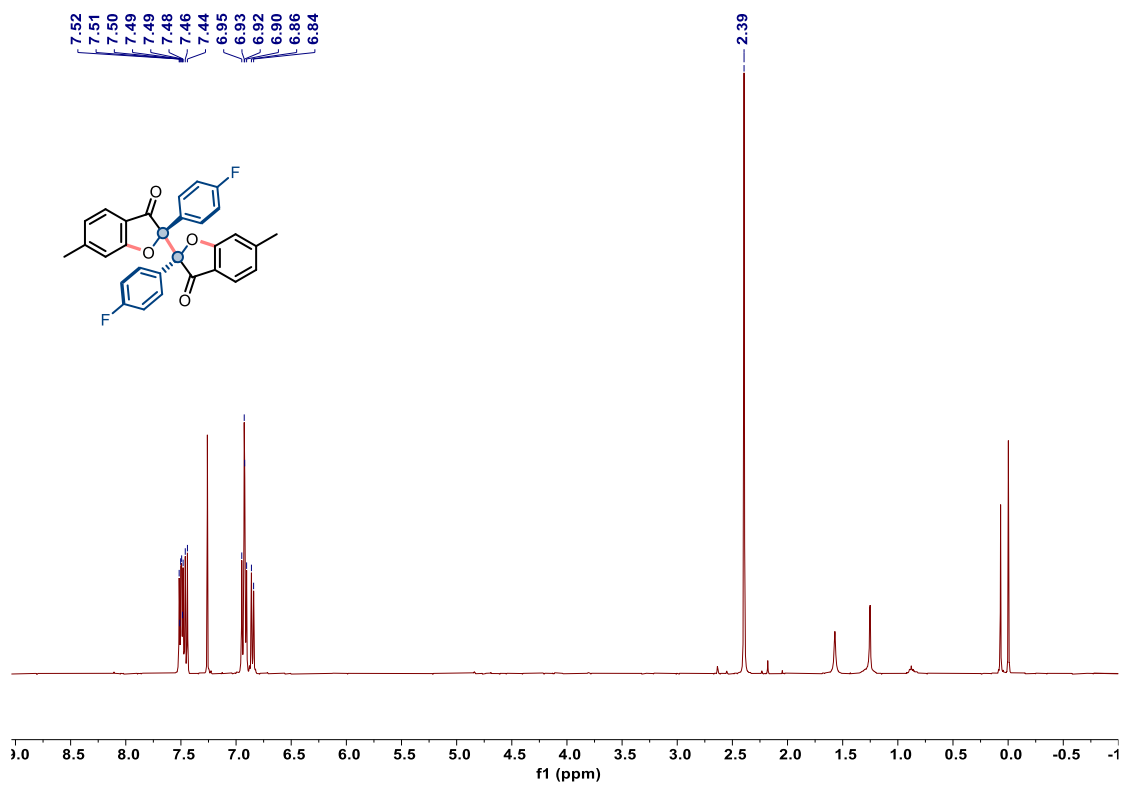

$^{13}\text{C}$  NMR (101 MHz,  $\text{CDCl}_3$ ) spectra of compound **2n-2**

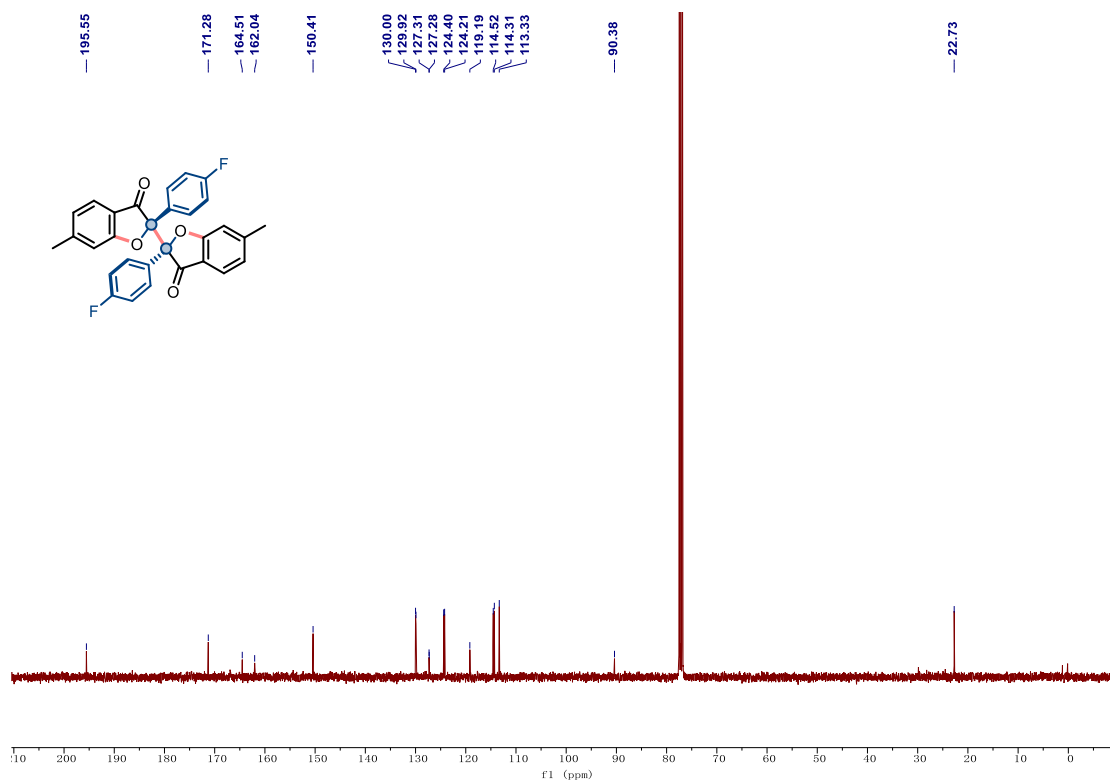

$^{19}\text{F}$  NMR (376 MHz,  $\text{CDCl}_3$ ) spectra of compound **2n-2**

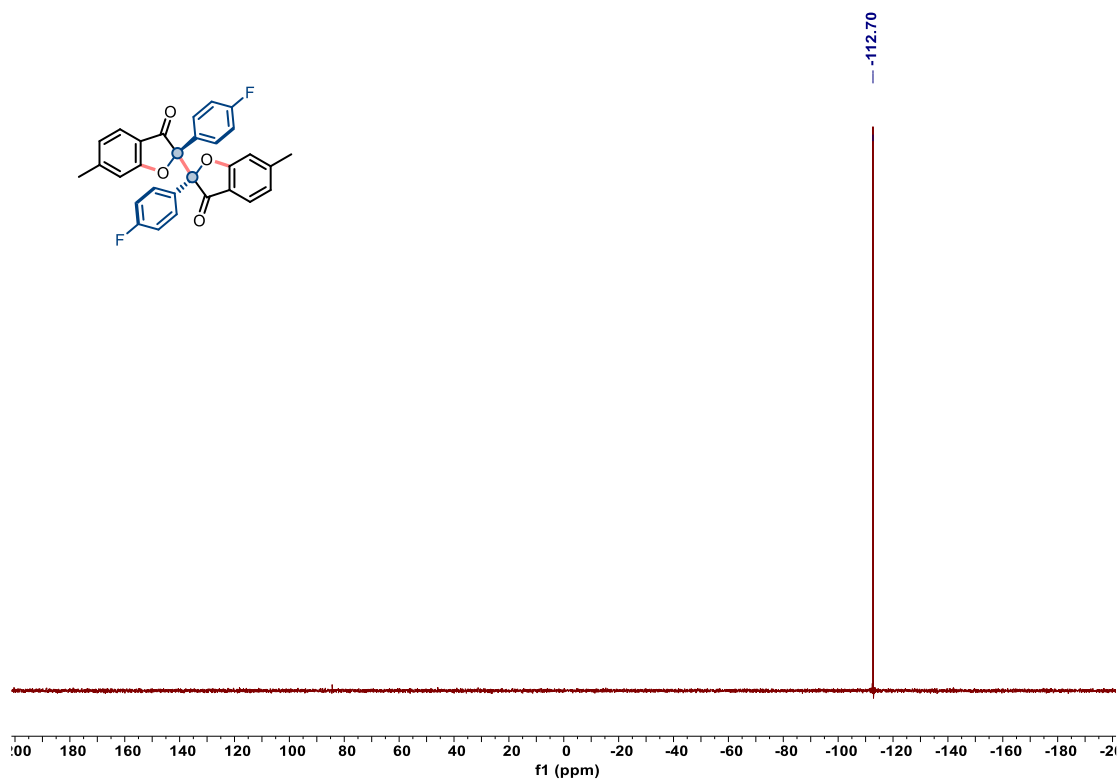

$^1\text{H}$  NMR (400 MHz,  $\text{CDCl}_3$ ) spectra of compound **2o**

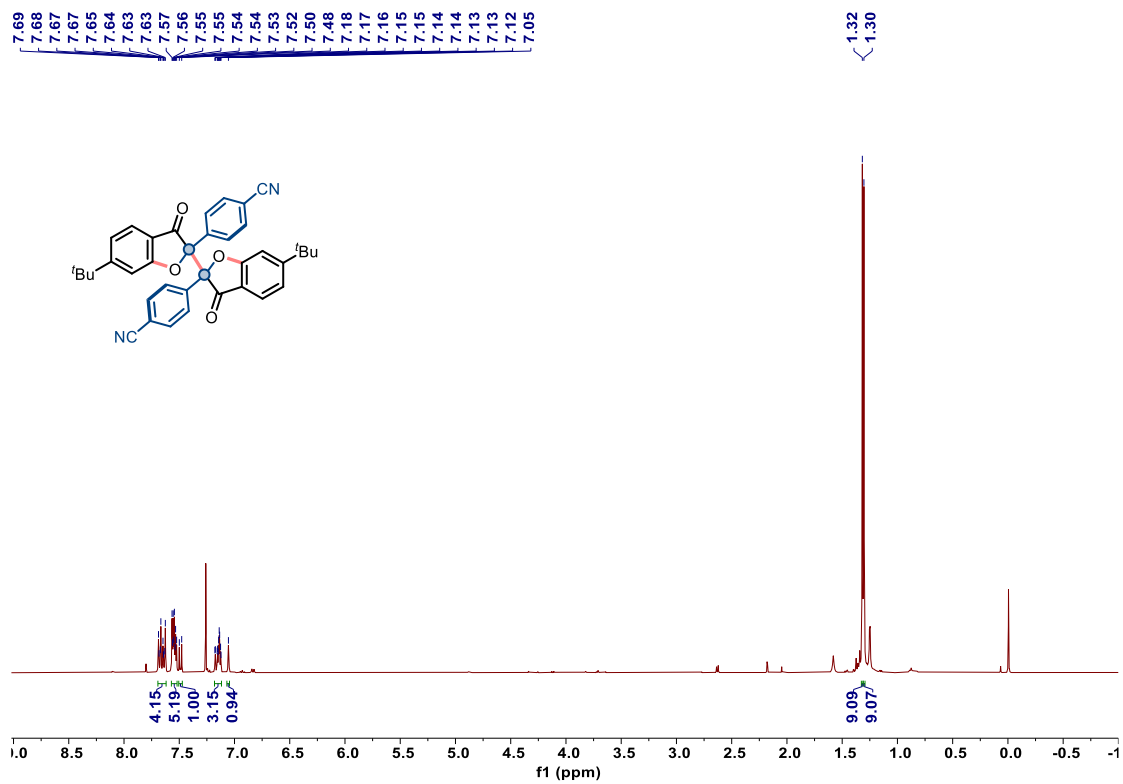

$^{13}\text{C}$  NMR (101 MHz,  $\text{CDCl}_3$ ) spectra of compound **2o**

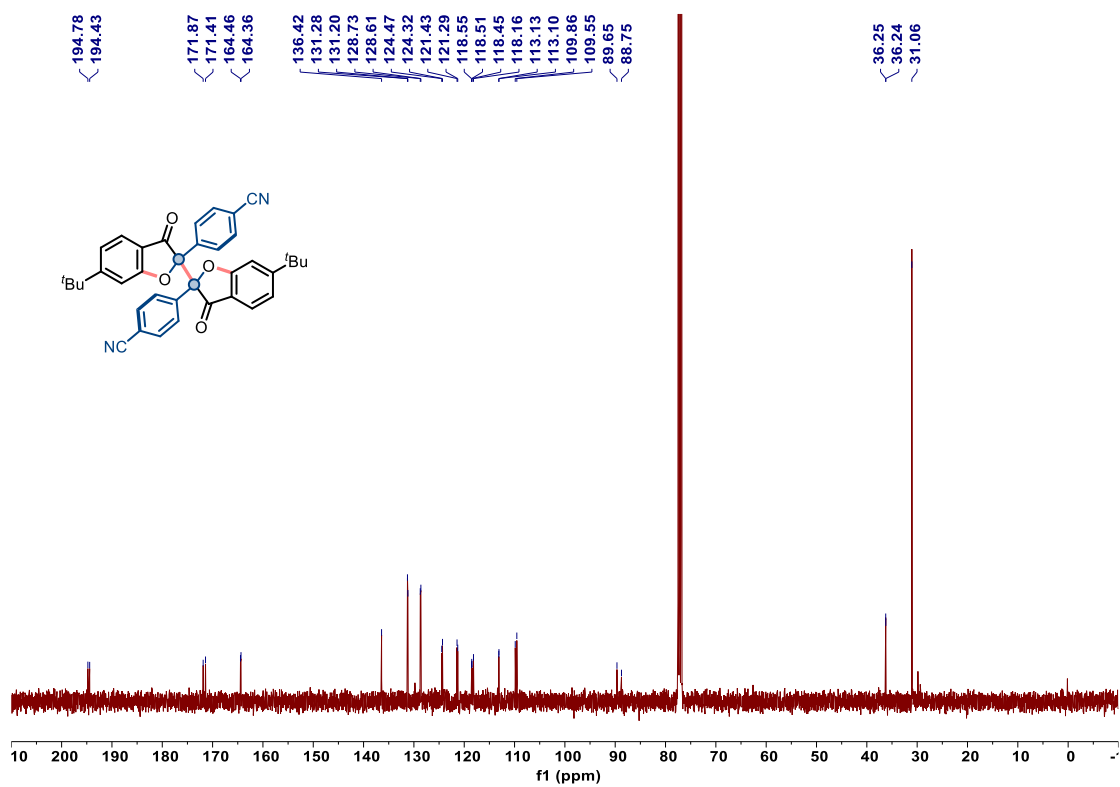

$^1\text{H}$  NMR (400 MHz,  $\text{CDCl}_3$ ) spectra of compound **2p-1**

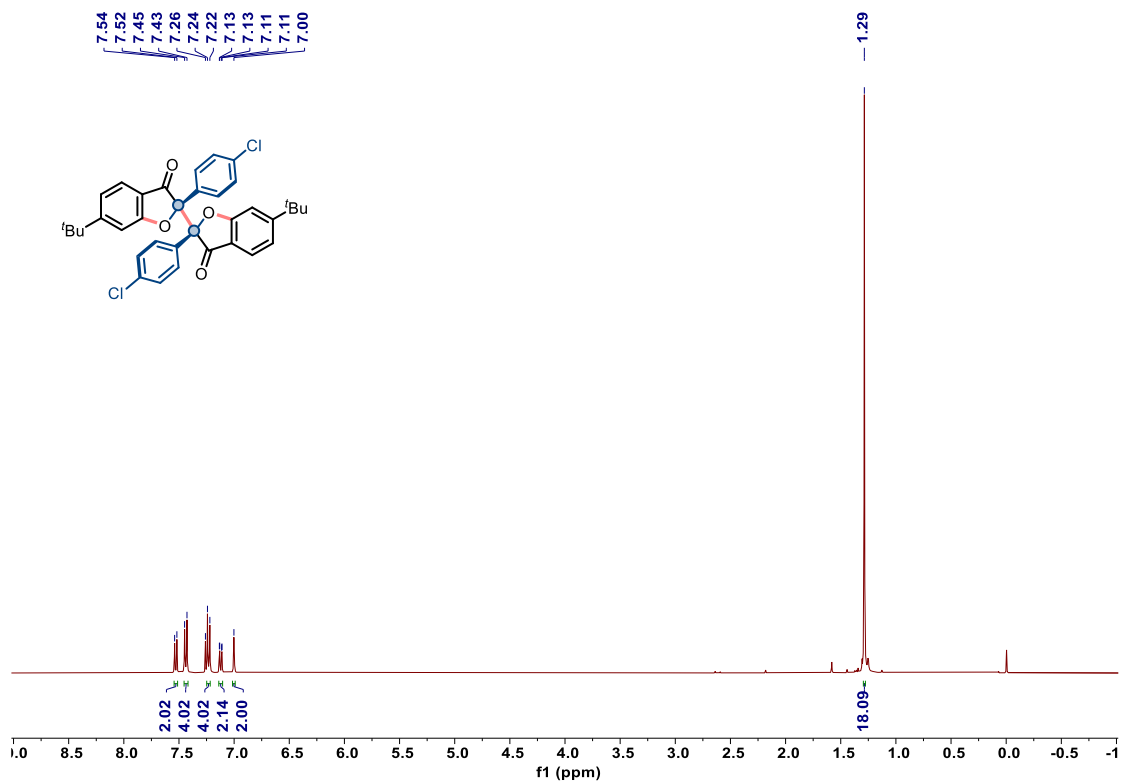

$^{13}\text{C}$  NMR (101 MHz,  $\text{CDCl}_3$ ) spectra of compound **2p-1**

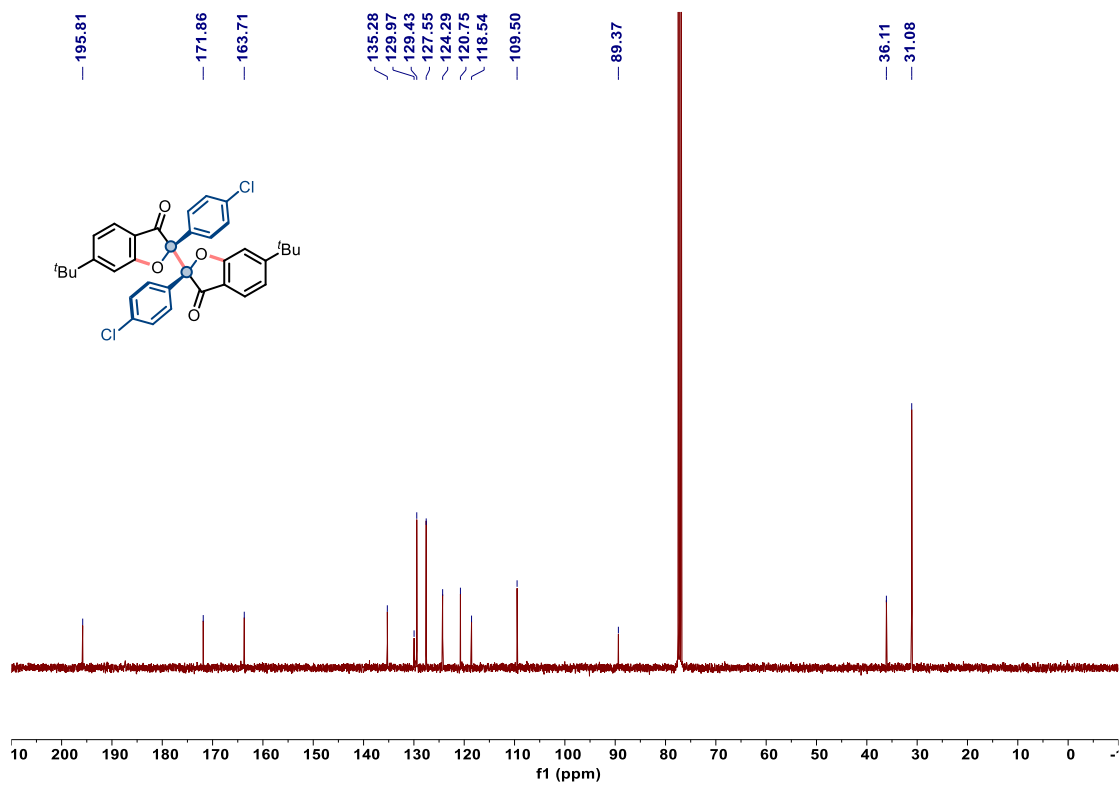

$^1\text{H}$  NMR (400 MHz,  $\text{CDCl}_3$ ) spectra of compound **2p-2**

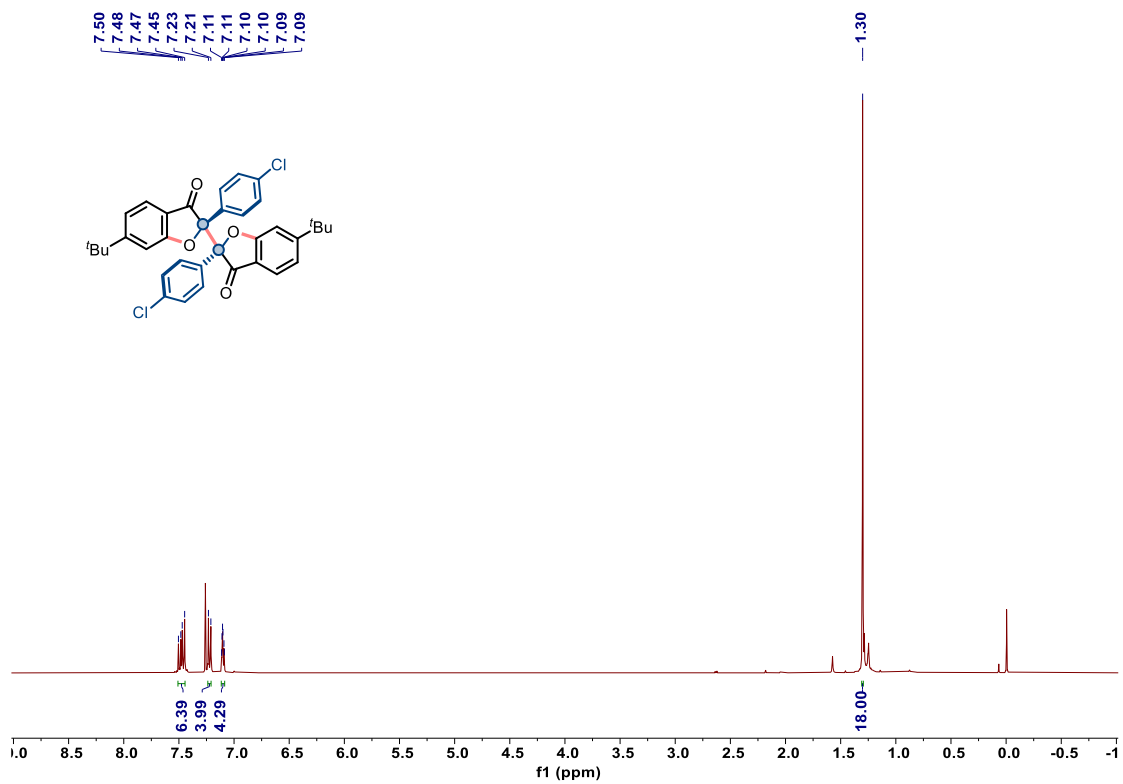

$^{13}\text{C}$  NMR (101 MHz,  $\text{CDCl}_3$ ) spectra of compound **2p-2**

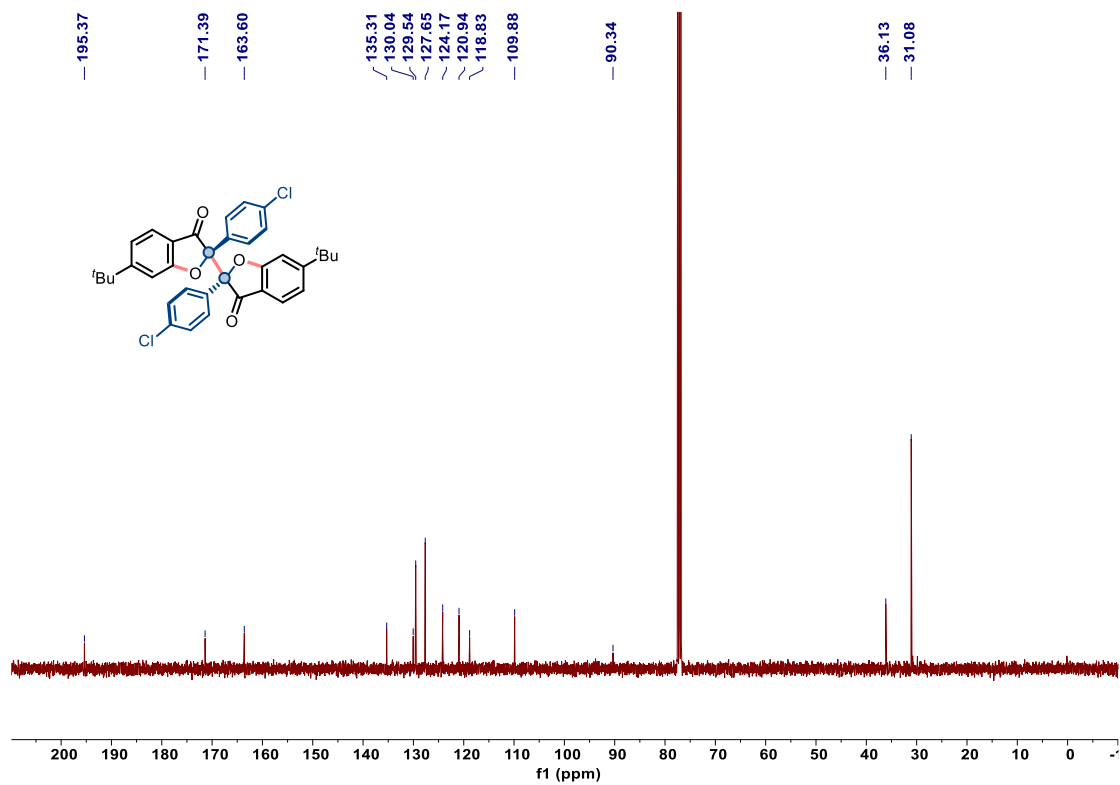

$^1\text{H}$  NMR (400 MHz,  $\text{CDCl}_3$ ) spectra of compound **2s-1**

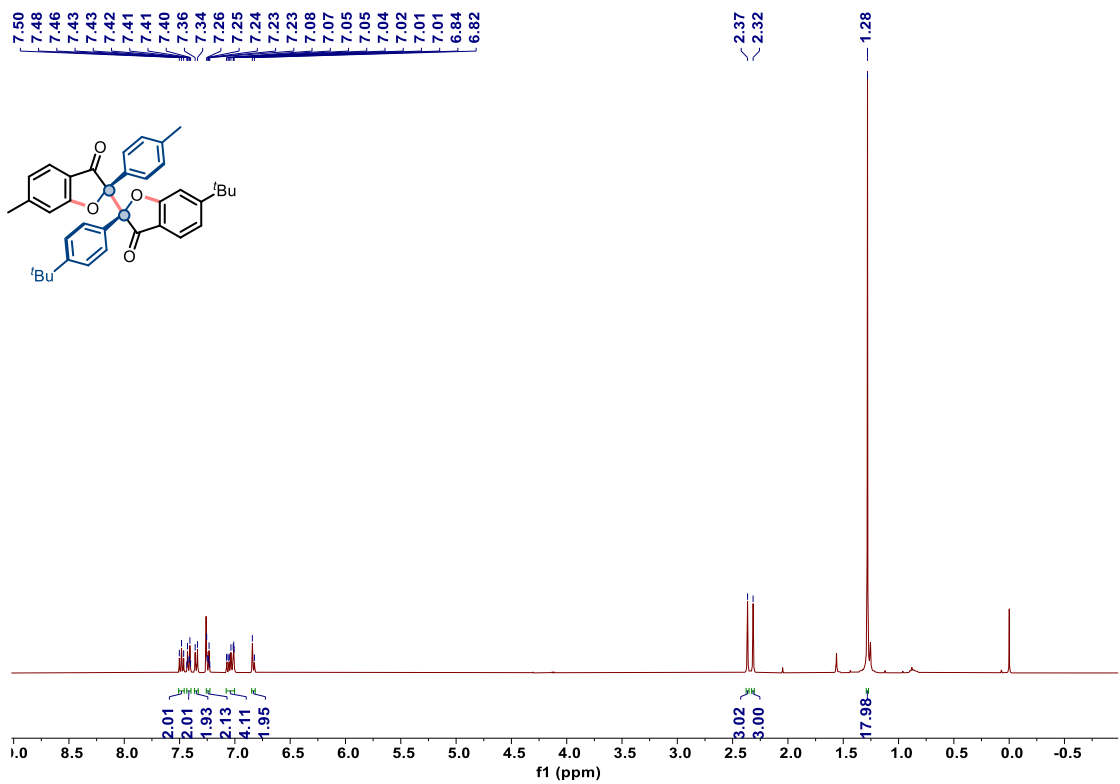

$^{13}\text{C}$  NMR (101 MHz,  $\text{CDCl}_3$ ) spectra of compound **2s-1**

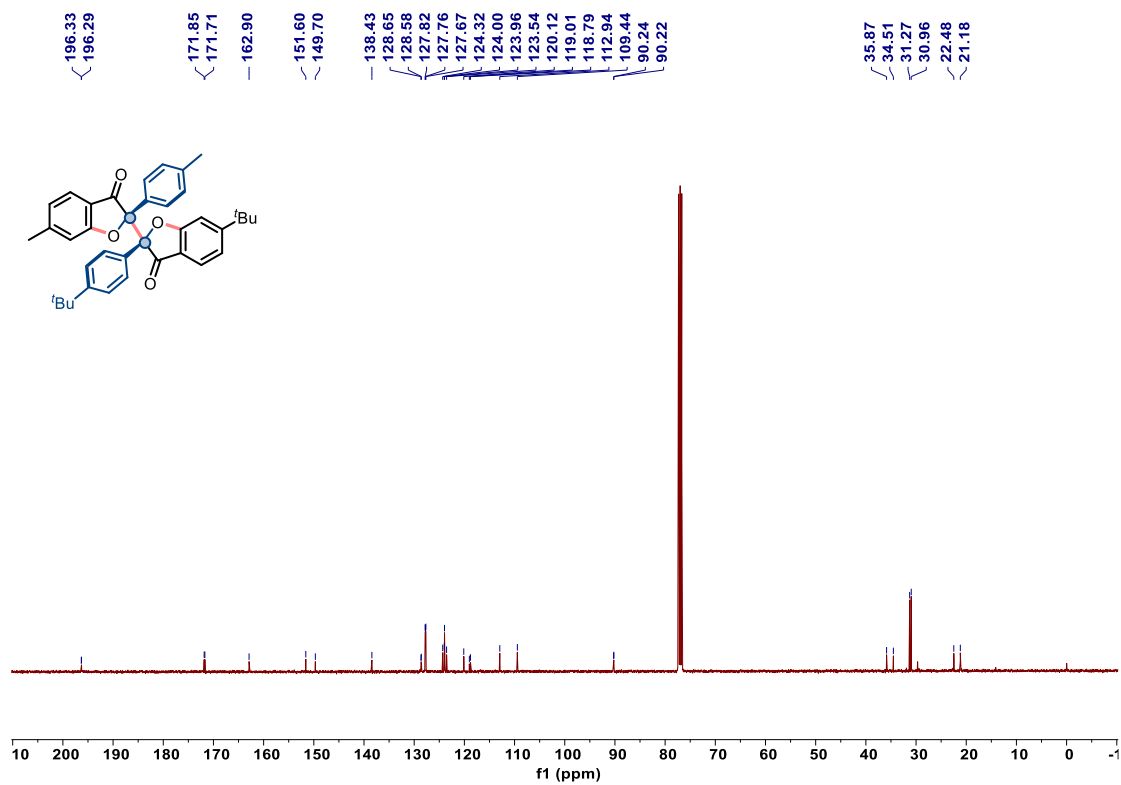

$^1\text{H}$  NMR (400 MHz,  $\text{CDCl}_3$ ) spectra of compound **2s-2**

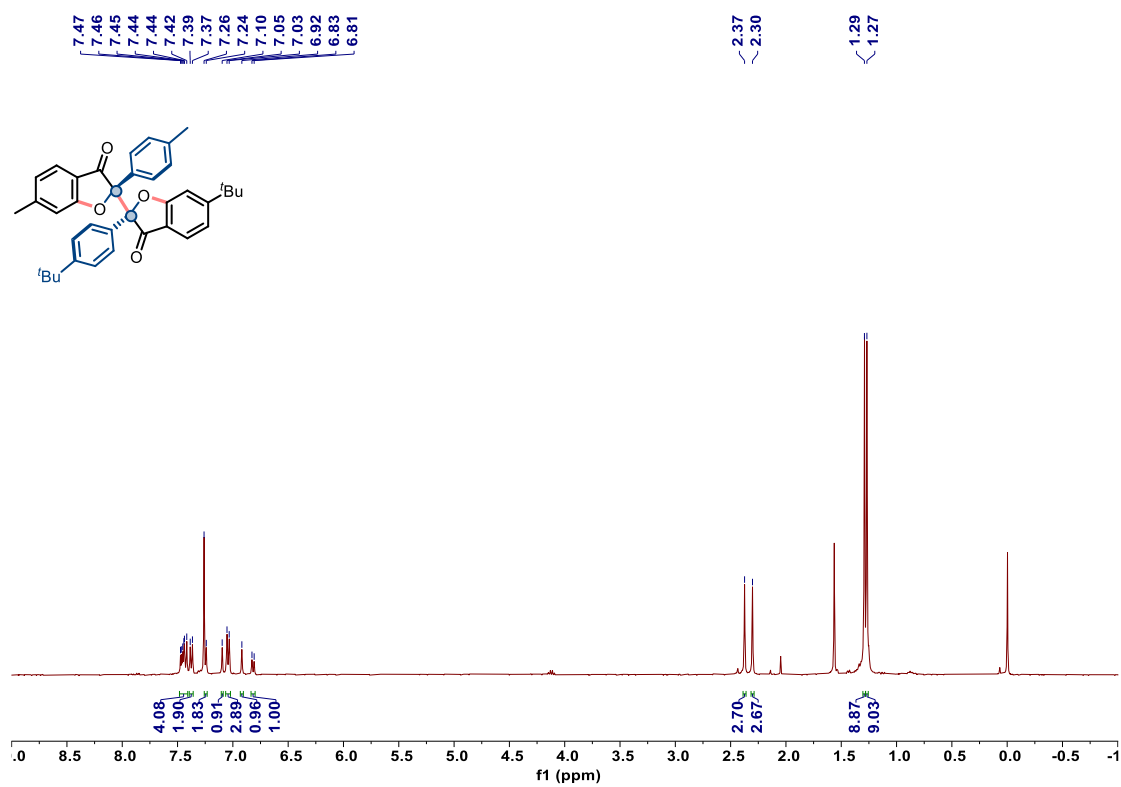

$^{13}\text{C}$  NMR (101 MHz,  $\text{CDCl}_3$ ) spectra of compound **2s-2**

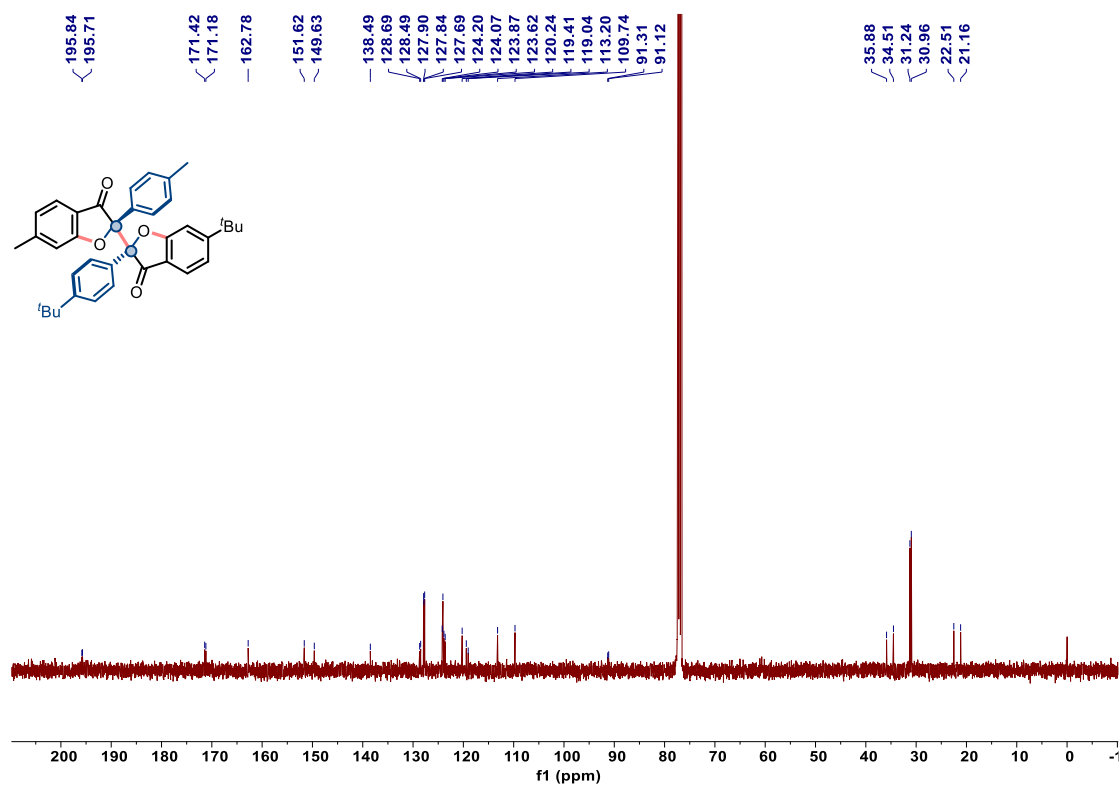

$^1\text{H}$  NMR (400 MHz,  $\text{CDCl}_3$ ) spectra of compound **2t-1**

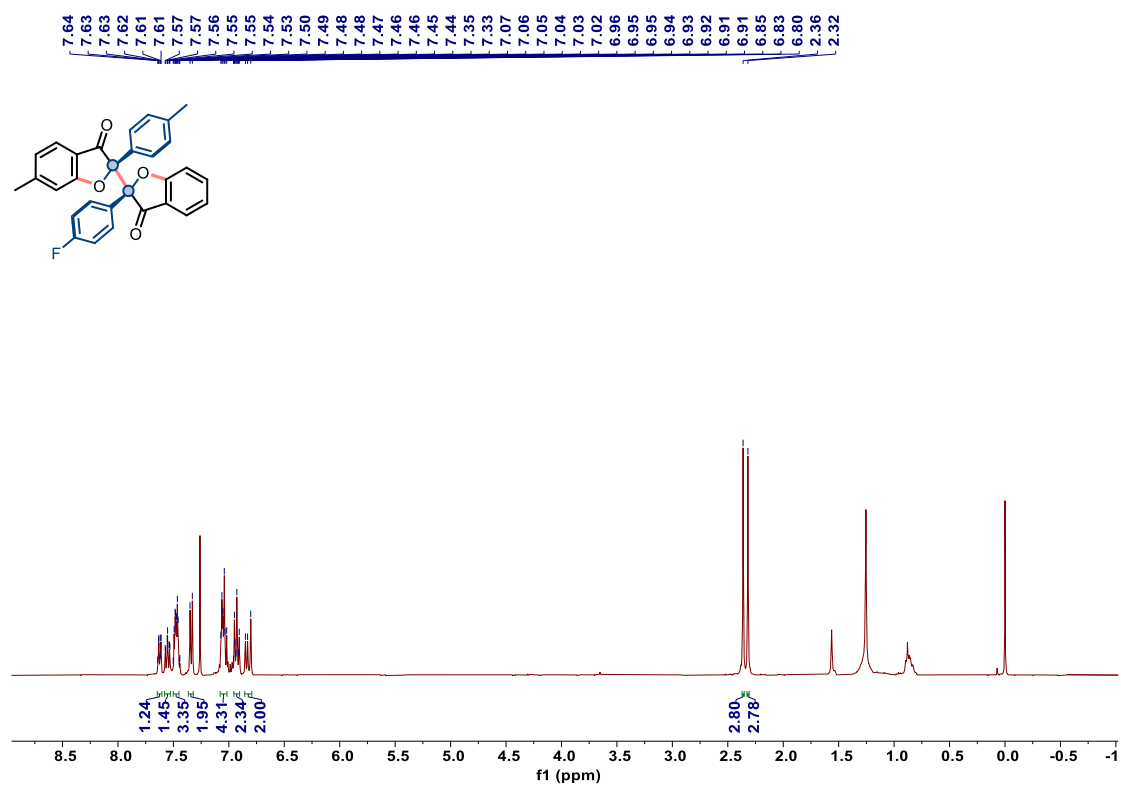



$^{13}\text{C}$  NMR (101 MHz,  $\text{CDCl}_3$ ) spectra of compound **2t-1**

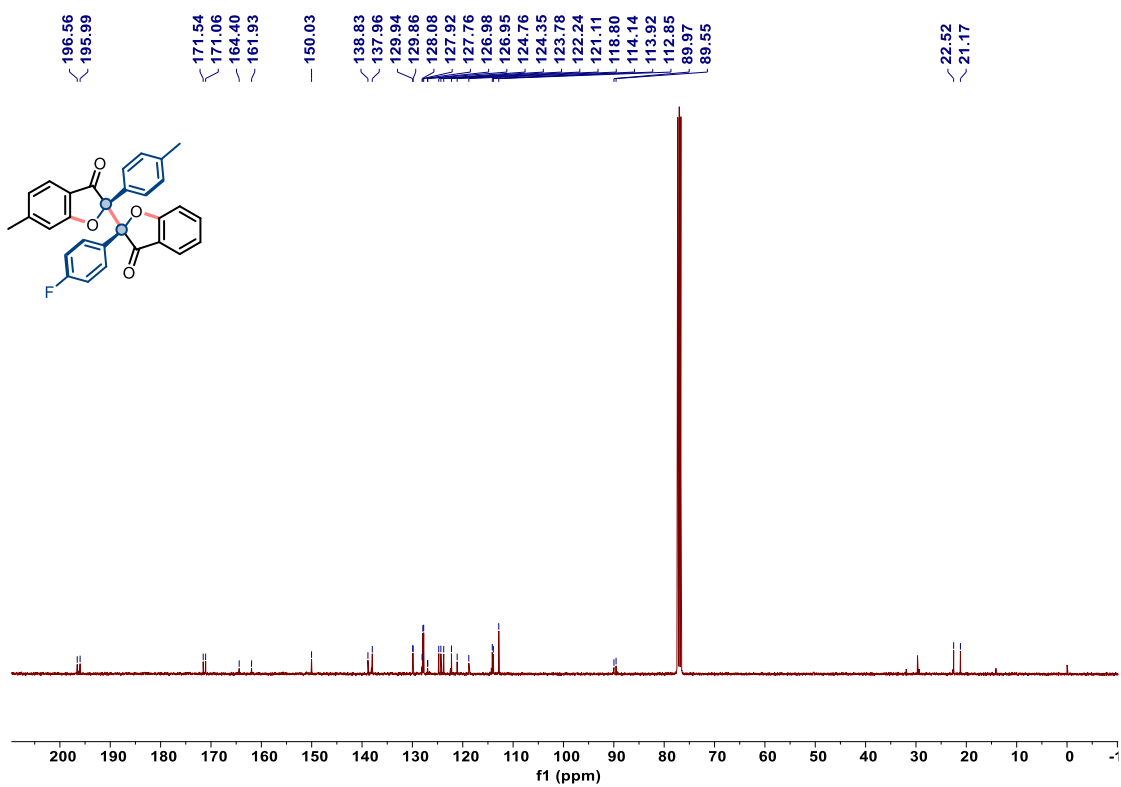

$^{19}\text{F}$  NMR (376 MHz,  $\text{CDCl}_3$ ) spectra of compound **2t-1**

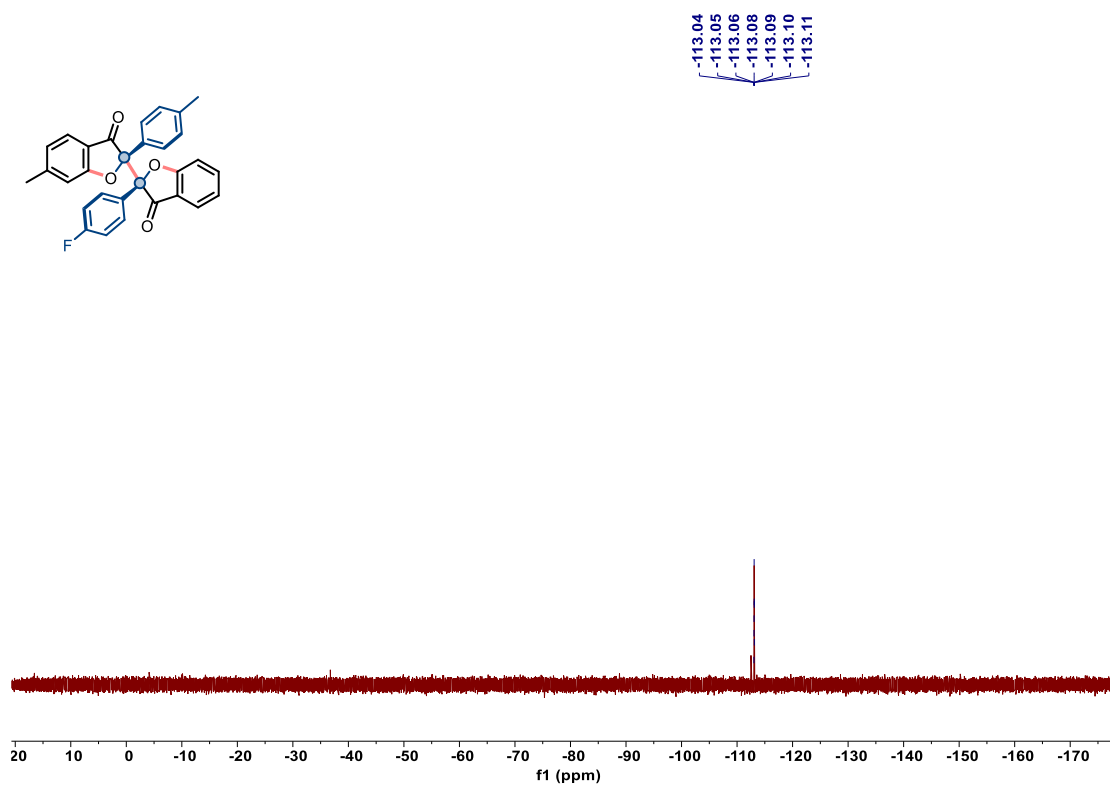

<sup>1</sup>H NMR (400 MHz, CDCl<sub>3</sub>) spectra of compound **2t-2**

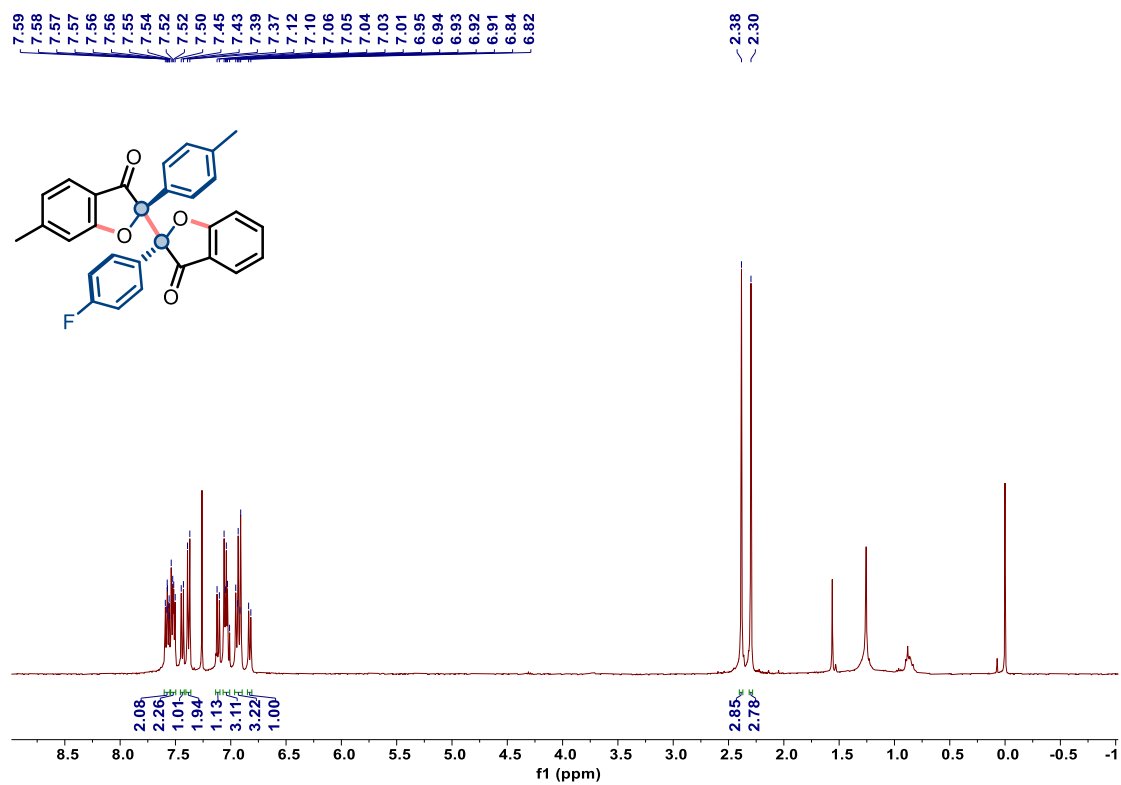

<sup>13</sup>C NMR (101 MHz, CDCl<sub>3</sub>) spectra of compound **2t-2**

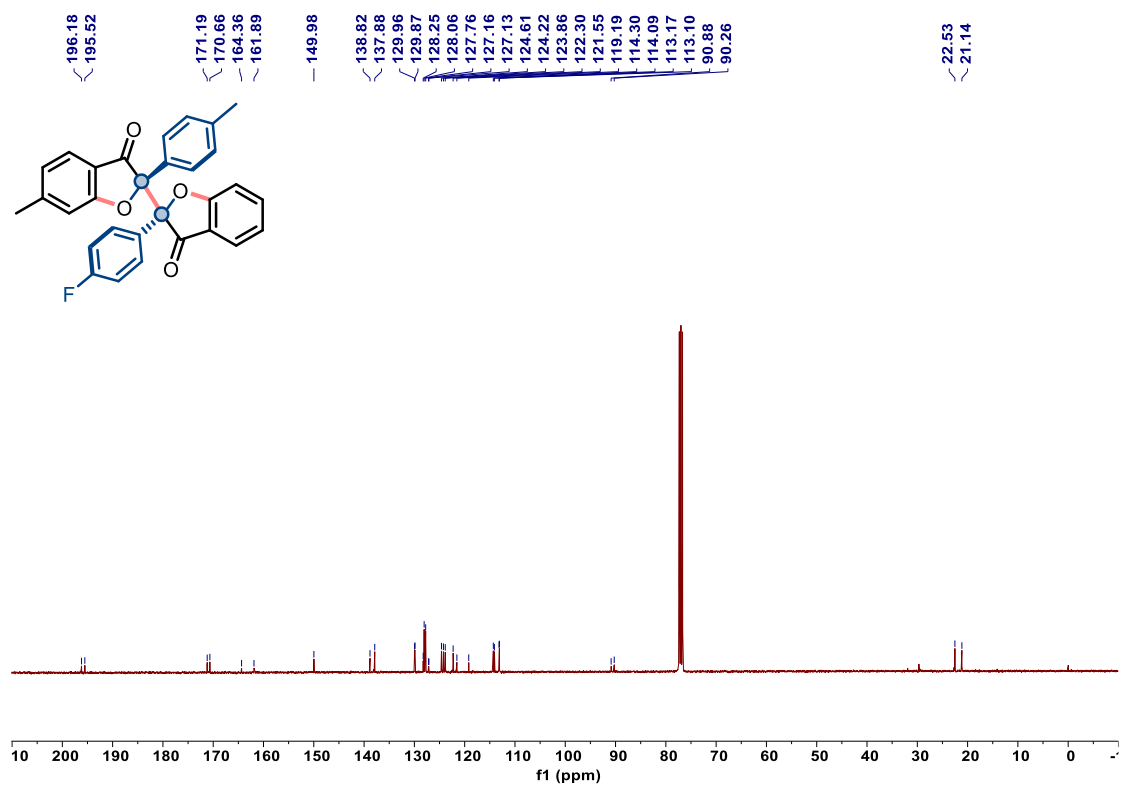

$^{19}\text{F}$  NMR (376 MHz,  $\text{CDCl}_3$ ) spectra of compound **2t-2**

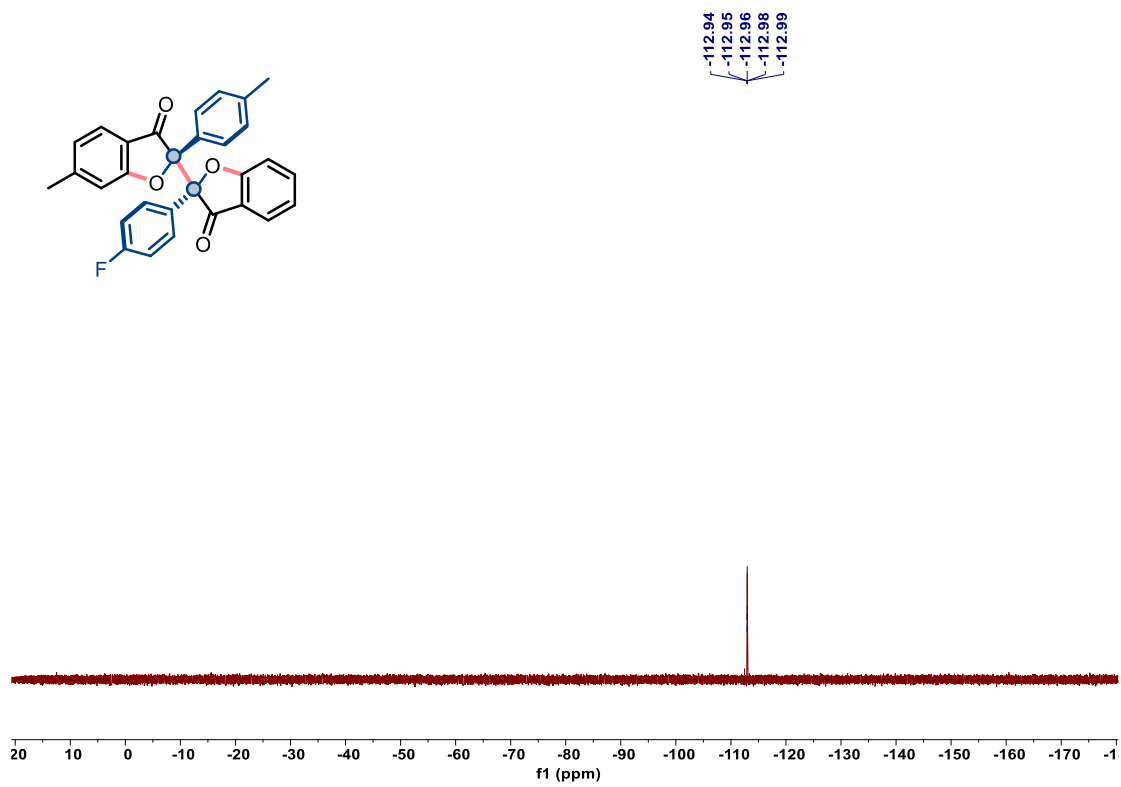

Supplement: d4cc06761d1.pdf [file d4cc06761d1.pdf]
